# Supplementary material for: Cholinergic dysfunction in the dorsal striatum promotes habit formation and maladaptive eating
Source: JCI journal article supplement (doi:10.1172/jci138532), 2020-11-08
Supplement: sd1 [file 1]

1  
2  
3  
4  
5  
6  
7  
8  
9  
10  
11  
12  
13  
14  
15  
16  
17  
18  
19  
20  
21  
22  
23  
24  
25  
26  
27  
28  
29  
30  
31

Supplementary Material

**Cholinergic dysfunction in the dorsal striatum promotes habit formation and  
maladaptive eating**

**Authors:** Mathieu Favier, Helena Janickova, Damian Justo, Ornela Kljakic, Léonie Runtz, Joman Y. Natsheh, Tharick A. Pascoal, Jurgen Germann, Daniel Gallino, Jun-II Kang, Xiang Qi Meng, Christina Antinora, Sanda Raulic, Jacob P.R. Jacobsen, Luc Moquin, Erika Vigneault, Alain Gratton, Marc G. Caron, Philibert Duriez, Mark P. Brandon, Pedro Rosa Neto, Mallar M. Chakravarty, Mohammad M. Herzallah, Philip Gorwood, Marco A.M. Prado, Vania F. Prado and Salah El Mestikawy.

Correspondence to: [salah.elmestikawy@mcgill.ca](mailto:salah.elmestikawy@mcgill.ca), [vprado@robarts.ca](mailto:vprado@robarts.ca) and [mprado@robarts.ca](mailto:mprado@robarts.ca)

**This file includes:**

- Supplementary Material and Methods
- Supplementary Table S1 for Figure 1
- Statistical data Tables S2 – S7 for Figures 1-7
- Statistical data Tables S8 – S21 for Supplementary Figures 1-16
- Supplementary Figures 1-16
- Supplementary References

## 32 **Supplementary Material and Methods**

33

### 34 **Human subjects**

35 Patients were recruited at the “*Clinique des Maladies Mentales et de l’Encéphale*” (CMME,  
36 Hôpital Sainte-Anne), a care center specialized in eating disorders in Paris, France.

37 Inpatients and outpatients included met the Diagnostic and Statistical Manual of Mental  
38 Disorders (DSM5) criteria for anorexia nervosa restricting type (AN-R), *anorexia nervosa*  
39 binge-eating purging type (AN-BP), *bulimia nervosa* (BN) or binge eating disorder (BED). In  
40 the present study, patients are stratified between AN-R and eating disorders binge-purge  
41 patients (which includes: AN-BP, BN and BED) (Supplementary Table 1).

42 Patients were older than 18 years of age at the time of inclusion (Supplementary Table 1).

43 Healthy controls were seen by a senior psychiatrist using a semi-structured interview (MINI).

44 Healthy controls had no cognitive, physical or psychiatric illness nor were receiving any  
45 psychotropic medication. In the group of eating disorder patients, one was suffering from  
46 atypical anorexia nervosa and one was diagnosed with a sub-syndromal eating disorder. Fifty-  
47 six individuals were included in the study (25 controls and 31 patients). Healthy controls were  
48 matched to patients with EDs according to sex, age and education level. Exclusion criteria  
49 included psychiatric diagnoses such as schizophrenia or Asperger, medical or neurological  
50 conditions that impact feeding behaviors.

51

### 52 **The slip-of-action neurocognitive test**

53 Designed to evaluate the balance between goal-directed behaviors and habits in humans,  
54 this computer-based neurocognitive task is subdivided into 4 phases: instrumental learning  
55 stage, outcome devaluation stage, “slip-of-action” stage and baseline stage of inhibitory  
56 control (1, 2). The instructions given to participants for each phase and a short description of  
57 the test are described below.

58

#### 59 First phase (instrumental learning stage)

- 60 • For each picture/animal (stimulus), one correct response (right or left) is rewarded  
61 with points and a picture with another animal (outcome); an incorrect response is  
62 associated with no points and an empty picture.
- 63 • Measures: Rate of correct responses, reaction time.
- 64 • 10 blocks, stimuli in random order, 120 trials in total.

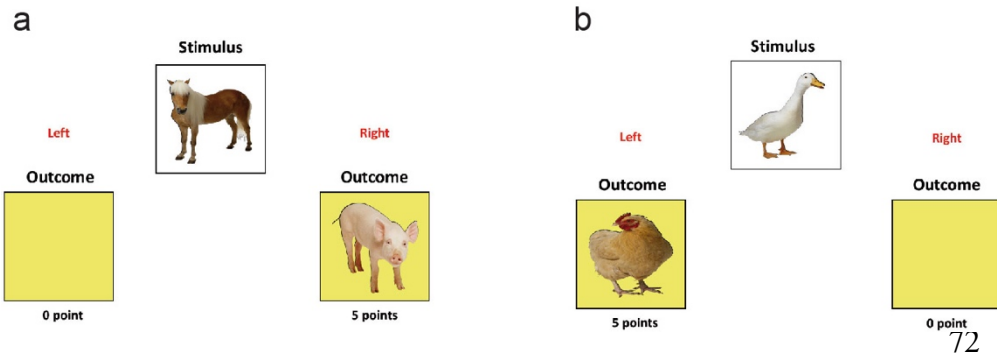

73

74 Instructions:

75 *On the screen:* In this game, **your aim is to earn as many points as possible. Points will**  
 76 **be collected by pressing either the right OR left key when a picture of an animal is**  
 77 **shown to you.** For each animal, a correct response will reveal a new animal picture, and  
 78 you will get points. However, an incorrect response will lead to an empty picture, and you will  
 79 get no points. **Your task is to learn the association between the animal picture and**  
 80 **which key to press.** Sometimes the correct response will be the left key, and other times the  
 81 right key. As such, the first animal picture should give you a clue as to which key you should  
 82 press. **You should also learn the association between the first and second animal**  
 83 **picture following a correct response.** The quicker you press the correct key, the more  
 84 points will be accumulated. Your total number of points will be displayed at the top of the  
 85 screen.

86 *Oral explanation:* You will see that animals always come by pairs: one animal on a white  
 87 background followed by one animal on a yellow background. Only the animal on a white  
 88 background allow you to get points, but it is also important to be careful in regards to the  
 89 other animal (on a yellow background) that it is associated to. The animal on a yellow  
 90 background does not give you any possibility to collect points, therefore it is not useful to  
 91 click the animal on a yellow background. You will realize that the animal on a yellow  
 92 background only appears when you click right or left on the keyboard, in response to a white  
 93 animal. If you click on the wrong key, the yellow background will appear on the screen  
 94 without any animal or point. In summary, for each animal that appears on a white  
 95 background, you should try to remind yourself of the correct answer (right of left key press)  
 96 and the animal on a yellow background that it is associated with (even if you don't see the  
 97 interest at this point, this second animal will be important later)

98

99 Second Phase (outcome devaluation stage)

- 100 • Participants are tested on their outcome-action knowledge

- 101 • Two of the outcomes (animals) from the discrimination training phase are presented  
 102 simultaneously on the screen, where one has a red X superimposed and the other does  
 103 not  
 104 • Participants are instructed to make the response that have previously led to an outcome  
 105 that did not have a red X superimposed  
 106 • 36 trials  
 107 • Measures: Rate of correct responses, reaction time

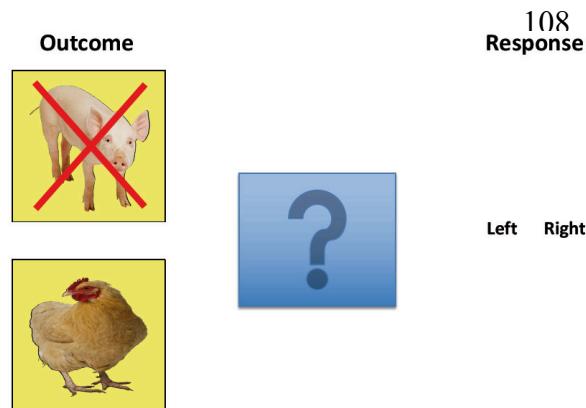

116

117

118 Instructions:

119 *On the screen.* For this phase, you will be shown two different pictures with two different  
 120 animals. One animal will be associated with the left key press from the previous task, while  
 121 the other will be associated with the right key press. **One of these pictures will now have a**  
 122 **red cross displayed on it. This picture no longer has a value, and it will bring you no**  
 123 **points. Your task consists of pressing the appropriate key that is associated with the**  
 124 **animal that does NOT show a red cross (valuable animals).** Your total number of points  
 125 will be displayed at the end of the stage.

126 *Oral explanation.* During this stage, it is no longer the animals on a white background that  
 127 are presented on the screen, but instead the animals on the yellow background. On each  
 128 trial, 2 animals on a yellow background will appear, one will have a red cross displayed on it  
 129 and the other will not. You will now only see animals on a yellow background, but they allow  
 130 you to get points by their association with animals on a white background (the association  
 131 that you probably learned in the previous stage). In summary, you will earn points by clicking  
 132 on the left or right key that was associated with a white background animal preceding a  
 133 yellow background animal.

134

135 Third Phase (“slip-of-action” stage)

- 136 • At the onset of each block, participants first show all the outcomes from training, two of  
 137 which had a red X superimposed, for 10 seconds.

- 138 • Stimuli are then presented alternatively.
- 139 • Participants are instructed to press the correct key for stimuli associated with still
- 140 valuable outcomes in the pair (Go trials) and withhold the response for stimuli
- 141 associated with devalued outcomes (No-go trials).
- 142 • 6 blocks, 144 trials in total. Each stimulus repeated 4 times in each block.
- 143 • Measures: Rate of responses associated with valuable and devaluated outcomes,
- 144 response accuracy, reaction time.

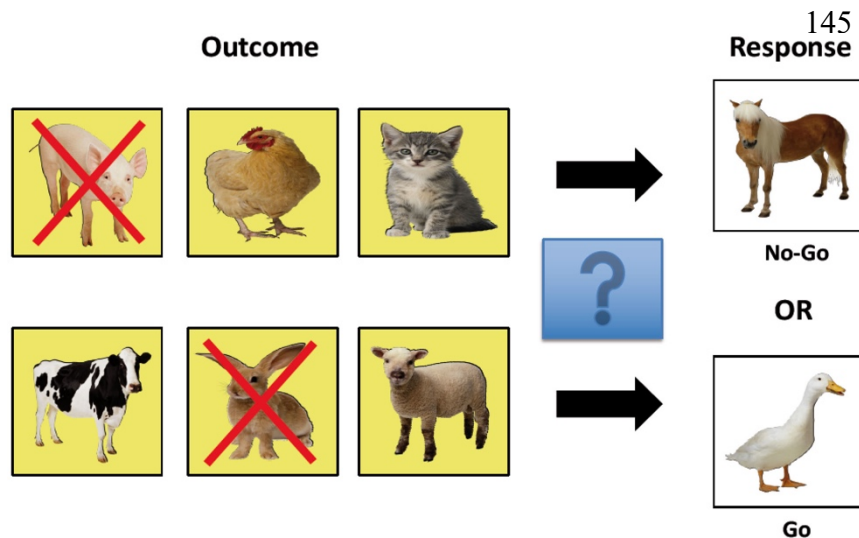

156 Instructions:

157 *On the screen.* For this phase, you will once again have the chance to earn points by

158 pressing keys in response to pictures of animals shown on the screen. However, remember

159 that animals with a red cross will no longer give you points. **Your task is to press the key**

160 **associated with pictures of the valuable animals but withhold the key press if the**

161 **picture shows a red cross (devalued animal).** Correct key presses will be rewarded,

162 incorrect key presses will not be rewarded, and one point will be deducted for every key

163 press made to a picture of an animal with a red cross (devalued animal). You must press the

164 keys quickly as the boxes will follow each other rapidly. You will be shown your cumulative

165 number of points only at the end of the stage.

166 *Oral explanation.* In this step, additional working memory will be necessary. During a few

167 seconds, you will see 6 animals on a yellow background, among them 2 will be red crossed.

168 Try to remind yourself what are the animals on a white background that were associated to

169 the red-crossed yellow animals and consider that those animals are now not rewarded: you

170 should not press on any key when those animals appear on the screen. After few seconds,

171 the 1<sup>st</sup> screen with 6 animals on a yellow background (with 2 red-crossed) will disappear and

172 other animals will come quickly on the screen. All the animals that will be displayed on the

173 screen will only be white background animals. You should click on the key (right or left) that

174 was associated with each of those animals, except for temporary “forbidden” animals, which

175 means the animals that were associated with yellow background animals with a red cross on  
 176 it (points will be subtracted if you click on a key when the non-rewarded animals appear).

177 The animals with the yellow background that are red-crossed will change for each trial, as  
 178 you will see, which means that the “forbidden” white animals will change too. To get the most  
 179 reward, speed is taken into account.

180 *(these instructions were repeated as often as necessary until the beginning of a trial)*

181

182 Fourth Phase (Baseline stage of inhibitory control)

- 183 • This stage is a control Go/No-Go task in which cueing stimuli themselves are
- 184 devalued.
- 185 • At the onset of each block, the 6 stimuli are shown simultaneously for 10 seconds.
- 186 Two of them are devalued, as indicated by a red X superimposed.
- 187 • Participants are instructed to provide correct key presses for valued stimuli (Go
- 188 trials) and withhold the response for devalued stimuli (No-go trials).
- 189 • Same numbers of trials and blocks as in the slip-of-action stage.
- 190 • Measures: Rate of responses associated with valued and devalued stimuli,
- 191 response accuracy, reaction time.

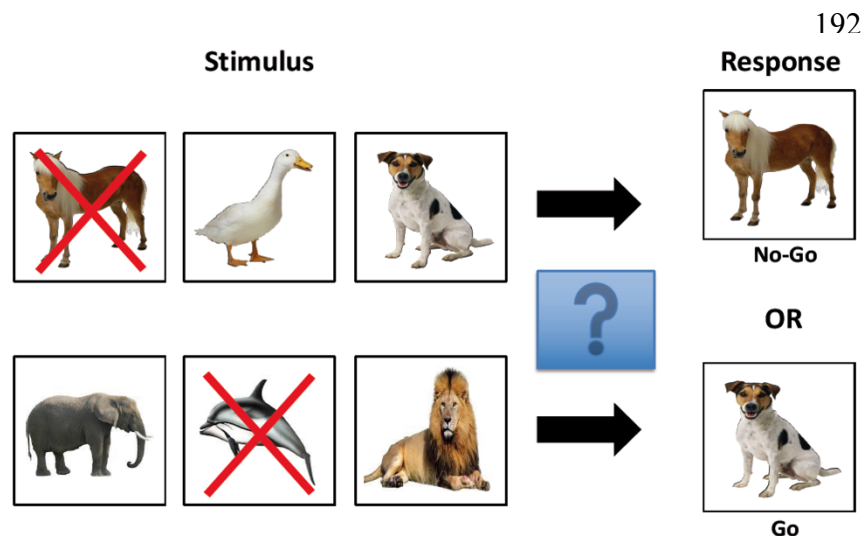

203

204

205 Instructions:

206 *On the screen:* For this phase, you will once again have the chance to earn points by  
 207 pressing keys in response to pictures of animals shown on the screen. However, remember  
 208 that animals with a red cross will no longer give you points. **Your task is to press the key**  
 209 **associated with pictures of the valuable animals but withhold the key press if the**  
 210 **picture shows a red cross (devalued animal).** Correct key presses will be rewarded,  
 211 incorrect key presses will not be rewarded, and one point will be deducted for every key

212 press made to a picture of an animal with a red cross (devalued animal). You must press the  
213 keys quickly as the boxes will follow each other rapidly. You will be shown your cumulative  
214 number of points only at the end of the stage.

215 *Oral explanation:* This step is similar to the previous one, but a little bit easier as it only uses  
216 white background animals, which means those that were directly associated to a key (right or  
217 left). Within few seconds, you will see 6 animals on a white background, among them 2 are  
218 red crossed, these animals are now “forbidden”. After few seconds, the 1<sup>st</sup> screen with white  
219 background animals will disappear and other animals on white background will quickly  
220 succeed on the screen. You must press the key (right or left) that was associated to each of  
221 the animals, except that you should refrain from pressing forbidden animals (if not, points will  
222 be removed). To get the maximal reward, speed of response is important.

223

## 224 **Animals**

225 Mice were housed in groups of two to four animals per cage (except when isolated for  
226 behavioral tasks as indicated) under standard conditions: 22±2 °C and a 12 h light/dark cycle  
227 (7:00-19:00 light period) with food (except when food-restricted for behavior as indicated)  
228 and water provided *ad libitum*. All precautions were taken to minimize the number of animals  
229 used and their suffering. Experiments were performed with 2- to 6-month-old male mice and  
230 their littermate controls. Animals were randomly allocated to experimental groups accordingly  
231 to their availability. Whenever possible, the investigator was blinded for experimental  
232 procedures.

233 The constitutive VGLUT3-null mouse line on C57BL/6N background was obtained as  
234 previously described (3, 4). Heterozygous mice were bred to generate VGLUT3<sup>-/-</sup> mice  
235 (*named VGLUT3-KO mice*) and wild-type (WT) littermates.

236 The VGLUT3<sup>flox/flox</sup> mice *Slc17a8* mutant mouse line was established at Phenomin - iCS  
237 (Phenomin- Institut Clinique de la Souris-, Illkirch, France; <http://www.phenomin.fr/>) (5). Mice  
238 lacking VGLUT3 selectively in striatal cholinergic interneurons (VGLUT3<sup>Chat-IRES-Cre-flox/flox</sup>,  
239 *named VGLUT3cKO mice*) were generated by breeding ChAT<sup>ires-Cre</sup> mice (B6N.129S6(B6)-  
240 *Chat<sup>tm2(cre)Low/J</sup>*) on a C57BL/6NJ-congenic background; The Jackson laboratory, stock No:  
241 018957) with VGLUT3<sup>flox/flox</sup> mice. Mice used in our experiments were littermates  
242 VGLUT3<sup>ChAT-IRES-Cre-flox/flox</sup> and VGLUT3<sup>flox/flox</sup>.

243 Selective ablation of VGLUT3 in ChIs was also obtained by crossing VGLUT3<sup>flox/flox</sup> mice with  
244 *Drd2<sup>Cre</sup>* mice, expressing Cre in DRD2-positive neurons (*named VGLUT3cKO-D2CRE mice*).  
245 D2-Cre mice (*Drd2, Tg(Drd2-cre)44Gsat/Mmcd*; MMRRC stock# 017263-UCD) (7) were  
246 obtained from the GENSAT project via the mutant mouse regional resource centers. They  
247 were backcrossed to C57BL/6J for 5 generations in our laboratory.

248 VACHT<sup>flox/flox</sup> mice were obtained as previously described (6) and were backcrossed to  
249 C57BL/6J for 10 generations. VACHT<sup>D2-Cre-flox/flox</sup> mice (named VACHTcKO mice) were  
250 generated by crossing VACHT<sup>flox/flox</sup> with the D2-Cre hemizygous mice (7). ChIs preferentially  
251 express the DRD2 in the dorsal striatum (8, 9). Therefore VACHT<sup>D2-Cre-flox/flox</sup> mice allows to  
252 reach a high level of VACHT deletion throughout the dorsal striatum. Mice used in our  
253 experiments were littermates VACHT<sup>D2-Cre-flox/flox</sup> and VACHT<sup>flox/flox</sup>.

254

### 255 **Immunoautoradiography**

256 Immunoautoradiography was performed as previously described (3, 4). Coronal sections (10  
257  $\mu\text{m}$ ) were taken with a cryostat and incubated with rabbit polyclonal anti-VGLUT3 (dilution  
258 1:10,000, Synaptic Systems, Goettingen, Germany, ref 135–203/26) or anti-VACHT  
259 antiserum (dilution 1:10,000, Synaptic Systems, Goettingen, Germany, ref 139-103/34)  
260 overnight at 4°C, followed by anti-rabbit [<sup>125</sup>I]-IgG (GE Healthcare lifesciences, 100 mCi.ml<sup>-1</sup>)  
261 for 2h. Sections were exposed to X-ray films (Biomax MR, Kodak, France) for 16 days.  
262 Autoradiograms were digitized using a powerLook 100 Umax scanner and analyzed with  
263 MCID Software.

264

### 265 ***In situ* hybridization**

266 *In situ* hybridization was performed as recommended by Oramecell (Paris, France) and as  
267 previously described (4). Sections (10  $\mu\text{m}$ ) of fresh frozen brains were incubated with  
268 antisense oligonucleotides. Oligonucleotides were labeled with [<sup>35</sup>S]dATP (GE Healthcare,  
269 Chalfont St. Giles, UK) using terminal transferase to a specific activity of 5x10<sup>8</sup> dpm. $\mu\text{g}^{-1}$ .  
270 Labeled sections were exposed to a BAS-SR Fujifilm imaging plate. The plates were  
271 scanned with a Fuji Bioimaging Analyzer BAS-5000.

272

### 273 **Western blots**

274 Immunoblotting was performed as previously described (10). Tissues were homogenized in  
275 RIPA lysis buffer containing protease inhibitor cocktail (Calbiochem). Samples were resolved  
276 in 10 % polyacrylamide gels and transferred to PVDF membranes. Membranes were probed  
277 with rabbit anti-VACHT (dilution 1:3000, Synaptic Systems, Goettingen, Germany, catalog ref  
278 139-103/34), rabbit anti-VGLUT3 (dilution 1:1000, Synaptic Systems, Goettingen, Germany,  
279 catalog refs 135–203/26) and rabbit or mouse anti-Synaptophysin (Abcam Cambridge, UK,  
280 ref ab32594, dilution 1:1000, or Sigma-Aldrich Saint-Louis, USA, ref S5768, dilution 1:500,  
281 respectively). Synaptophysin immunoactivity was used as loading control. Band intensity was  
282 quantified using ImageJ software.

283



**284 Immunofluorescence**

285 Immunofluorescence was performed on fixed cryostat sections as previously described (3).  
286 Sections were incubated with VGLUT3 rabbit antiserum (dilution 1:2000, Synaptic Systems,  
287 Goettingen, Germany, catalog refs 135–203/26) and VACHT guinea pig antiserum (dilution  
288 1:5000) (4). Primary antibodies were detected with secondary anti-rabbit or anti-guinea pig  
289 coupled to Alexa Fluor 488, Alexa Fluor 555 or Cy5 (dilution 1:2000, Invitrogen, Waltham,  
290 Massachusetts, USA). Images were acquired with a fluorescence microscope equipped with  
291 an Apotome module (Axiovert 200 M, Zeiss).

292

**293 qPCR**

294 For mRNA analysis tissue samples were frozen on dry ice and kept at -80°C until used. RNA  
295 was extracted and purified using the Aurum total RNA mini kit (BioRad) according the  
296 manufacturer's instructions. First-strand cDNA was synthesized using the High-Capacity  
297 cDNA transcription kit (Applied Biosystems, CA) according to the manufacturer's instructions.  
298 After reverse transcription, the cDNA was subjected to qPCR on a 7500 real-time PCR  
299 system (Applied Biosystems, CA) by using Power SYBR green PCR master mix (Applied  
300 Biosystems, CA). Amplification was carried out in a total volume of 5 µl containing 0.25 µM  
301 each primer, 2.5 µl of Power SYBR green master mix (2×), and 0.5 µl of cDNA. The PCRs  
302 were cycled 45 times after initial denaturation (95°C, 2 min) with the following parameters:  
303 95°C for 15 s, annealing at 60°C for 30 s, and extension at 72°C for 30 s. For each  
304 experiment, a nontemplate reaction was included as a negative control. Melting curve  
305 analysis of amplification products was performed by cooling the samples to 60°C and then  
306 increasing the temperature to 95°C at 0.1°C/s. Relative quantification of gene expression  
307 was done with the  $2^{-\Delta\Delta CT}$  method, using the  $\beta$ -actin gene expression to normalize the data.

308

**309 Touchscreen behavioral tasks**

310 During the touchscreen behavioral experiments, mice were subjected to mild food restriction  
311 (85 % of their original weight or 24.5-25.0 g, which ever was lower). While on food restriction,  
312 mice were weighed daily and their weights were kept in a required range. Food-restricted  
313 mice were separated and housed individually (if they fought) or in groups of two per cage.  
314 Touchscreen-based tasks (Pairwise discrimination (PD) with reversal, extinction, 5-choice  
315 serial reaction time task (5-CSRTT) were conducted using automated Bussey-Saksida  
316 mouse touchscreen systems model 81426 (Campden Instruments). Schedules were  
317 designed and data were collected using the ABET II Touch software v.2.15 (Lafayette  
318 Instruments). Mice were trained 5 days a week (1 session per day). Tasks were performed in  
319 a battery in the following order: PD with reversal followed by extinction (VGLUT3cKO mice,

320 VGLUT3cKO-D2CRE mice and VAcHTcKO mice) or PD with reversal followed by 5-CSRTT  
321 (AAV-injected VAcHT<sup>flox/flox</sup> mice/VAcHTcKO-DS).

322 *Pretraining.* Mice were habituated to the touchscreen apparatus at the beginning of the  
323 battery and then pretrained specifically for each task as needed. The habituation and  
324 pretraining procedure were done as previously described(11). In short, during the habituation  
325 (phase 1) mice were exposed to the touchscreen apparatus for 10-40 minutes per day and  
326 they were gradually habituated to the milkshake reward, with a tone playing whenever the  
327 mouse entered the reward magazine. The following pretraining phases (phases 2-5) were  
328 almost identical for PD, 5-CSRTT and extinction task, except the mask used on the  
329 touchscreen was different and only pretraining phases 2 and 3 were performed before the  
330 extinction task. The phase 2 of pretraining involved pairing the reward with the presentation  
331 of the stimulus on the touchscreen. The stimulus appeared randomly in one of the windows,  
332 and after 30 s it was removed and a reward was given paired with a tone. If the mouse  
333 touched the screen while the stimulus was displayed, it immediately received a reward. Once  
334 the mouse collected the reward a new trial was initiated. This phase was repeated until the  
335 mouse completed 30 trials within 60 min. In the following phase 3, the mouse was required to  
336 touch the stimulus on the screen in order to receive a reward paired with a tone. Once again,  
337 this was repeated until the mouse completed 30 trials within 60 min. Phase 4 was identical to  
338 phase 3, except that the mouse was required to initiate each trial by entering the reward  
339 magazine (same criterion). Finally, in the phase 5, the previous procedure was repeated but  
340 if the mouse touched an incorrect screen (with no stimulus displayed), it did not receive any  
341 reward plus a 5 s time-out, during which the house light was turned on. The final phase  
342 required the mouse to perform 30 trials in 60 min with at least 23 correct responses for 2  
343 consecutive days.

344 *Pairwise discrimination with reversal.* Pairwise visual discrimination and reversal task were  
345 performed as described in published protocols (11). The mice were first trained to  
346 discriminate between two visual stimuli (Fig. 1a), which were presented simultaneously, with  
347 their spatial location randomized over a 30-trial session. If the mouse nose-poked the correct  
348 stimulus (S+), a tone was played and mouse received a reward, whereas if the incorrect  
349 stimulus (S-) was nose-poked, the mouse received a 5 s time-out, during which the house  
350 light was turned on, followed by a correction trial. The correction trial was repeated with the  
351 same configuration as the preceding incorrect trial until the mouse made a correct response.  
352 The correction trials were not included into total count of completed trials or in the final  
353 percentage of correct responses. Criterion was completing 30 trials in a session and 80% of  
354 the correct responses for 2 consecutive days. Once mice reached criteria, they were given  
355 two sessions to assess baseline performance on the task and then they were transferred to  
356 the reversal phase. In the reversal phase, the rule associated to each stimulus was switched

357 (Fig. 1d), that is, the rewarded image (S+) during acquisition became the (S-) image in  
358 reversal and was punished, while the (S-) image from acquisition became the correct  
359 stimulus (S+) and was rewarded.

360 *5-CSRTT*. The task was performed using a previously published protocol (11). Briefly, every  
361 session lasted max. 60 minutes and consisted of max. 50 trials. Each trial was initiated after  
362 the mouse entered the reward magazine. The stimulus (white square) was presented after a  
363 variable 5-10 s delay, during which the animal was required to attend to the screen. The  
364 stimulus duration was initially set to 4 s, followed by a limited holding period of 5 s, during  
365 which the stimulus was absent, but the mouse could still respond to the location (holding  
366 period). Responses to the stimulus window during stimulus presence or the holding period  
367 were recorded as correct while responses to any other window were recorded as incorrect. A  
368 correct choice was associated with a tone, reward magazine illumination and reward  
369 delivery. An incorrect response was punished with a 10 s time-out. A failure to respond to  
370 any window either during stimulus display, or during the holding period, was recorded as an  
371 omission and punished with a 10 s time-out. Once the performance of a mouse reached  
372 criterion at 4 s stimulus duration (completing minimum 30 trials within 60 minutes with  
373 minimum 80% accuracy and maximum 20% omissions for 3 consecutive days), the stimulus  
374 duration was reduced to 2 s. After reaching criterion with the 2 s stimulus, mice were  
375 transferred to probe trials. During the probe trials, each mouse was tested for 2 consecutive  
376 days at a given stimulus duration (1.5, 1.0, 0.8, and 0.6 s). After each test, the animal was re-  
377 tested onto the 2 s stimulus duration for 2 days, to assess baseline performance. The order  
378 of the probe trial sessions was semi-randomized across cohort. On all *5-CSRTT* task  
379 sessions, accuracy was defined as the total number of correct responses, divided by the  
380 number of correct and incorrect (touches to a wrong window) responses and the rate of  
381 omissions was the proportion of omitted responses to total trials.

382 *Extinction*. We followed a protocol described by Nithianantharajah et al. (12) with slight  
383 modifications. During extinction acquisition phase, mice were required to respond to a white  
384 square stimulus presented in the center of the screen in order to obtain a reward. The  
385 stimulus remained on the screen until the response was made and was removed afterwards  
386 together with a tone, magazine illumination and reward delivery. The acquisition criterion was  
387 defined as completing 30 trials within 12.5 minutes on five consecutive days and ensured  
388 comparable performance across all groups of mice before entering probe sessions. After  
389 reaching this criterion, mice were transferred to extinction probe phase in which responses to  
390 the stimulus were no longer rewarded nor accompanied by any other feedback. During the  
391 probe sessions, the stimulus was displayed for 10 s and then it was automatically removed if  
392 no response was made. It was removed immediately if the response was made. After 10 s  
393 inter-trial interval, a new trial (stimulus presentation) was automatically initiated. Session was

394 terminated after 30 trials (maximum time of 1 session when no response was made was 12.5  
395 minutes). The extinction probe phase was conducted over the course of six days.

396

### 397 **Operant sucrose self-administration**

398 Mice were single-housed and placed on a food deprivation schedule to reduce their weight to  
399 85% of their baseline weight. They were weighed and fed with regular home chow daily after  
400 training. Water was available at all times in the home cages. Training and testing took place  
401 in eight operant chambers (21.6 cm length X 17.8 cm width X 12.7 cm height; MED  
402 Associates, Inc., Georgia, VT, USA) housed within light-resistant and sound-attenuating  
403 walls. Each chamber was equipped with a food magazine that received sucrose pellets  
404 (20mg chocolate flavor Dustless precision pellets, Bio-Serv, Canada) from a dispenser. Each  
405 chamber contained two holes with lights inside, on either side of the magazine, one randomly  
406 selected as the active hole and the other as the inactive, a house light (3 W/24 V) mounted  
407 on the wall opposite the magazine and a fan. A computer with the Med-PC-IV program was  
408 used to control the equipment and record behavior.

409

410 *Nosepoke training.* Mice were trained 7 days a week (1 session per day). At the beginning of  
411 each session, the house light, the lights inside the two holes and the fan were turned on. At  
412 the end of each session, the house light, the lights inside the two holes and the fan were  
413 turned off. Initial nosepoke training consisted of 12 consecutive days of continuous  
414 reinforcement (CRF), using a fixed-ratio 1 (FR1) procedure during which the animals  
415 received a pellet for each nosepoke. Sessions ended after 60 min without cut-off (except for  
416 VGLUT3-KO mice and control littermates, for this group, sessions ended after 60 min or 50  
417 rewards, whichever came first). For the groups of mice used to test habitual behavior, after  
418 12 days of CRF, mice were then trained with random interval (RI) schedules to generate  
419 habitual nosepoking (13). Mice were trained 2 days on RI-30 (on average one reinforcer  
420 delivered upon the first nosepoke after 30 seconds since the last reinforcer) and then  
421 switched to RI-60 for 6 additional days.

422 *Devaluation tests.* A sensory-specific satiety procedure was used for outcome devaluation  
423 (13). This procedure controls the overall level of satiety and motivational state while altering  
424 the current value of a specific reward. The devaluation test started 24 hours after the last  
425 training day and lasted 2 days. On each day, mice were given *ad libitum* food exposure for 1  
426 hour in a separate clean cage. Mice were allowed to consume either the grain pellets  
427 (homechow) they had been exposed in their home cages (valued condition) or the reinforcer  
428 (sucrose pellets) used during nosepoke sessions (devalued condition). The amount of food  
429 consumed during the *ad libitum* session was recorded and mice that did not consume a  
430 minimum of 0.4 g of each food were not included in the analyses. We observed no significant

431 difference of regular food or sucrose pellets consumption between mutant mouse lines and  
432 their respective controls (Supplementary Figure 16).

433 Immediately after the *ad libitum* feeding session, mice were given a 5-minute test in  
434 extinction in the operant chambers, with house light, holes lights and fan on (same conditions  
435 as for nosepoke training) but no pellet was delivered. No extra training was conducted on  
436 probe days. The order of the valued and devalued condition tests (day 1 or day 2) was  
437 counterbalanced across animals, and the number of active and inactive nosepokes for each  
438 condition was recorded.

439

#### 440 **Binge-like sucrose overconsumption model**

441 Mice were housed individually in Plexiglas cages. For habituation, water and food were  
442 available *ad libitum* during 2 days. Mice were then food deprived for 20-h (12PM-8AM) with  
443 free access to water. During 4 hours per day (8AM-12PM), mice had simultaneously access  
444 to a highly-concentrated sucrose solution (20%, Sigma) and water with the two-bottle method  
445 and food (Figure 2a). To control for side preference, the left/right position of the sucrose  
446 solution and water was alternated daily. Consumption of the sucrose solution during the first  
447 hour (8AM-9AM) and the total 4 hours (8AM-12PM) were recorded daily. Consumptions of  
448 water and food were recorded daily after 4 hours of access. Daily body weight (BW) was also  
449 measured before sucrose and food access. Another cohort of mice received saccharine (5  
450 mM) instead of sucrose throughout the same regimen (14).

451

#### 452 **Sucrose preference**

453 Mice were given 24-h concurrent access to two graduated plastic bottles for 3 days in their  
454 home cages. One of these bottles contained tap water, whereas the other one contained  
455 20% sucrose solution. Bottles were weighed daily, with the position of the bottles (left/right)  
456 alternated to control for side preference. The first day was used as a habituation period. The  
457 volumes of sucrose solution and water consumed on the second and third days were  
458 averaged to determine sucrose, water and total fluid intake, and preference for sucrose over  
459 water (sucrose intake/total fluid intake).

460

#### 461 **Activity-based anorexia model**

462 The ABA model was performed as previously described (15). For habituation, all mice were  
463 individually housed in cages (26 cm length X 12 cm width X 16 cm height) with running  
464 wheels (diameter: 14 cm; width: 9 cm) for 7 days prior to the start of the experiment (Figure  
465 2i). This period was named "Baseline Conditions". Under baseline conditions, mice had  
466 unrestricted access to food, water and running wheel. After the adaptation period, all mice  
467 were maintained in the same running wheel cages for 8 additional days. Access to food was  
468 progressively restricted, from 8 hours (day 1) to 2 hours (day 8) per day. BW and food intake

469 were measured daily before and after food access, respectively. Animal were euthanized or  
470 « dropped » from experiments when they lost 70% of their initial body weight defined on the  
471 last day of baseline. Days until mice reached 75% of baseline BW provided a measure of  
472 survival. For running wheel activity recording, animals were individually housed in light-  
473 controlled (7:00-19:00 light period) cabinets and activity was recorded continuously  
474 (ClockLab, Actimetrics, Wilmette, IL). For pharmacological treatment experiment, mice  
475 received an intraperitoneal injection of Donepezil ( $0.3 \text{ mg.kg}^{-1}$ , diluted in NaCl 0.9%), L-  
476 DOPA ( $15 \text{ mg.kg}^{-1}$  - benzerazide ( $7.5 \text{ mg.kg}^{-1}$ ) diluted in NaCl 0.9%) or NaCl 0.9%. Mice  
477 were treated daily 30 min. before the start of food access, during both baseline and food  
478 restriction phases (Donepezil) or only during food restriction phase (L-DOPA).

479

### 480 **Stereotaxic surgery and intracerebral virus infusions**

481 *Virus injections for touchscreen experiments.* VAcHT-lox mice were anesthetized with  
482 ketamine ( $100 \text{ mg.kg}^{-1}$ )-xylazine ( $10 \text{ mg.kg}^{-1}$ ) diluted in saline. Ophthalmic ointment was  
483 applied to prevent corneal drying. Mice were placed into stereotaxic apparatus and the same  
484 height of bregma and lambda was checked to ensure flat skull position. Incision was made to  
485 expose the skull, two symmetrical holes were drilled and the Hamilton syringe (28G,  $10 \mu\text{L}$ )  
486 was placed at the following coordinates (in mm relative to bregma): AP, +0.8; ML,  $\pm 1.9$ ; DV, -  
487 3.9 to target the dorsal striatum. Using a microsyringe pump (UltraMicroPump, World  
488 Precision Instruments),  $2 \mu\text{l}$  of adeno associated virus (AAV) expressing Cre recombinase  
489 and GFP were injected. AAV from two different sources were used throughout the study:  
490 AAV8-CMV-Cre-GFP from Vector Biolabs and AAV5-CMV-Cre-GFP from UNC Vector Core  
491 together with their respective controls (AAV8-CMV-GFP, Vector Biolabs and AAV5-CMV-  
492 GFP, UNC Vector Core) (*mice named VAcHTcKO-DS*). Injection rate was  $500 \text{ nl.min}^{-1}$  and  
493 the needle was left in place 5 minutes after injection to allow the injected solution to be  
494 absorbed and to minimize the spread of the virus along the needle tract. The scalp incision  
495 was closed by tissue adhesive (Vetbond). Mice were kept on a heating pad during the  
496 surgery and meloxicam ( $10 \text{ mg.kg}^{-1}$ ) and warm saline was applied subcutaneously after the  
497 surgery for pain management and re-hydration. Behavioral testing was initiated 4 weeks after  
498 the surgery to allow for virus expression.

499 *Virus injections for eating disorders models.* VAcHT-lox mice were anesthetized with  
500 isoflurane. Ophthalmic ointment was applied. Mice were placed into stereotaxic apparatus  
501 and the same height of bregma and lambda was checked. An incision was made to expose  
502 the skull and two symmetrical holes were drilled. The injection needle (NanoFil 34GA  
503 Beveled needle, World Precision Instruments) connected to the Hamilton syringe (28G,  $10$   
504  $\mu\text{L}$ ) was placed at the following coordinates to target the dorsomedial striatum (in mm relative  
505 to bregma): AP, +1; ML,  $\pm 1$ ; DV, -3.5 and -2.7. Using a microsyringe pump (UltraMicroPump,

World Precision Instruments), we injected twice (one injection per each DV coordinate) 0.4  $\mu$ l of AAV5-CMV-Cre-GFP (mice named VACHTcKO-DMS) or AAV5-CMV-GFP (control mice). Both AAV were from UNC Vector Core (<http://www.med.unc.edu/genetherapy/vectorcore>). Injection rate was 100 nl.min<sup>-1</sup> and the needle was left in place 5 minutes after injection. Scalp incisions were closed by nylon sutures (Ethicon). Mice were kept on a heating pad during the surgery and meloxicam (10 mg.kg<sup>-1</sup>) and warm saline was applied subcutaneously after the surgery for re-hydration and pain management. Mice were used for behavioral testing 4 weeks post-surgery.

514

### 515 **Histological evaluation of VACHT deletion after intracerebral virus infusions**

516 *Histological evaluation for touchscreen experiments.* After completion of behavioral testing, mice were anesthetized with lethal dose of ketamine-xylazine and perfused with ice-cold 4% PFA in PBS. Brains were post-fixed in 4% PFA overnight and sectioned using a vibratome (40  $\mu$ m thick). Free-floating sections were incubated in Tris-buffered saline (TBS) with 1.2 % Triton X-100 for 20 min and rinsed in TBS. Non-specific binding was blocked by incubation for 1 h with 10 % normal goat serum in TBS. After rinsing twice in TBS, sections were incubated 24 hours with anti-GFP (chicken, 1:1000, Abcam Catalog# ab13970), anti-VACHT (rabbit, 1:250, Synaptic Systems Catalog# 139 103) and anti-CHT (mouse, 1:100; Synaptic Systems Catalog# 216 011). All incubations were performed at room temperature.

525 Antiserums were diluted in 0.2% Triton X-100 and 2% normal goat serum in TBS. After that sections were washed twice for 10 min in TBS and incubated with secondary fluorescent antibodies (anti-chicken Alexa 488, anti-rabbit Alexa 546 and anti-mouse Alexa 633, all Thermo Fisher Scientific), dilution 1:500 in 0.2% Triton X-100 and 2% normal goat serum in TBS. Sections were washed twice for 10 min in TBS then mounted on slides and visualized using either Zeiss ApoTome fluorescence microscope or Leica TCS SP8 confocal system. GFP expression was checked throughout the striatum in VACHTcKO-DS mice and control mice.

533 *Histological evaluation for eating disorders models.* After completion of behavioral testing, mice were anesthetized with a lethal dose of ketamine-xylazine and immunoautoradiography was performed on fresh frozen sections using VACHT and VGLUT3 antiserums as above-described (see « Immunoautoradiography »).

537

### 538 **In vivo microdialysis**

539 Mice were anesthetized with ketamine/xylazine (100 and 10 mg.kg<sup>-1</sup>, respectively, in saline, i.p.) and a guide cannula (CMA7, CMA Microdialysis, Chelmsford, MA, USA) was stereotactically implanted into the striatum (in mm relative to bregma: AP, 0.0; ML,  $\pm$ 2.0; DV, -1.8) and fixed in place with two anchor screws (CMA) and carboxylate dental cement

543 (CMA). Operated mice were singly housed, treated with antibiotics (sulfamethoxazole 1.2  
544 mg.ml<sup>-1</sup> and trimethoprim 0.24 mg.ml<sup>-1</sup>) in the drinking water and allowed to recover 48-96 h  
545 post-surgery.

546 *Dialysate collection:* The microdialysis probe was inserted into the guide cannula  
547 approximately 16h before the start of sample collection to allow for the stabilization of DA<sub>Ext</sub>  
548 levels. The mouse was gently restrained and the microdialysis probe (CMA7 7/2) was  
549 inserted into the guide cannula. The mouse was then placed in a circular chamber with  
550 bedding, chow and water available. A two-channel swivel (cat. no. 375/D/22QM; Instech,  
551 Plymouth Meeting, PA, USA) allowed for unimpeded movement of the mouse. Artificial CSF  
552 (147 mM NaCl, 2.7 mM KCl, 0.85 mM MgCl<sub>2</sub>, 1.2 mM CaCl<sub>2</sub>, CMA) was delivered at a flow  
553 rate of 0.45 ml.min<sup>-1</sup> from probe insertion until the end of experiment. Following the  
554 stabilization period, 4 baseline samples (30 min duration) were collected, where after artificial  
555 CSF with 10 μM nomifensine (Sigma) were perfused and 5 additional samples collected.  
556 Samples were collected on ice in the dark, then immediately frozen on dry ice and finally  
557 stored at -80°C. Dialysates were analyzed off-line. The first baseline sample was analyzed  
558 for Ach<sub>Ext</sub> by LC-MS as previously described(16). The remaining dialysates were analyzed for  
559 DA<sub>Ext</sub> using high-performance liquid chromatography-electro-chemical detection (HPLC-EC).

560

### 561 ***In vivo* voltammetry**

562 *In vivo* voltammetry was performed as previously described (17). Mice were anaesthetized  
563 with chloral hydrate (400 mg.kg<sup>-1</sup>, i.p.) and voltammetric electrodes (Aldrich, Milwaukee, WI,  
564 USA) were implanted into the dorsomedial (DMS, stereotactic coordinates in mm relative to  
565 bregma AP, +1.1; ML, ±1; relative to the dura, DV, -2.6) or dorsolateral striatum (DLS, AP,  
566 +1.1; ML, ±2; DV, -2.6). Voltammetric electrodes consisted of one 30-μm diameter carbon  
567 fiber coated with Nafion (Aldrich). Electrochemical measurements were performed using a  
568 high-speed chronoamperometric apparatus (Quanteon, Lexington, KY, USA) as previously  
569 described (18). DA release was evoked by local injections of 200-300 nl of KCl (120 mM) at  
570 20-min interval between K1 and K2 and then 10-min intervals for next injections. The results  
571 are presented as the mean ± SEM of the difference in maximal DA variation after KCl  
572 ejection. The differences in DA release between the different groups of mice were assessed  
573 as a comparison with the differences in maximal variation for each group. The time to reach  
574 80% of the maximal response (t80) was measured as an estimate of DA clearance.

575

### 576 **Statistical analysis and mathematical modeling**

577 For anatomical and behavioral experiments, GraphPad Prism 7 and MATLAB were used for  
578 statistical analysis. 2-tailed Student's t test or Mann Whitney test were used to compare two  
579 experimental groups. Anatomical experiments were repeated 2-3 times on 4-5 mice, in vivo



580 voltammetry measurements were performed once on 11-17 mice, AAV-GFP and AAV-CRE  
581 injections were performed once on 11 mice (each group) whereas some behavioral  
582 experiments were performed once with several cohorts of mice as depicted in Suppl Figure  
583 8. Major behavioral experiments described in this study: evaluation of goal-directed  
584 behavior/habits balance and models of eating disorders (sucrose binge and activity-based  
585 anorexia) were performed at least 2 times, for both VAcHT- and VGLUT3-deleted mice  
586 versus respective controls. Comparable results were obtained in the replicated experiments.  
587 Two-way analysis of variance (ANOVA) with or without repeated measure (depending on the  
588 design of the experiment) was used to compare several experimental groups. For post-hoc  
589 analysis, Bonferroni's post hoc comparison, the method of contrasts or Dunnett's test were  
590 used as indicated. For ABA model, survival analysis (comparison of the percentage of mice  
591 reaching 75% of their baseline body weight) was performed using the Kaplan–Meier test with  
592 log-rank (Mantel–Cox) and Gehan-Breslow-Wilcoxon post hoc tests. Dimensional analyses  
593 were performed by parametric simple linear regressions. All analyses were performed used  
594 two-sided statistical tests. All statistical comparisons were made by comparing distinct  
595 samples, except for devaluation tests where the same mice were compared in  
596 valued vs devalued conditions. We evaluated the associations between mice behavioral data  
597 using structural equation modeling with the R package lavaan. The meta-models were  
598 created based on expected and hypothesized associations to test the hypothesis  
599 demonstrated in the figures for controls and VAcHTcKO mice. The models' estimates were  
600 generated with a bootstrap scheme repeated 1,000 times. The fit of the structural equation  
601 models was classified as good whether the root mean squared error of approximation  
602 (RMSEA) < 0.05, comparative fit index (CFI) > 0.97, and standardized root mean square  
603 residual (SRMR) < 0.05 (19). For logistic regression and ROC curve analysis, we used R (R  
604 Core Team (2017)) and IBM SPSS version 20 for Mac. Data were expressed as means ±  
605 SEM and *p* values < 0.05 were considered as statistically significant.

606

607

608 **Statistics**

609

610 **Table S1. Related to Figure 1. Demographic data of healthy controls and patients**611 **included in the neurocognitive test.**

612

|                                     | Healthy controls (n=25) | Eating disorders patients (n=31) | AN-R patients (n=21) | ED-BP patients (n=10) | HC vs EDs P value | HC vs AN-R P value | HC vs ED-BP P value | AN-R vs ED-BP P value |
|-------------------------------------|-------------------------|----------------------------------|----------------------|-----------------------|-------------------|--------------------|---------------------|-----------------------|
| Age                                 | 29.2±1.6                | 28.8±1.7                         | 27.8±2.0             | 31.2±2.9              | 0.8502            | 0.5787             | 0.5355              | 0.9286                |
| Gender (F/M)                        | 19/6                    | 29/2                             | 19/2                 | 10/0                  |                   |                    |                     |                       |
| Age at the beginning of the disease |                         | 19.3±1.8                         | 22.9±2.8             | 16.8±1.2              |                   |                    |                     | 0.0529                |
| Duration of illness                 |                         | 12.0±2.1                         | 8.5±1.8              | 14.7±2.9              |                   |                    |                     | 0.0774                |
| EDI-2                               |                         | 94.0±9.0                         | 94.7±13.6            | 92.7±11.3             |                   |                    |                     | 0.8322                |
| ISCED                               | 6.1±0.1                 | 5.9±0.1                          | 5.7±0.2              | 6.0±0.0               | 0.0239            | 0.0348             | 0.1267              | 0.1636                |
| BMI*                                |                         | 21.3±2.0                         | 17.3±0.5             | 25.7±3.0              |                   |                    |                     | 0.0233                |
| EAT-40*                             |                         | 43.5±4.3                         | 60.0±3.8             | 27.0±3.4              |                   |                    |                     | 0.0003                |
| EDQ*                                |                         | 111.9±5.3                        | 117.4±6.8            | 106.4±8.6             |                   |                    |                     | 0.4366                |
| HAD-anxiety*                        |                         | 11.8±1.2                         | 13.7±1.1             | 9.2±1.4               |                   |                    |                     | 0.0365                |
| HAD-depression*                     |                         | 9.1±1.3                          | 9.8±1.7              | 6.9±1.4               |                   |                    |                     | 0.0883                |
| OCI*                                |                         | 21.8±2.1                         | 24.7±3.4             | 18.5±2.8              |                   |                    |                     | 0.4554                |

613

614 Abbreviations: AN-R, restrictive anorexia nervosa; ED-BP, binge eating/purging eating

615 disorders; F/M, female/male HC, healthy controls; EDI-2, Eating Disorder Inventory 2;

616 ISCED, International Standard Classification of Education; BMI, Body Mass Index; EAT-40,

617 Eating Attitudes Test 40; EDQ, Exercise Dependence Questionnaire; HAD, Hospital Anxiety

618 and Depression; OCI, Obsessive-Compulsive Inventory.

619

620

621 **Table S2 related to Figure 1.**  
622

| Instrumental learning stage (Phase 1) (Fig. 1A,B)                    |                    |         |
|----------------------------------------------------------------------|--------------------|---------|
| Two-way ANOVA repeated measures – HC vs TCA (all patients) (Fig. 1A) |                    |         |
|                                                                      | F-value            | p-value |
| Group                                                                | $F_{1,54}=0.5230$  | 0.4727  |
| Training blocks                                                      | $F_{9,496}=87.89$  | <0.0001 |
| Group x blocks                                                       | $F_{9,496}=0.6751$ | 0.7317  |
| Two-way ANOVA repeated measures – HC vs AN-R vs ED-BP (Fig. 1B)      |                    |         |
|                                                                      | F-value            | p-value |
| Group                                                                | $F_{2,53}=0.3325$  | 0.7186  |
| Training blocks                                                      | $F_{18,477}=77.58$ | <0.0001 |
| Group x blocks                                                       | $F_{18,477}=1.059$ | 0.7009  |

| Outcome devaluation stage (Phase 2) (Fig. 1C,D) |                   |         |
|-------------------------------------------------|-------------------|---------|
| t test - HC vs TCA (all patients) (Fig. 1C)     |                   |         |
| n                                               | p-value           |         |
| 25-31                                           | 0.2691            |         |
| One-way ANOVA - HC vs AN-R vs ED-BP (Fig. 1D)   |                   |         |
|                                                 | F-value           | p-value |
| Group                                           | $F_{2,53}=0.8307$ | 0.4413  |

| Slip-of-action stage (Phase 3) (Fig. 1E)           |                    |         |
|----------------------------------------------------|--------------------|---------|
| Two-way ANOVA - HC vs TCA (all patients) (Fig. 1E) |                    |         |
|                                                    | F-value            | p-value |
| Group                                              | $F_{1,108}=0.5471$ | 0.4611  |
| Condition                                          | $F_{1,108}=829.4$  | <0.0001 |
| Group x Condition                                  | $F_{1,108}=4.121$  | 0.0448  |
| Two-way ANOVA - HC vs AN-R vs ED-BP (Fig. 1E)      |                    |         |
|                                                    | F-value            | p-value |
| Group                                              | $F_{2,106}=1.433$  | 0.2432  |
| Condition                                          | $F_{1,106}=729.8$  | <0.0001 |
| Group x Condition                                  | $F_{2,106}=3.366$  | 0.0382  |

625  
626

| Slip-of-action stage (Phase 3) - heterogeneity       |          |         |
|------------------------------------------------------|----------|---------|
| Variances – ED-BP vs HC -Welch's test                |          |         |
|                                                      | n        | p-value |
|                                                      | 10-25    | 0.0123  |
| Slip-of-action stage (Phase 3) - heterogeneity       |          |         |
| Variances – AN-R vs HC -Welch's test                 |          |         |
|                                                      | n        | p-value |
|                                                      | 21-25    | <0.0001 |
| Slip-of-action stage (Phase 3) - heterogeneity       |          |         |
| Variances – ED-BP vs AN-R vs HC- Brown-Forsythe test |          |         |
|                                                      | n        | p-value |
|                                                      | 10-21-25 | 0.0210  |

627

| Baseline stage of response inhibition (Phase 4) (Fig. 1F) |                                 |         |
|-----------------------------------------------------------|---------------------------------|---------|
| Two-way ANOVA - HC vs TCA (all patients) (Fig. 1F)        |                                 |         |
|                                                           | F-value                         | p-value |
| Group                                                     | $F_{1,80}=8.069 \times 10^{-6}$ | 0.9977  |
| Value                                                     | $F_{1,80}=6147$                 | <0.0001 |
| Group x Value                                             | $F_{1,80}=6.339$                | 0.0133  |
| Two-way ANOVA - HC vs AN-R vs ED-BP (Fig. 1F)             |                                 |         |
|                                                           | F-value                         | p-value |
| Group                                                     | $F_{2,106}=0.006$               | 0.9939  |
| Value                                                     | $F_{1,106}=5391$                | <0.0001 |
| Group x Value                                             | $F_{2,106}=5.122$               | 0.0075  |

628

| Correlation cognitive flexibility-% of responses for devalued outcome |         |                          |         |
|-----------------------------------------------------------------------|---------|--------------------------|---------|
| Simple linear regression test                                         |         |                          |         |
| All eating disorders patients (Fig. 1G)                               |         |                          |         |
| n                                                                     | p-value |                          |         |
| 31                                                                    | <0.0001 |                          |         |
| AN-R vs ED-BP                                                         |         |                          |         |
| AN-R patients (Fig. 1H)                                               |         | ED-BP patients (Fig. 1I) |         |
| n                                                                     | p-value | n                        | p-value |
| 21                                                                    | 0.0011  | 10                       | 0.2513  |

629

630

631 **Table S3 related to Figure 2.**

632

| Pairwise Discrimination task with Reversal (Fig. 2A-H) |                                |         |                  |         |
|--------------------------------------------------------|--------------------------------|---------|------------------|---------|
|                                                        | VGLUT3cKO mice                 |         | VChTcKO mice     |         |
|                                                        | unpaired t-test                |         |                  |         |
|                                                        | Controls vs mutant littermates |         |                  |         |
| <i>Task phase</i>                                      | n                              | p-value | n                | p-value |
| Acquisition (Fig. 2B,C)                                | 12-14                          | 0.0652  | 14-15            | 0.6739  |
| Reversal (Fig. 2E,G)                                   | 12-14                          | 0.2858  | 14-15            | 0.0058  |
|                                                        | Two-way ANOVA (Fig. 2F,H)      |         |                  |         |
|                                                        | Controls vs mutant littermates |         |                  |         |
|                                                        | F-value                        | p-value | F-value          | p-value |
| Genotype                                               | $F_{1,24}=0.5246$              | 0.4724  | $F_{1,27}=19.43$ | 0.0001  |
| Session                                                | $F_{1,48}=34.81$               | <0.0001 | $F_{1,54}=94.43$ | <0.0001 |
| Genotype x Session                                     | $F_{1,48}=0.6359$              | 0.4291  | $F_{1,54}=9.714$ | 0.0043  |

633

| Pairwise Discrimination task with Reversal (Fig. 2R-T) |                                               |         |
|--------------------------------------------------------|-----------------------------------------------|---------|
| VChTcKO-DS mice                                        |                                               |         |
|                                                        | unpaired t-test                               |         |
|                                                        | AAV-Cre-GFP injected vs AAV-GFP injected mice |         |
| <i>Task phase</i>                                      | n                                             | p-value |
| Acquisition (Fig. 2R)                                  | 11-15                                         | 0.329   |
| Reversal (Fig. 2S)                                     | 11-15                                         | 0.0357  |
|                                                        | Two-way ANOVA (Fig. 2T)                       |         |
|                                                        | Controls vs mutant littermates (n=11-15)      |         |
|                                                        | F-value                                       | p-value |
| Genotype                                               | $F_{1,24}=8.939$                              | 0.0044  |
| Session                                                | $F_{1,48}=21.8$                               | <0.0001 |
| Genotype x Session                                     | $F_{1,48}=0.9268$                             | 0.3405  |

634

635

636 **Table S4 related to Figure 3.**  
637

| Sucrose self-administration - FR1 training – male VGLUT3cKO mice (Fig. 3B) |                    |         |
|----------------------------------------------------------------------------|--------------------|---------|
| VGLUT3cKO mice (n=13-11)                                                   |                    |         |
| Two-way ANOVA repeated measures                                            |                    |         |
| Controls vs mutant littermates                                             |                    |         |
|                                                                            | F-value            | p-value |
| Genotype                                                                   | $F_{1,22}=2.262$   | 0.1468  |
| Session                                                                    | $F_{11,242}=16.52$ | <0.0001 |
| Genotype x Session                                                         | $F_{11,242}=1.392$ | 0.1769  |

638

| Devaluation after FR1 training (Fig. 3C) |                   |                |         |
|------------------------------------------|-------------------|----------------|---------|
| Control male vs VGLUT3cKO male           |                   |                |         |
| Two-way ANOVA                            |                   |                |         |
|                                          | F-value           |                | p-value |
| Genotype                                 | $F_{1,42}=0.1656$ |                | 0.6861  |
| Value                                    | $F_{1,42}=17.36$  |                | 0.0002  |
| Genotype x Value                         | $F_{1,42}=0.1267$ |                | 0.7237  |
| Paired t test                            |                   |                |         |
| Valued vs devalued condition             |                   |                |         |
| Control male                             |                   | VGLUT3cKO male |         |
| n                                        | p-value           | n              | p-value |
| 12                                       | 0.0103            | 11             | 0.0006  |

639

| Sucrose self-administration - 2 last days FR1 + RI training (Fig. 3D) |                   |         |
|-----------------------------------------------------------------------|-------------------|---------|
| VGLUT3cKO mice (n=13-11)                                              |                   |         |
| Two-way ANOVA repeated measures                                       |                   |         |
| Controls vs mutant littermates                                        |                   |         |
|                                                                       | F-value           | p-value |
| Genotype                                                              | $F_{1,22}=5.132$  | 0.0337  |
| Session                                                               | $F_{9,198}=13.31$ | <0.0001 |
| Genotype x Session                                                    | $F_{9,198}=4.024$ | <0.0001 |

640

641

| Devaluation after RI training – Log 10 (Fig. 3E) |                           |                |                 |
|--------------------------------------------------|---------------------------|----------------|-----------------|
| Control male vs VGLUT3cKO male                   |                           |                |                 |
| Two-way ANOVA                                    |                           |                |                 |
|                                                  | F-value                   |                | <i>p</i> -value |
| Genotype                                         | F <sub>1,42</sub> =0.9588 |                | 0.3331          |
| Value                                            | F <sub>1,42</sub> =3.470  |                | 0.0695          |
| Genotype x Value                                 | F <sub>1,42</sub> =0.1339 |                | 0.7193          |
| Paired t test                                    |                           |                |                 |
| Valued vs devalued condition                     |                           |                |                 |
| Control male                                     |                           | VGLUT3cKO male |                 |
| n                                                | <i>p</i> -value           | n              | <i>p</i> -value |
| 13                                               | 0.1093                    | 10             | 0.0094          |

642

| Devaluation after RI training - Raw number of nose pokes (Fig. 3E) |                           |                |                 |
|--------------------------------------------------------------------|---------------------------|----------------|-----------------|
| Control male vs VGLUT3cKO male                                     |                           |                |                 |
| Two-way ANOVA                                                      |                           |                |                 |
|                                                                    | F-value                   |                | <i>p</i> -value |
| Genotype                                                           | F <sub>1,42</sub> =3.260  |                | 0.0782          |
| Value                                                              | F <sub>1,42</sub> =0.7523 |                | 0.3907          |
| Genotype x Value                                                   | F <sub>1,42</sub> =0.0002 |                | 0.9890          |
| Paired t test                                                      |                           |                |                 |
| Valued vs devalued condition                                       |                           |                |                 |
| Control male                                                       |                           | VGLUT3cKO male |                 |
| n                                                                  | <i>p</i> -value           | n              | <i>p</i> -value |
| 13                                                                 | 0.2276                    | 10             | 0.0336          |

643

644

645

| Sucrose self-administration - FR1 training - male VACHTcKO mice (Fig. 3F) |                    |         |
|---------------------------------------------------------------------------|--------------------|---------|
| Controls vs VACHTcKO (male) (n=12-12)                                     |                    |         |
| Two-way ANOVA repeated measures                                           |                    |         |
|                                                                           | F-value            | p-value |
| Genotype                                                                  | $F_{1,22}=9.732$   | 0.0050  |
| Session                                                                   | $F_{11,242}=42.30$ | <0.0001 |
| Genotype x Session                                                        | $F_{11,242}=5.530$ | <0.0001 |

646

| Devaluation after FR1 training (Fig. 3G) |                  |               |         |
|------------------------------------------|------------------|---------------|---------|
| Control male vs VACHTcKO male            |                  |               |         |
| Two-way ANOVA                            |                  |               |         |
|                                          | F-value          |               | p-value |
| Genotype                                 | $F_{1,44}=4.979$ |               | 0.0362  |
| Value                                    | $F_{1,44}=4.648$ |               | 0.0423  |
| Genotype x Value                         | $F_{1,44}=1.328$ |               | 0.2554  |
| Paired t test                            |                  |               |         |
| Valued vs devalued condition             |                  |               |         |
| Control male                             |                  | VACHTcKO male |         |
| n                                        | p-value          | n             | p-value |
| 12                                       | 0.0209           | 12            | 0.5316  |

647

| Progressive ratio after FR1 training (Fig. 3H) |         |
|------------------------------------------------|---------|
| Controls vs VACHTcKO (male)                    |         |
| Unpaired t test                                |         |
| n                                              | p-value |
| 12-12                                          | 0.0076  |

648

| Sucrose self-administration - FR1 training – female VACHTcKO mice (Fig. 3I) |                     |         |
|-----------------------------------------------------------------------------|---------------------|---------|
| Controls vs VACHTcKO (female) (n=11-13)                                     |                     |         |
| Two-way ANOVA repeated measures                                             |                     |         |
|                                                                             | F-value             | p-value |
| Genotype                                                                    | $F_{1,22}=0.6295$   | 0.4360  |
| Session                                                                     | $F_{11,242}=26.72$  | <0.0001 |
| Genotype x Session                                                          | $F_{11,242}=0.7364$ | 0.7029  |

649

650



651

| Devaluation after FR1 training (Fig. 3J) |                           |                 |                 |
|------------------------------------------|---------------------------|-----------------|-----------------|
| Control female vs VACHTcKO female        |                           |                 |                 |
| Two-way ANOVA                            |                           |                 |                 |
|                                          | F-value                   |                 | <i>p</i> -value |
| Genotype                                 | F <sub>1,44</sub> =0.1477 |                 | 0.7026          |
| Value                                    | F <sub>1,44</sub> =11.63  |                 | 0.0014          |
| Genotype x Value                         | F <sub>1,44</sub> =5.613  |                 | 0.0223          |
| Paired t test                            |                           |                 |                 |
| Valued vs devalued condition             |                           |                 |                 |
| Control female                           |                           | VACHTcKO female |                 |
| n                                        | <i>p</i> -value           | n               | <i>p</i> -value |
| 11                                       | 0.0055                    | 13              | 0.2363          |

652

| Progressive ratio after FR1 training (Fig. 3K) |                 |
|------------------------------------------------|-----------------|
| Controls vs VACHTcKO (female)                  |                 |
| Unpaired t test                                |                 |
| n                                              | <i>p</i> -value |
| 11-13                                          | 0.3290          |

653

654  
655**Table S5 related to Fig. 4.**

| Binge-like sucrose overconsumption model (Fig. 4B-G) |                             |         |
|------------------------------------------------------|-----------------------------|---------|
| Controls vs VAcHTcKO (male) (n=12-12)                |                             |         |
| Two-way ANOVA repeated measures                      |                             |         |
| <i>Sucrose consumption - H0-H4 (Fig. 4B)</i>         | F-value                     | p-value |
| Genotype                                             | F <sub>1,22</sub> =8.7      | 0.0074  |
| Time (Days)                                          | F <sub>15,330</sub> =64.28  | <0.0001 |
| Genotype x Time                                      | F <sub>15,330</sub> =1.994  | 0.0152  |
| <i>Sucrose consumption - H0-H1 (Fig. 4C)</i>         | F-value                     | p-value |
| Genotype                                             | F <sub>1,22</sub> =11.20    | 0.0029  |
| Time (Days)                                          | F <sub>15,330</sub> =32.78  | <0.0001 |
| Genotype x Time                                      | F <sub>15,330</sub> =1.564  | 0.0818  |
| <i>Sucrose consumption - H1-H4 (Fig. 4D)</i>         | F-value                     | p-value |
| Genotype                                             | F <sub>1,22</sub> =2.467    | 0.1305  |
| Time (Days)                                          | F <sub>15,330</sub> =28.38  | <0.0001 |
| Genotype x Time                                      | F <sub>15,330</sub> =2.498  | 0.0017  |
| Controls vs VAcHTcKO (female) (n=11-13)              |                             |         |
| Two-way ANOVA repeated measures                      |                             |         |
| <i>Sucrose consumption - H0-H4 (Fig. 4E)</i>         | F-value                     | p-value |
| Genotype                                             | F <sub>1,22</sub> =15.28    | 0.0008  |
| Time (Days)                                          | F <sub>15,330</sub> =78.93  | <0.0001 |
| Genotype x Time                                      | F <sub>15,330</sub> =4.709  | <0.0001 |
| <i>Sucrose consumption - H0-H1 (Fig. 4F)</i>         | F-value                     | p-value |
| Genotype                                             | F <sub>1,22</sub> =6.20     | 0.0165  |
| Time (Days)                                          | F <sub>15,330</sub> =37.25  | <0.0001 |
| Genotype x Time                                      | F <sub>15,330</sub> =4.174  | <0.0001 |
| <i>Sucrose consumption - H1-H4 (Fig. 4G)</i>         | F-value                     | p-value |
| Genotype                                             | F <sub>1,22</sub> =1.589    | 0.2207  |
| Time (Days)                                          | F <sub>15,330</sub> =23.07  | <0.0001 |
| Genotype x Time                                      | F <sub>15,330</sub> =0.8198 | 0.6555  |

656  
657

658

| Activity-based anorexia model - survival (Fig. 4I) |       |         |
|----------------------------------------------------|-------|---------|
| Controls vs VChTcKO (male)                         |       |         |
| Kaplan–Meier test                                  |       |         |
|                                                    | n     | p-value |
| Log-rank (Mantel-Cox) post hoc comparison          | 12-12 | 0.0314  |
| Gehan-Breslow-Wilcoxon post hoc comparison         | 12-12 | 0.0416  |
| Activity-based anorexia model - survival (Fig. 4J) |       |         |
| Controls vs VChTcKO (female)                       |       |         |
| Kaplan–Meier test                                  |       |         |
|                                                    | n     | p-value |
| Log-rank (Mantel-Cox) post hoc comparison          | 11-13 | 0.0039  |
| Gehan-Breslow-Wilcoxon post hoc comparison         | 11-13 | 0.0197  |

659

660

661

662 **Table S6 related to Fig. 5.**  
663

| Logistic Regression analysis for Binge-like sucrose overconsumption model<br>(related to Figure 5G) |            |    |                 |
|-----------------------------------------------------------------------------------------------------|------------|----|-----------------|
| Tests for Model Coefficients                                                                        |            |    |                 |
|                                                                                                     | Chi-square | df | <i>p</i> -value |
| Block                                                                                               | 30.953     | 5  | 0.000           |
| Model                                                                                               | 30.953     | 5  | 0.000           |

664  
665

| Model Summary  |                      |                     |
|----------------|----------------------|---------------------|
| Log Likelihood | Cox & Snell R Square | Nagelkerke R Square |
| 23.031         | 0.475                | 0.704               |

666  
667

| Hosmer and Lemeshow Test |    |                 |
|--------------------------|----|-----------------|
| Chi-square               | df | <i>p</i> -value |
| 2.091                    | 8  | 0.978           |

668  
669

| Classification Table |          |                    |        |
|----------------------|----------|--------------------|--------|
|                      | Wildtype | ABA                | %      |
| Wildtype             | 34       | 2                  | 94.44  |
| Binge                | 2        | 10                 | 83.33  |
|                      |          | Overall Percentage | 91.667 |

670  
671

| Variables in the Logistic Regression Equation |        |                |       |    |                 |        |
|-----------------------------------------------|--------|----------------|-------|----|-----------------|--------|
| Variable                                      | B      | Standard error | Wald  | df | <i>p</i> -value | Exp(B) |
| <i>Valued Accuracy</i>                        | -0.189 | 0.076          | 6.154 | 1  | 0.013           | 0.828  |
| Devalued Accuracy                             | 0.112  | 0.065          | 2.939 | 1  | 0.086           | 1.119  |
| Sex                                           | -4.113 | 1.517          | 7.357 | 1  | 0.007           | 0.016  |
| Genotype                                      | -0.133 | 1.262          | 0.011 | 1  | 0.916           | 0.876  |
| Motivation Nosepokes                          | 0.002  | 0.010          | 0.055 | 1  | 0.814           | 1.002  |
| Constant                                      | 2.204  | 2.042          | 1.164 | 1  | 0.281           | 9.057  |

672  
673674 **ROC analysis**

675

676 N-positive = 13, N-negative = 35

677

677 AUC = 92.1%, *p* < 0.001

678

| Logistic Regression analysis for ABA model<br>(related to Figure 5H) |            |    |         |
|----------------------------------------------------------------------|------------|----|---------|
| Tests for Model Coefficients                                         |            |    |         |
|                                                                      | Chi-square | df | p-value |
| Block                                                                | 29.134     | 5  | 0.001   |
| Model                                                                | 29.134     | 5  | 0.001   |

679

680

| Model Summary  |                      |                     |
|----------------|----------------------|---------------------|
| Log Likelihood | Cox & Snell R Square | Nagelkerke R Square |
| 26.938         | 0.455                | 0.660               |

681

682

| Hosmer and Lemeshow Test |    |         |
|--------------------------|----|---------|
| Chi-square               | df | p-value |
| 5.967                    | 8  | 0.651   |

683

684

| Classification Table |          |                    |        |
|----------------------|----------|--------------------|--------|
|                      | Wildtype | ABA                | %      |
| Wildtype             | 31       | 4                  | 88.57  |
| Binge                | 3        | 10                 | 76.92  |
|                      |          | Overall Percentage | 84.417 |

685

686

| Variables in the Logistic Regression Equation |         |                |       |    |         |        |
|-----------------------------------------------|---------|----------------|-------|----|---------|--------|
| Variable                                      | B       | Standard error | Wald  | df | p-value | Exp(B) |
| <i>Valued Accuracy</i>                        | -0.040  | 0.027          | 2.250 | 1  | 0.134   | 0.961  |
| <i>Devalued Accuracy</i>                      | 0.089   | 0.042          | 4.425 | 1  | 0.035   | 1.093  |
| Sex                                           | 1.647   | 1.098          | 2.250 | 1  | 0.134   | 5.193  |
| Genotype                                      | -22.964 | 7006.104       | 0.000 | 1  | 0.997   | 0.000  |
| Motivation Nosepokes                          | 0.005   | 0.007          | 0.481 | 1  | 0.488   | 1.005  |
| Constant                                      | -2.121  | 1.786          | 1.410 | 1  | 0.235   | 0.120  |

687

688

689 **ROC analysis**

690

691 N-positive = 13, N-negative = 35

692 AUC = 92.1%,  $p < 0.001$ 

693

694 **Table S6 related to Fig. 6.**  
695

| Voltammetry - DA release - dorsomedial striatum (DMS) (Fig. 6B) |                                     |         |
|-----------------------------------------------------------------|-------------------------------------|---------|
|                                                                 | Controls vs VAcHTcKO mice (n=11-16) |         |
|                                                                 | Two-way ANOVA repeated measures     |         |
|                                                                 | Controls vs mutant littermates      |         |
|                                                                 | F-value                             | p-value |
| Genotype                                                        | $F_{1,25}=5.933$                    | 0.0223  |
| Injections                                                      | $F_{3,75}=54.70$                    | <0.0001 |
| Genotype x Injections                                           | $F_{3,75}=3.501$                    | 0.0195  |

| Voltammetry - DA release - dorsomedial striatum (DMS) (Fig. 6C) |                                |         |
|-----------------------------------------------------------------|--------------------------------|---------|
|                                                                 | VAcHTcKO mice                  |         |
|                                                                 | Mann Whitney                   |         |
|                                                                 | Controls vs mutant littermates |         |
| <i>KCl injection</i>                                            | n                              | p-value |
| K1                                                              | 11-16                          | 0.0300  |

| Voltammetry - DA release - dorsolateral striatum (DLS) (Fig. 6F) |                                     |         |
|------------------------------------------------------------------|-------------------------------------|---------|
|                                                                  | Controls vs VAcHTcKO mice (n=16-17) |         |
|                                                                  | Two-way ANOVA repeated measures     |         |
|                                                                  | Controls vs mutant littermates      |         |
|                                                                  | F-value                             | p-value |
| Genotype                                                         | $F_{1,31}=0.0617$                   | 0.8054  |
| Injections                                                       | $F_{3,93}=64.16$                    | 0.0001  |
| Genotype x Injections                                            | $F_{3,93}=0.7421$                   | 0.5296  |

| Voltammetry - DA release - dorsolateral striatum (DLS) (Fig. 6G) |                                |         |
|------------------------------------------------------------------|--------------------------------|---------|
|                                                                  | VAcHTcKO mice                  |         |
|                                                                  | Mann Whitney                   |         |
|                                                                  | Controls vs mutant littermates |         |
| <i>KCl injection</i>                                             | n                              | p-value |
| K1                                                               | 16-17                          | 0.4827  |

699  
700

701

| Immunoautoradiography (Fig. 6I)                         |                |
|---------------------------------------------------------|----------------|
| VChTcKO-DMS mice                                        |                |
| Unpaired t-test                                         |                |
| AAV-GFP injected vs AAV-Cre-GFP injected mice (n=11-11) |                |
| VChT expression                                         |                |
| <i>Brain area</i>                                       | <i>p-value</i> |
| NAc                                                     | 0.1827         |
| DMS                                                     | 0.0007         |
| DLS                                                     | 0.2033         |
| VGLUT3 expression                                       |                |
| <i>Brain area</i>                                       | <i>p-value</i> |
| NAc                                                     | 0.4131         |
| DMS                                                     | 0.3176         |
| DLS                                                     | 0.5648         |

702

| Binge-like sucrose overconsumption model (Fig. 6J-L) |                     |                |
|------------------------------------------------------|---------------------|----------------|
| VChTcKO-DMS mice (n=11-11)                           |                     |                |
| Two-way ANOVA repeated measures                      |                     |                |
| AAV-GFP injected vs AAV-Cre-GFP injected mice        |                     |                |
| <i>Sucrose consumption - H0-H4 (Fig. 6J)</i>         | F-value             | <i>p-value</i> |
| Genotype                                             | $F_{1,20}=14.92$    | 0.0006         |
| Time (Days)                                          | $F_{15,300}=74.23$  | <0.0001        |
| Genotype x Time                                      | $F_{15,300}=1.484$  | 0.1096         |
| <i>Sucrose consumption - H0-H1 (Fig. 6K)</i>         | F-value             | <i>p-value</i> |
| Genotype                                             | $F_{1,20}=16.65$    | 0.001          |
| Time (Days)                                          | $F_{15,300}=37.11$  | <0.0001        |
| Genotype x Time                                      | $F_{15,300}=0.8331$ | 0.6404         |
| <i>Sucrose consumption - H1-H4 (Fig. 6L)</i>         | F-value             | <i>p-value</i> |
| Genotype                                             | $F_{1,20}=8.815$    | 0.0076         |
| Time (Days)                                          | $F_{15,300}=32.36$  | <0.0001        |
| Genotype x Time                                      | $F_{15,300}=1.406$  | 0.1426         |

703

704

705

| Activity-based anorexia model – survival (Fig. 6M) |       |                 |
|----------------------------------------------------|-------|-----------------|
| VChTcKO-DMS mice                                   |       |                 |
| Kaplan–Meier test                                  |       |                 |
| AAV-GFP injected vs AAV-Cre-GFP injected mice      |       |                 |
|                                                    | n     | <i>p</i> -value |
| Log-rank (Mantel-Cox) post hoc comparison          | 11-11 | 0.0189          |
| Gehan-Breslow-Wilcoxon post hoc comparison         | 11-11 | 0.0176          |

706

707



708  
709**Table S7 related to Fig. 7.**

| Activity-based anorexia model - survival (Fig. 7A,B)   |       |         |
|--------------------------------------------------------|-------|---------|
| Kaplan-Meier test                                      |       |         |
| Controls-saline vs mutant littermates-saline           |       |         |
|                                                        | n     | p-value |
| Log-rank (Mantel-Cox) post hoc comparison              | 10-10 | 0.0131  |
| Gehan-Breslow-Wilcoxon post hoc comparison             | 10-10 | 0.0259  |
| Controls-saline vs mutant littermates-L-Dopa           |       |         |
|                                                        | n     | p-value |
| Log-rank (Mantel-Cox) post hoc comparison              | 10-10 | 0.1369  |
| Gehan-Breslow-Wilcoxon post hoc comparison             | 10-10 | 0.0712  |
| Controls-saline vs Controls-L-Dopa                     |       |         |
|                                                        | n     | p-value |
| Log-rank (Mantel-Cox) post hoc comparison              | 10-10 | 0.0432  |
| Gehan-Breslow-Wilcoxon post hoc comparison             | 10-10 | 0.0257  |
| Mutant littermates-saline vs mutant littermates-L-Dopa |       |         |
|                                                        | n     | p-value |
| Log-rank (Mantel-Cox) post hoc comparison              | 10-10 | 0.0113  |
| Gehan-Breslow-Wilcoxon post hoc comparison             | 10-10 | 0.0283  |

710  
711

712

| Activity-based anorexia model - survival (Fig. 7C,D)      |     |         |
|-----------------------------------------------------------|-----|---------|
| Kaplan-Meier test                                         |     |         |
| Controls-saline vs mutant littermates-saline              |     |         |
|                                                           | n   | p-value |
| Log-rank (Mantel-Cox) post hoc comparison                 | 9-9 | 0.0215  |
| Gehan-Breslow-Wilcoxon post hoc comparison                | 9-9 | 0.0381  |
| Controls-saline vs mutant littermates-donepezil           |     |         |
|                                                           | n   | p-value |
| Log-rank (Mantel-Cox) post hoc comparison                 | 9-9 | 0.7196  |
| Gehan-Breslow-Wilcoxon post hoc comparison                | 9-9 | 0.7252  |
| Controls-saline vs Controls-donepezil                     |     |         |
|                                                           | n   | p-value |
| Log-rank (Mantel-Cox) post hoc comparison                 | 9-9 | 0.6900  |
| Gehan-Breslow-Wilcoxon post hoc comparison                | 9-9 | 0.7251  |
| Mutant littermates-saline vs mutant littermates-donepezil |     |         |
|                                                           | n   | p-value |
| Log-rank (Mantel-Cox) post hoc comparison                 | 9-9 | 0.0382  |
| Gehan-Breslow-Wilcoxon post hoc comparison                | 9-9 | 0.0670  |

713

714

715

716  
717  
718**Statistics for supplementary figures****Table S8: Statistics for Supplementary Figure 1.**

| Instrumental learning (Phase 1) – Reaction time (Supplementary Fig.1A) |                    |                 |
|------------------------------------------------------------------------|--------------------|-----------------|
| Two-way ANOVA – HC vs TCA (all patients)                               |                    |                 |
|                                                                        | F-value            | <i>p</i> -value |
| Group                                                                  | $F_{1,54}=1.800$   | 0.1853          |
| Training blocks                                                        | $F_{9,486}=38.73$  | <0.0001         |
| Group x blocks                                                         | $F_{9,486}=0.9070$ | 0.5187          |

719

| Instrumental learning (Phase 1) – Reaction time (Supplementary Fig.1B) |                    |                 |
|------------------------------------------------------------------------|--------------------|-----------------|
| Two-way ANOVA – HC vs ED-BP vs AN-R                                    |                    |                 |
|                                                                        | F-value            | <i>p</i> -value |
| Group                                                                  | $F_{2,53}=0.9873$  | 0.3793          |
| Training blocks                                                        | $F_{18,477}=35.86$ | <0.0001         |
| Group x blocks                                                         | $F_{18,477}=1.332$ | 0.1625          |

720

| Outcome devaluation (Phase 2) – Reaction time (Supplementary Fig.1C) |                 |
|----------------------------------------------------------------------|-----------------|
| Unpaired t-test – HC vs TCA (all patients)                           |                 |
|                                                                      | <i>p</i> -value |
|                                                                      | 0.3492          |

721

| Outcome devaluation (Phase 2) – Reaction time (Supplementary Fig.1D) |                 |
|----------------------------------------------------------------------|-----------------|
| One way ANOVA – HC vs ED-BP vs AN-R                                  |                 |
|                                                                      | <i>p</i> -value |
|                                                                      | 0.0685          |

722  
723

724 **Table S9: Statistics for Supplementary Figure 2**

| Immunohistochemistry (Supplementary Fig. 2C,D) |                                |         |                         |         |
|------------------------------------------------|--------------------------------|---------|-------------------------|---------|
|                                                | VGLUT3 in VGLUT3cKO mice       |         | VACHT in VGLUT3cKO mice |         |
|                                                | Unpaired t-test                |         |                         |         |
|                                                | Controls vs mutant littermates |         |                         |         |
| <i>Brain area</i>                              | n                              | p-value | n                       | p-value |
| NAc                                            | 5-5                            | <0.0001 | 5-5                     | 0.7777  |
| DMS                                            | 5-5                            | <0.0001 | 5-5                     | 0.4534  |
| DLS                                            | 5-5                            | <0.0001 | 5-5                     | 0.6541  |

| Immunohistochemistry (Supplementary Fig. 2E,F) |                                |         |                         |         |
|------------------------------------------------|--------------------------------|---------|-------------------------|---------|
|                                                | VACHT in VACHTcKO mice         |         | VGLUT3 in VACHTcKO mice |         |
|                                                | Unpaired t-test                |         |                         |         |
|                                                | Controls vs mutant littermates |         |                         |         |
| <i>Brain area</i>                              | n                              | p-value | n                       | p-value |
| NAc                                            | 6-5                            | 0.0015  | 6-5                     | 0.8886  |
| DMS                                            | 6-5                            | <0.0001 | 6-5                     | 0.5429  |
| DLS                                            | 6-5                            | <0.0001 | 6-5                     | 0.1437  |

| Microdialysis (Supplementary Fig. 2G) |                                |         |
|---------------------------------------|--------------------------------|---------|
|                                       | ACh in VACHTcKO mice           |         |
|                                       | unpaired t-test                |         |
|                                       | Controls vs mutant littermates |         |
| <i>Brain area</i>                     | n                              | p-value |
| Dorsal striatum                       | 7-7                            | 0.0221  |

727  
728

729 **Table S10: Statistics for Supplementary Figure 3**

730

| Western blots (Supplementary Fig. 3A-F and Supplementary Fig. 3I-K) |                                                     |         |                                                   |         |                                                           |         |
|---------------------------------------------------------------------|-----------------------------------------------------|---------|---------------------------------------------------|---------|-----------------------------------------------------------|---------|
|                                                                     | VGLUT3 in VGLUT3cKO mice<br>Supplementary Fig. 3A-C |         | VAcHT in VAcHTcKO mice<br>Supplementary Fig. 3D-F |         | VGLUT3 in VGLUT3cKO-D2CRE mice<br>Supplementary Fig. 3I-K |         |
|                                                                     | Unpaired t-test                                     |         |                                                   |         |                                                           |         |
|                                                                     | Controls vs mutant littermates                      |         |                                                   |         |                                                           |         |
| <i>Brain area</i>                                                   | n                                                   | p-value | n                                                 | p-value | n                                                         | p-value |
| Striatum                                                            | 4-4                                                 | 0.0083  | 4-4                                               | 0.0013  | 4-4                                                       | 0.0012  |
| Cortex                                                              | 4-4                                                 | 0.9545  | 4-4                                               | 0.0004  | 4-4                                                       | 0.2561  |
| Hippocampus                                                         | 4-4                                                 | 0.8596  | 4-4                                               | 0.7807  | 4-4                                                       | 0.842   |

731

| qPCR (Supplementary Fig. 3G,H) |                                           |         |                                                 |         |
|--------------------------------|-------------------------------------------|---------|-------------------------------------------------|---------|
|                                | VGLUT3cKO mice<br>(Supplementary Fig. 3G) |         | VGLUT3cKO-D2CRE mice<br>(Supplementary Fig. 3H) |         |
|                                | Unpaired t-test                           |         |                                                 |         |
|                                | Controls vs. mutant littermates           |         |                                                 |         |
| <i>Transcripts</i>             | n                                         | p-value | n                                               | p-value |
| VGLUT3                         | 4-4                                       | 0.002   | 4-6                                             | 0.0391  |
| VAcHT                          | 4-4                                       | 0.8645  | 4-6                                             | 0.6059  |
| ChAT                           | 4-4                                       | 0.5635  | 4-6                                             | 0.3183  |
| CHT1                           | 4-4                                       | 0.3906  | 4-6                                             | 0.183   |
| DRD1                           | 4-4                                       | 0.2503  | 4-6                                             | 0.1106  |
| DRD2                           | 4-4                                       | 0.681   | 4-6                                             | 0.5849  |

732

| Immunautoradiography (Supplementary Fig. 3L) |                                |         |
|----------------------------------------------|--------------------------------|---------|
|                                              | VGLUT3 in VGLUT3cKO-D2CRE mice |         |
|                                              | Unpaired t-test                |         |
|                                              | Controls vs mutant littermates |         |
| <i>Brain area</i>                            | n                              | p-value |
| NAc                                          | 5-5                            | 0.0358  |
| DMS                                          | 5-5                            | <0.0001 |
| DLS                                          | 5-5                            | <0.0001 |

733

734  
735**Table S11: Statistics for Supplementary Figure 4**

| Pairwise Discrimination task with Reversal (Supplementary Fig. 4A-C) |                                       |                 |
|----------------------------------------------------------------------|---------------------------------------|-----------------|
| VGLUT3cKO-D2CRE mice                                                 |                                       |                 |
|                                                                      | unpaired t-test                       |                 |
|                                                                      | Controls vs mutant littermates        |                 |
| <i>Task phase</i>                                                    | n                                     | <i>p</i> -value |
| Acquisition (Supplementary Fig. 4A)                                  | 13-13                                 | 0.8398          |
| Reversal (Supplementary Fig. 4B)                                     | 13-13                                 | 0.1583          |
|                                                                      | Two-way ANOVA (Supplementary Fig. 4C) |                 |
|                                                                      | Controls vs mutant littermates        |                 |
|                                                                      | F-value                               | <i>p</i> -value |
| Genotype                                                             | $F_{1,24}=1.853$                      | 0.1797          |
| Session                                                              | $F_{1,48}=39.06$                      | <0.0001         |
| Genotype x Session                                                   | $F_{1,48}=2.441$                      | 0.1248          |

736  
737

738 **Table S12: Statistics for Supplementary Figure 5**

739

| 5-Choice Serial Reaction Time Task (5-CSRTT, Supplementary Fig. 5A-C) |                    |         |
|-----------------------------------------------------------------------|--------------------|---------|
| VACHTcKO-DS mice                                                      |                    |         |
| Two-way ANOVA                                                         |                    |         |
| AAV-Cre-GFP injected vs AAV-GFP injected mice (n=9-9)                 |                    |         |
| <i>Number of training sessions</i><br>(Supplementary Fig. 5A)         | F-value            | p-value |
| Genotype                                                              | $F_{1,16}=0.03184$ | 0.8595  |
| Session                                                               | $F_{1,32}=0.9284$  | 0.3425  |
| Genotype x Session                                                    | $F_{1,32}=1.071$   | 0.3085  |
| <i>Accuracy</i><br>(Supplementary Fig. 5B)                            |                    |         |
| Genotype                                                              | $F_{1,64}=0.7635$  | 0.3855  |
| Session                                                               | $F_{3,64}=18.11$   | <0.0001 |
| Genotype x Session                                                    | $F_{3,64}=0.3216$  | 0.8097  |
| <i>Omission</i><br>(Supplementary Fig. 5C)                            |                    |         |
| Genotype                                                              | $F_{1,64}=0.1663$  | 0.6848  |
| Session                                                               | $F_{3,64}=25.56$   | <0.0001 |
| Genotype x Session                                                    | $F_{3,64}=0.1555$  | 0.9258  |

740

| 5-CSRTT (Supplementary Fig. 5D,E)                                         |                   |         |
|---------------------------------------------------------------------------|-------------------|---------|
| VACHTcKO mice - reward collection latency (Supplementary Fig. 5D, n=11-9) |                   |         |
| Two-way ANOVA                                                             |                   |         |
| Controls vs mutant littermates                                            |                   |         |
|                                                                           | F-value           | p-value |
| Genotype                                                                  | $F_{1,72}=0.0004$ | 0.9846  |
| Stimulus duration                                                         | $F_{7,72}=1.107$  | 0.3521  |
| Genotype x Stimulus duration                                              | $F_{7,72}=0.2045$ | 0.8929  |
| VACHTcKO mice – premature responses (Supplementary Fig. 5E, n=11-9)       |                   |         |
| Two-way ANOVA                                                             |                   |         |
| Controls vs mutant littermates                                            |                   |         |
|                                                                           | F-value           | p-value |
| Genotype                                                                  | $F_{1,72}=2.141$  | 0.1477  |
| Stimulus duration                                                         | $F_{7,72}=0.8809$ | 0.4552  |
| Genotype x Stimulus duration                                              | $F_{7,72}=0.5226$ | 0.6681  |

741

742 **Table S13: Statistics for Supplementary Figure 6**

| Extinction tests (Supplementary Fig. 6A-F) |                                                         |         |                                                               |         |
|--------------------------------------------|---------------------------------------------------------|---------|---------------------------------------------------------------|---------|
|                                            | VGLUT3cKO overtrained mice<br>(Supplementary Fig. 6A,B) |         | VGLUT3cKO-D2CRE overtrained<br>mice (Supplementary Fig. 6C,D) |         |
|                                            | Unpaired t-test                                         |         |                                                               |         |
|                                            | Controls vs mutant littermates                          |         |                                                               |         |
|                                            | n                                                       | p-value | n                                                             | p-value |
| Training                                   | 12-14                                                   | 0.7053  | 13-13                                                         | 0.0219  |
|                                            | Two-way ANOVA repeated measures                         |         |                                                               |         |
|                                            | Controls vs mutant littermates                          |         |                                                               |         |
| <i>Probe sessions</i>                      | F-value                                                 | p-value | F-value                                                       | p-value |
| Genotype                                   | $F_{1,24}=0.2363$                                       | 0.6313  | $F_{1,24}=0.6877$                                             | 0.4151  |
| Time                                       | $F_{5,120}=45.57$                                       | <0.0001 | $F_{5,120}=57.48$                                             | <0.0001 |
| Genotype x Time                            | $F_{5,120}=0.3684$                                      | 0.8694  | $F_{5,120}=1.328$                                             | 0.257   |
|                                            | VACHTcKO overtrained mice (Supplementary Fig. 6E,F)     |         |                                                               |         |
|                                            | Unpaired t-test                                         |         |                                                               |         |
|                                            | Controls vs mutant littermates                          |         |                                                               |         |
|                                            | n                                                       | p-value |                                                               |         |
| Training                                   | 14-11                                                   | 0.4086  |                                                               |         |
|                                            | Two-way ANOVA repeated measures                         |         |                                                               |         |
|                                            | Controls vs mutant littermates                          |         |                                                               |         |
| <i>Probe sessions</i>                      | F-value                                                 | p-value |                                                               |         |
| Genotype                                   | $F_{1,23}=13.4$                                         | 0.0013  |                                                               |         |
| Time                                       | $F_{5,115}=38.88$                                       | <0.0001 |                                                               |         |
| Genotype x Time                            | $F_{5,115}=2.77$                                        | 0.0212  |                                                               |         |

743

744



745 **Table S14: Statistics for Supplementary Figure 7**

| Devaluation after FR1 training – normalized data (Supplementary Fig. 7A) |                 |
|--------------------------------------------------------------------------|-----------------|
| Controls                                                                 | VGLUT3cKO mice  |
| One sample t-test again chance (0.5)                                     |                 |
|                                                                          | <i>p</i> -value |
| Controls valued                                                          | <0.0001         |
| Controls devalued                                                        | <0.0001         |
| VGLUT3cKO valued                                                         | 0.0003          |
| VGLUT3cKO devalued                                                       | 0.0003          |

746

| Sucrose self-administration - FR1 training (Supplementary Fig. 7B) |                            |                 |
|--------------------------------------------------------------------|----------------------------|-----------------|
| VGLUT3-KO mice (n=12-12)                                           |                            |                 |
| Two-way ANOVA repeated measures                                    |                            |                 |
| Controls vs mutant littermates                                     |                            |                 |
|                                                                    | F-value                    | <i>p</i> -value |
| Genotype                                                           | F <sub>1,22</sub> =3.630   | 0.0699          |
| Session                                                            | F <sub>11,242</sub> =26.16 | <0.0001         |
| Genotype x Session                                                 | F <sub>11,242</sub> =2.173 | 0.0165          |

747

| Devaluation after FR1 training (Supplementary Fig. 7C) |                 |                |                 |
|--------------------------------------------------------|-----------------|----------------|-----------------|
| Controls                                               |                 | VGLUT3-KO mice |                 |
| Paired t test                                          |                 |                |                 |
| Valued vs devalued condition                           |                 |                |                 |
| n                                                      | <i>p</i> -value | n              | <i>p</i> -value |
| 12                                                     | 0.0053          | 11             | 0.0131          |

748

| Devaluation after FR1 training – normalized data (Supplementary Fig. 7D) |                 |
|--------------------------------------------------------------------------|-----------------|
| Controls                                                                 | VGLUT3-KO mice  |
| One sample t-test again chance (0.5)                                     |                 |
|                                                                          | <i>p</i> -value |
| Controls valued                                                          | 0.0021          |
| Controls devalued                                                        | 0.0022          |
| VGLUT3-KO valued                                                         | 0.0014          |
| VGLUT3-KO devalued                                                       | 0.0015          |

749

750

751

| Devaluation after FR1 training – normalized data (Supplementary Fig. 7E) |                    |
|--------------------------------------------------------------------------|--------------------|
| Controls                                                                 | VACHTcKO male mice |
| One sample t-test again chance (0.5)                                     |                    |
|                                                                          | <i>p</i> -value    |
| Controls valued                                                          | 0.0222             |
| Controls devalued                                                        | 0.0222             |
| VACHTcKO valued                                                          | 0.2613             |
| VACHTcKO devalued                                                        | 0.2613             |

752

| Devaluation after FR1 training (Fig. 7F) |                  |                 |
|------------------------------------------|------------------|-----------------|
| Control male mice vs VACHTcKO male mice  |                  |                 |
| Two-way ANOVA                            |                  |                 |
|                                          | F-value          | <i>p</i> -value |
| Genotype                                 | $F_{1,44}=1.881$ | 0.1772          |
| Value                                    | $F_{1,44}=8.943$ | 0.0045          |
| Genotype x Value                         | $F_{1,44}=4.735$ | 0.0350          |

753

| Devaluation after FR1 training (Supplementary Fig. 7F) |                 |                    |                 |
|--------------------------------------------------------|-----------------|--------------------|-----------------|
| Controls                                               |                 | VACHTcKO male mice |                 |
| Paired t test                                          |                 |                    |                 |
| Valued vs devalued condition                           |                 |                    |                 |
| n                                                      | <i>p</i> -value | n                  | <i>p</i> -value |
| 12                                                     | 0.0146          | 12                 | 0.2756          |

754

| Devaluation after FR1 training – normalized data (Supplementary Fig. 7G) |                      |
|--------------------------------------------------------------------------|----------------------|
| Controls                                                                 | VACHTcKO female mice |
| One sample t-test again chance (0.5)                                     |                      |
|                                                                          | <i>p</i> -value      |
| Controls valued                                                          | 0.0046               |
| Controls devalued                                                        | 0.0046               |
| VACHTcKO valued                                                          | 0.1388               |
| VACHTcKO devalued                                                        | 0.1449               |

755

756

757

| Sucrose self-administration - 2 last days FR1 + RI training (Supplementary Fig. 7H) |                   |         |
|-------------------------------------------------------------------------------------|-------------------|---------|
| VGLUT3-KO mice (n=12-12)                                                            |                   |         |
| Two-way ANOVA repeated measures                                                     |                   |         |
| Controls vs mutant littermates                                                      |                   |         |
|                                                                                     | F-value           | p-value |
| Genotype                                                                            | $F_{1,22}=8.352$  | 0.0085  |
| Session                                                                             | $F_{9,198}=49.03$ | <0.0001 |
| Genotype x Session                                                                  | $F_{9,198}=4.225$ | <0.0001 |

758

| Devaluation after RI training – normalized data (Supplementary Fig. 7I) |                |
|-------------------------------------------------------------------------|----------------|
| Controls                                                                | VGLUT3cKO mice |
| One sample t-test against chance (0.5)                                  |                |
|                                                                         | p-value        |
| Controls valued                                                         | 0.1093         |
| Controls devalued                                                       | 0.1093         |
| VGLUT3cKO valued                                                        | 0.0063         |
| VGLUT3cKO devalued                                                      | 0.0065         |

759

| Devaluation after RI training (Supplementary Fig. 7J) |         |                |         |
|-------------------------------------------------------|---------|----------------|---------|
| Controls                                              |         | VGLUT3-KO mice |         |
| Paired t test                                         |         |                |         |
| Valued vs devalued condition                          |         |                |         |
| n                                                     | p-value | n              | p-value |
| 12                                                    | 0.7049  | 11             | 0.0042  |

760

| Sucrose self-administration - 2 last days FR1 + RI training (Supplementary Fig. 7K) |                   |         |  |
|-------------------------------------------------------------------------------------|-------------------|---------|--|
| VAcHTcKO mice (n=11-12)                                                             |                   |         |  |
| Two-way ANOVA repeated measures                                                     |                   |         |  |
| Controls vs mutant littermates                                                      |                   |         |  |
|                                                                                     | F-value           | p-value |  |
| Genotype                                                                            | $F_{1,21}=3.627$  | 0.0706  |  |
| Session                                                                             | $F_{9,189}=25.49$ | <0.0001 |  |
| Genotype x Session                                                                  | $F_{9,189}=2.247$ | 0.0208  |  |

761

762

763

| Devaluation after RI training (Supplementary Fig. 7L) |         |               |         |
|-------------------------------------------------------|---------|---------------|---------|
| Controls                                              |         | VACHTcKO mice |         |
| Paired t test                                         |         |               |         |
| Valued vs devalued condition                          |         |               |         |
| n                                                     | p-value | n             | p-value |
| 11                                                    | 0.7461  | 11            | 0.8594  |

764

| Devaluation after RI training – normalized data (Supplementary Fig. 7M) |                 |
|-------------------------------------------------------------------------|-----------------|
| Controls                                                                | VACHTcKO mice   |
| One sample t-test again chance (0.5)                                    |                 |
|                                                                         | <i>p</i> -value |
| Controls valued                                                         | 0.8326          |
| Controls devalued                                                       | 0.8326          |
| VGLUT3cKO valued                                                        | 0.4942          |
| VGLUT3cKO devalued                                                      | 0.4942          |

765

| Locomotion (Supplementary Fig. 7N) |       |                 |
|------------------------------------|-------|-----------------|
| Unpaired t test                    |       |                 |
| Controls vs. VACHTcKO littermates  |       |                 |
|                                    | n     | <i>p</i> -value |
| <i>Day 1</i>                       | 10-10 | 0.9760          |
| <i>Day 2</i>                       | 10-10 | 0.7735          |
| <i>Day 3</i>                       | 10-10 | 0.2527          |
| <i>Night</i>                       | 10-10 | 0.2129          |

766

| Progressive ratio test (Supplementary Fig. 7O)   |       |                 |
|--------------------------------------------------|-------|-----------------|
| Unpaired t test                                  |       |                 |
| Controls vs. VGLUT3-KO littermates               |       |                 |
|                                                  | n     | <i>p</i> -value |
| <i>Total number of nose pokes during session</i> | 12-12 | 0.9822          |
| <i>Breaking point</i>                            | 12-12 | 0.8863          |

767

768

769 **Table S15: Statistics for Supplementary Figure 9**

| Binge-like sucrose overconsumption model (Supplementary Fig. 9A-D) |                     |         |
|--------------------------------------------------------------------|---------------------|---------|
| VGLUT3cKO mice (n=10-10)                                           |                     |         |
| Two-way ANOVA repeated measures                                    |                     |         |
| Controls vs mutant littermates                                     |                     |         |
| <i>Sucrose consumption - H0-H1</i><br>(Supplementary Fig. 9A)      | F-value             | p-value |
| Genotype                                                           | $F_{1,18}=0.3360$   | 0.5693  |
| Time (Days)                                                        | $F_{11,198}=32.24$  | <0.0001 |
| Genotype x Time                                                    | $F_{11,198}=1.496$  | 0.1352  |
| <i>Sucrose consumption - H0-H4</i><br>(Supplementary Fig. 9B)      | F-value             | p-value |
| Genotype                                                           | $F_{1,18}=1.090$    | 0.3104  |
| Time (Days)                                                        | $F_{11,198}=52.59$  | <0.0001 |
| Genotype x Time                                                    | $F_{11,198}=0.9488$ | 0.4948  |
| <i>Water consumption</i><br>(Supplementary Fig. 9C)                | F-value             | p-value |
| Genotype                                                           | $F_{1,18}=0.3424$   | 0.5657  |
| Time (Days)                                                        | $F_{11,198}=10.21$  | <0.0001 |
| Genotype x Time                                                    | $F_{11,198}=1.559$  | 0.1133  |
| <i>Food consumption</i><br>(Supplementary Fig. 9D)                 | F-value             | p-value |
| Genotype                                                           | $F_{1,18}=1.221$    | 0.2837  |
| Time (Days)                                                        | $F_{11,198}=41.98$  | <0.0001 |
| Genotype x Time                                                    | $F_{11,198}=0.7811$ | 0.6587  |

770

771

772

773 **Table S16: Statistics for Supplementary Figure 10**

774

| Binge-like sucrose overconsumption model (Supplementary Fig. 10A-D)             |                             |         |
|---------------------------------------------------------------------------------|-----------------------------|---------|
| VACHTcKO mice                                                                   |                             |         |
| Two-way ANOVA repeated measures                                                 |                             |         |
| Controls vs mutant littermates                                                  |                             |         |
| <i>Food consumption - H0-H4 - male<br/>(Supplementary Fig. 10A, n=12-12)</i>    | F-value                     | p-value |
| Genotype                                                                        | F <sub>1,22</sub> =0.0856   | 0.7727  |
| Time (Days)                                                                     | F <sub>15,330</sub> =51.34  | <0.0001 |
| Genotype x Time                                                                 | F <sub>15,330</sub> =1.512  | 0.0988  |
| <i>Food consumption - H0-H4 - female<br/>(Supplementary Fig. 10B, n=13-11)</i>  | F-value                     | p-value |
| Genotype                                                                        | F <sub>1,22</sub> =0.2988   | 0.5901  |
| Time (Days)                                                                     | F <sub>15,330</sub> =25.37  | <0.0001 |
| Genotype x Time                                                                 | F <sub>15,30</sub> =0.9188  | 0.5433  |
| <i>Water consumption - H0-H4 - male<br/>(Supplementary Fig. 10C, n=12-12)</i>   | F-value                     | p-value |
| Genotype                                                                        | F <sub>1,22</sub> =0.6309   | 0.4355  |
| Time (Days)                                                                     | F <sub>15,330</sub> =11.66  | <0.0001 |
| Genotype x Time                                                                 | F <sub>15,330</sub> =0.5939 | 0.8795  |
| <i>Water consumption - H0-H4 - female<br/>(Supplementary Fig. 10D, n=13-11)</i> | F-value                     | p-value |
| Genotype                                                                        | F <sub>1,22</sub> =1.366    | 0.2549  |
| Time (Days)                                                                     | F <sub>15,330</sub> =15.30  | <0.0001 |
| Genotype x Time                                                                 | F <sub>15,330</sub> =0.5527 | 0.9091  |

775

| Food and water consumption H0-H1-male (Supplementary Fig. 10E-F) |       |         |
|------------------------------------------------------------------|-------|---------|
| VChTcKO mice                                                     |       |         |
| Unpaired t-test                                                  |       |         |
| Controls vs mutant littermates                                   |       |         |
|                                                                  | n     | p-value |
| <i>Food consumption</i><br>(Supplementary Fig. 10E)              | 12-12 | 0.4467  |
| <i>Water consumption</i><br>(Supplementary Fig. 10F)             | 12-12 | 0.8836  |

776

| Food and water consumption H0-H1-female (Supplementary Fig. 10G-H) |       |         |
|--------------------------------------------------------------------|-------|---------|
| VChTcKO mice                                                       |       |         |
| Unpaired t-test                                                    |       |         |
| Controls vs mutant littermates                                     |       |         |
|                                                                    | n     | p-value |
| <i>Food consumption</i><br>(Supplementary Fig. 10G)                | 11-13 | 0.5232  |
| <i>Water consumption</i><br>(Supplementary Fig. 10H)               | 11-13 | 0.5279  |

777

778

779

| Binge-like saccharine overconsumption model (Supplementary Fig. 10I-M) |                    |         |
|------------------------------------------------------------------------|--------------------|---------|
| VACHTcKO mice (n=11-9)                                                 |                    |         |
| Two-way ANOVA repeated measures                                        |                    |         |
| Controls vs mutant littermates                                         |                    |         |
| <i>Saccharine consumption - H0-H4</i><br>(Supplementary Fig. 10I)      | F-value            | p-value |
| Genotype                                                               | $F_{1,18}=2.675$   | 0.1193  |
| Time (Days)                                                            | $F_{8,144}=21.96$  | <0.0001 |
| Genotype x Time                                                        | $F_{8,144}=0.8928$ | 0.5243  |
| <i>Saccharine consumption - H0-H1</i><br>(Supplementary Fig. 10J)      | F-value            | p-value |
| Genotype                                                               | $F_{1,18}=5.051$   | 0.0374  |
| Time (Days)                                                            | $F_{8,144}=18.62$  | <0.0001 |
| Genotype x Time                                                        | $F_{8,144}=0.6513$ | 0.7334  |
| <i>Saccharine consumption - H1-H4</i><br>(Supplementary Fig. 10K)      | F-value            | p-value |
| Genotype                                                               | $F_{1,18}=0.3801$  | 0.5453  |
| Time (Days)                                                            | $F_{8,144}=13.31$  | <0.0001 |
| Genotype x Time                                                        | $F_{8,144}=1.501$  | 0.1618  |
| <i>Food consumption</i><br>(Supplementary Fig. 10L)                    | F-value            | p-value |
| Genotype                                                               | $F_{1,18}=47.53$   | <0.0001 |
| Time (Days)                                                            | $F_{8,144}=23.06$  | <0.0001 |
| Genotype x Time                                                        | $F_{8,144}=0.9925$ | 0.4445  |
| <i>Water consumption</i><br>(Supplementary Fig. 10M)                   | F-value            | p-value |
| Genotype                                                               | $F_{1,18}=3.234$   | 0.0889  |
| Time (Days)                                                            | $F_{8,144}=21.53$  | <0.0001 |
| Genotype x Time                                                        | $F_{8,144}=1.413$  | 0.1957  |

780

781



782

|                                             |         |
|---------------------------------------------|---------|
| Sucrose preference (Supplementary Fig. 10N) |         |
| VChTcKO mice                                |         |
| Unpaired t-test                             |         |
| Controls vs mutant littermates              |         |
| n                                           | p-value |
| 11-9                                        | 0.6742  |

783

|                                                                      |      |         |
|----------------------------------------------------------------------|------|---------|
| Sucrose consumption after glucose injection (Supplementary Fig. 10O) |      |         |
| VChTcKO mice                                                         |      |         |
| Unpaired t-test                                                      |      |         |
| Controls vs mutant littermates                                       |      |         |
|                                                                      | n    | p-value |
| H0-H4                                                                | 11-9 | 0.0065  |
| H0-H1                                                                | 11-9 | 0.0280  |
| H1-H4                                                                | 11-9 | 0.1621  |

784

785

| Sucrose consumption after chow preload (Supplementary Fig. 10P)     |       |                 |
|---------------------------------------------------------------------|-------|-----------------|
| VACHTcKO mice                                                       |       |                 |
| Unpaired t-test                                                     |       |                 |
| Controls vs mutant littermates                                      |       |                 |
|                                                                     | n     | <i>p</i> -value |
| H0-H4                                                               | 12-12 | 0.0303          |
| H0-H1                                                               | 12-12 | 0.0049          |
| H1-H4                                                               | 12-12 | 0.7266          |
| Food consumption during chow preload (Supplementary Fig. 10Q)       |       |                 |
| <i>p</i> -value                                                     |       |                 |
| 0.3153                                                              |       |                 |
| Sucrose consumption with high-caloric food (Supplementary Fig. 10R) |       |                 |
| VACHTcKO mice                                                       |       |                 |
| Unpaired t-test                                                     |       |                 |
| Controls vs mutant littermates                                      |       |                 |
|                                                                     | n     | <i>p</i> -value |
| H0-H4                                                               | 12-12 | 0.0012          |
| H0-H1                                                               | 12-12 | 0.0019          |
| H1-H4                                                               | 12-12 | 0.0594          |
| High-caloric food consumption (Supplementary Fig. 10S)              |       |                 |
| <i>p</i> -value                                                     |       |                 |
| 0.5297                                                              |       |                 |

786

787

788 **Table S17: Statistics for Supplementary Figure 11**

| Activity-based anorexia model - baseline (Supplementary Fig. 11A,B) |                    |         |
|---------------------------------------------------------------------|--------------------|---------|
| VGLUT3cKO mice (n=10-10)                                            |                    |         |
| Two-way ANOVA repeated measures                                     |                    |         |
| Controls vs mutant littermates                                      |                    |         |
| <i>Food intake</i><br>(Supplementary Fig. 11A)                      | F-value            | p-value |
| Genotype                                                            | $F_{1,18}=0.032$   | 0.8594  |
| Time (Days)                                                         | $F_{6,108}=43.14$  | <0.0001 |
| Genotype x Time                                                     | $F_{6,108}=1.392$  | 0.2242  |
| <i>Body weight</i><br>(Supplementary Fig. 11B)                      | F-value            | p-value |
| Genotype                                                            | $F_{1,18}=0.013$   | 0.9089  |
| Time (Days)                                                         | $F_{6,108}=72.91$  | <0.0001 |
| Genotype x Time                                                     | $F_{6,108}=0.2056$ | 0.9744  |

789

| Food intake during baseline of ABA model (Supplementary Fig. 11C,D) |                    |         |
|---------------------------------------------------------------------|--------------------|---------|
| VChTcKO mice                                                        |                    |         |
| Two-way ANOVA repeated measures                                     |                    |         |
| Controls vs mutant littermates                                      |                    |         |
| <i>Male (n=12-12)</i><br>(Supplementary Fig. 11C)                   | F-value            | p-value |
| Genotype                                                            | $F_{1,22}=0.0095$  | 0.9231  |
| Time (Days)                                                         | $F_{6,132}=84.69$  | <0.0001 |
| Genotype x Time                                                     | $F_{6,132}=0.6359$ | 0.7013  |
| <i>Female (n=11-13)</i><br>(Supplementary Fig. 11D)                 | F-value            | p-value |
| Genotype                                                            | $F_{1,22}=0.0337$  | 0.8560  |
| Time (Days)                                                         | $F_{6,132}=135.4$  | <0.0001 |
| Genotype x Time                                                     | $F_{6,132}=2.097$  | 0.0577  |

790

| Body weight during baseline of ABA model (Supplementary Fig. 11E,F) |                    |                 |
|---------------------------------------------------------------------|--------------------|-----------------|
| VChTcKO mice                                                        |                    |                 |
| Two-way ANOVA repeated measures                                     |                    |                 |
| Controls vs mutant littermates                                      |                    |                 |
| <i>Male (n=12-12)</i><br>(Supplementary Fig. 11E)                   | F-value            | <i>p</i> -value |
| Genotype                                                            | $F_{1,22}=0.9828$  | 0.3323          |
| Time (Days)                                                         | $F_{6,132}=17.23$  | <0.0001         |
| Genotype x Time                                                     | $F_{6,132}=0.9299$ | 0.4758          |
| <i>Female (n=11-13)</i><br>(Supplementary Fig. 11F)                 | F-value            | <i>p</i> -value |
| Genotype                                                            | $F_{1,22}=0.0119$  | 0.9138          |
| Time (Days)                                                         | $F_{6,132}=14.53$  | <0.0001         |
| Genotype x Time                                                     | $F_{6,132}=0.3201$ | 0.9255          |

791

| Activity-based anorexia model (Supplementary Fig. 11G) |                   |                 |
|--------------------------------------------------------|-------------------|-----------------|
| VGLUT3cKO mice (n=10-10)                               |                   |                 |
| Two-way ANOVA repeated measures                        |                   |                 |
| Controls vs mutant littermates                         |                   |                 |
| <i>Food intake</i><br>(Supplementary Fig. 11G)         | F-value           | <i>p</i> -value |
| Genotype                                               | $F_{1,18}=1.227$  | 0.2825          |
| Time (Days)                                            | $F_{7,126}=97.84$ | <0.0001         |
| Genotype x Time                                        | $F_{7,126}=1.380$ | 0.2194          |

792

| Activity-based anorexia model – survival (Supplementary Fig. 11H) |         |                 |
|-------------------------------------------------------------------|---------|-----------------|
| VGLUT3cKO mice                                                    |         |                 |
| Kaplan–Meier test                                                 |         |                 |
| Controls vs mutant littermates                                    |         |                 |
|                                                                   | n       | <i>p</i> -value |
| Log-rank (Mantel-Cox) post hoc comparison                         | n=10-10 | 0.9558          |
| Gehan-Breslow-Wilcoxon post hoc comparison                        | n=10-10 | 0.9674          |

793

| Activity-based anorexia model (Supplementary Fig. 11I,J)       |                   |         |
|----------------------------------------------------------------|-------------------|---------|
| Controls vs VACHTcKO (n=12-12 for males and 11-13 for females) |                   |         |
| Two-way ANOVA repeated measures                                |                   |         |
| <i>Food intake - males</i><br>(Supplementary Fig. 11I)         | F-value           | p-value |
| Genotype                                                       | $F_{1,22}=29.30$  | <0.0001 |
| Time (Days)                                                    | $F_{7,154}=62.68$ | <0.0001 |
| Genotype x Time                                                | $F_{7,154}=2.365$ | 0.0253  |
| <i>Food intake - females</i><br>(Supplementary Fig. 11J)       | F-value           | p-value |
| Genotype                                                       | $F_{1,22}=14.20$  | 0.0011  |
| Time (Days)                                                    | $F_{7,154}=34.92$ | <0.0001 |
| Genotype x Time                                                | $F_{7,154}=3.537$ | 0.0015  |

794  
795

796  
797**Table S18: Statistics for Supplementary Figure 13**

| Microdialysis (Supplementary Fig. 13A) |     |                 |
|----------------------------------------|-----|-----------------|
| DA in VAcHTcKO mice                    |     |                 |
| Unpaired t-test                        |     |                 |
| Controls vs mutant littermates         |     |                 |
| <i>Brain area</i>                      | n   | <i>p</i> -value |
| Dorsal striatum                        | 7-7 | 0.0221          |

798

| Voltammetry - DA release - dorsomedial striatum (DMS) (Supplementary Fig. 13B) |                  |                 |
|--------------------------------------------------------------------------------|------------------|-----------------|
| VGLUT3cKO mice (n=9-9)                                                         |                  |                 |
| Two-way ANOVA repeated measures                                                |                  |                 |
| Controls vs mutant littermates                                                 |                  |                 |
|                                                                                | F-value          | <i>p</i> -value |
| Genotype                                                                       | $F_{1,16}=7.099$ | 0.0170          |
| Injections                                                                     | $F_{3,48}=55.52$ | <0.0001         |
| Genotype x Injections                                                          | $F_{3,48}=5.155$ | 0.0038          |

799

| Voltammetry - DA release - dorsomedial striatum (DMS) (Supplementary Fig. 13C) |     |                 |
|--------------------------------------------------------------------------------|-----|-----------------|
| VGLUT3cKO mice                                                                 |     |                 |
| Mann Whitney                                                                   |     |                 |
| Controls vs mutant littermates                                                 |     |                 |
| <i>KCl injection</i>                                                           | n   | <i>p</i> -value |
| K1                                                                             | 9-9 | 0.0188          |

800

| Voltammetry - DA release - dorsolateral striatum (DLS) (Supplementary Fig. 13D) |                   |                 |
|---------------------------------------------------------------------------------|-------------------|-----------------|
| VGLUT3cKO mice (n=9-9)                                                          |                   |                 |
| Two-way ANOVA repeated measures                                                 |                   |                 |
| Controls vs mutant littermates                                                  |                   |                 |
|                                                                                 | F-value           | <i>p</i> -value |
| Genotype                                                                        | $F_{1,16}=0.1099$ | 0.7466          |
| Injections                                                                      | $F_{3,48}=52.85$  | <0.0001         |
| Genotype x Injections                                                           | $F_{3,48}=0.2886$ | 0.8334          |

801

802

| Voltammetry - DA release - dorsolateral striatum (DLS) (Supplementary Fig. 13E) |     |         |
|---------------------------------------------------------------------------------|-----|---------|
| VGLUT3cKO mice                                                                  |     |         |
| Mann Whitney                                                                    |     |         |
| Controls vs mutant littermates                                                  |     |         |
| <i>KCl injection</i>                                                            | n   | p-value |
| K1                                                                              | 9-9 | 0.7137  |

803

| Voltammetry - DA release - dorsomedial striatum (DMS) (Supplementary Fig. 13F) |                  |         |
|--------------------------------------------------------------------------------|------------------|---------|
| VGLUT3-KO mice (n=16-14)                                                       |                  |         |
| Two-way ANOVA repeated measures                                                |                  |         |
| Controls vs mutant littermates                                                 |                  |         |
|                                                                                | F-value          | p-value |
| Genotype                                                                       | $F_{1,28}=6.711$ | 0.0150  |
| Injections                                                                     | $F_{3,84}=113.2$ | <0.0001 |
| Genotype x Injections                                                          | $F_{3,84}=3.801$ | 0.0131  |

804

| Voltammetry - DA release - dorsomedial striatum (DMS) (Supplementary Fig. 13G) |       |         |
|--------------------------------------------------------------------------------|-------|---------|
| VGLUT3-KO mice                                                                 |       |         |
| Mann Whitney                                                                   |       |         |
| Controls vs mutant littermates                                                 |       |         |
| <i>KCl injection</i>                                                           | n     | p-value |
| K1                                                                             | 16-14 | 0.0103  |
| K2                                                                             | 16-14 | 0.3083  |
| K3                                                                             | 16-14 | 0.4919  |
| K4                                                                             | 16-14 | 0.0620  |

805

| Voltammetry - T80 - dorsomedial striatum (DMS) (Supplementary Fig. 13H) |                   |         |
|-------------------------------------------------------------------------|-------------------|---------|
| VGLUT3-KO mice (n=16-14)                                                |                   |         |
| Two-way ANOVA repeated measures                                         |                   |         |
| Controls vs mutant littermates                                          |                   |         |
|                                                                         | F-value           | p-value |
| Genotype                                                                | $F_{1,28}=0.7270$ | 0.4011  |
| Injections                                                              | $F_{3,84}=42.21$  | 0.0001  |
| Genotype x Injections                                                   | $F_{3,84}=0.0956$ | 0.9623  |

806

807

| Voltammetry - T80 – dorsomedial striatum (DMS) (Supplementary Fig. 13H) |       |         |
|-------------------------------------------------------------------------|-------|---------|
| VGLUT3-KO mice (n=16-14)                                                |       |         |
| Mann Whitney                                                            |       |         |
| Controls vs mutant littermates                                          |       |         |
| <i>KCl injection</i>                                                    | n     | p-value |
| K1                                                                      | 16-14 | 0.9100  |
| K2                                                                      | 16-14 | 0.0316  |
| K3                                                                      | 16-14 | 0.0392  |
| K4                                                                      | 16-14 | 0.0013  |

808

| Voltammetry - DA release - dorsolateral striatum (DLS) (Supplementary Fig. 13I) |                   |         |
|---------------------------------------------------------------------------------|-------------------|---------|
| VGLUT3-KO mice (n=16-17)                                                        |                   |         |
| Two-way ANOVA repeated measures                                                 |                   |         |
| Controls vs mutant littermates                                                  |                   |         |
|                                                                                 | F-value           | p-value |
| Genotype                                                                        | $F_{1,31}=0.3360$ | 0.1112  |
| Injections                                                                      | $F_{3,93}=75.75$  | 0.0001  |
| Genotype x Injections                                                           | $F_{3,93}=0.3360$ | 0.7993  |

809

| Voltammetry - DA release - dorsolateral striatum (DLS) (Supplementary Fig. 13J) |       |         |
|---------------------------------------------------------------------------------|-------|---------|
| VGLUT3-KO mice                                                                  |       |         |
| Mann Whitney                                                                    |       |         |
| Controls vs mutant littermates                                                  |       |         |
| <i>KCl injection</i>                                                            | n     | p-value |
| K1                                                                              | 16-17 | 0.3985  |
| K2                                                                              | 16-17 | 0.0106  |
| K3                                                                              | 16-17 | 0.2006  |
| K4                                                                              | 16-17 | 0.2072  |

810

| Voltammetry - T80 - dorsolateral striatum (DLS) (Supplementary Fig. 13K) |                   |         |
|--------------------------------------------------------------------------|-------------------|---------|
| VGLUT3-KO mice (n=16-16)                                                 |                   |         |
| Two-way ANOVA repeated measures                                          |                   |         |
| Controls vs mutant littermates                                           |                   |         |
|                                                                          | F-value           | p-value |
| Genotype                                                                 | $F_{1,30}=0.5997$ | 0.4448  |
| Injections                                                               | $F_{3,90}=70.39$  | 0.0001  |
| Genotype x Injections                                                    | $F_{3,90}=0.3169$ | 0.8131  |

811

812



| Voltammetry - T80 - dorsolateral striatum (DLS) (Supplementary Fig. 13K) |       |         |
|--------------------------------------------------------------------------|-------|---------|
| VGLUT3-KO mice                                                           |       |         |
| Mann Whitney                                                             |       |         |
| Controls vs mutant littermates                                           |       |         |
| <i>KCl injection</i>                                                     | n     | p-value |
| K1                                                                       | 16-16 | 0.8001  |
| K2                                                                       | 16-16 | 0.1036  |
| K3                                                                       | 16-16 | 0.8307  |
| K4                                                                       | 16-16 | 0.6619  |

813

| Voltammetry - T80 - dorsomedial striatum (DMS) (Supplementary Fig. 13L,M) |                                                    |         |                                                     |         |
|---------------------------------------------------------------------------|----------------------------------------------------|---------|-----------------------------------------------------|---------|
|                                                                           | VGLUT3cKO mice (n=9-9)<br>(Supplementary Fig. 13L) |         | VAcHTcKO mice (n=11-16)<br>(Supplementary Fig. 13L) |         |
| Two-way ANOVA repeated measures                                           |                                                    |         |                                                     |         |
| Controls vs mutant littermates                                            |                                                    |         |                                                     |         |
|                                                                           | F-value                                            | p-value | F-value                                             | p-value |
| Genotype                                                                  | $F_{1,16}=0.1153$                                  | 0.7386  | $F_{1,25}=6.148$                                    | 0.0217  |
| Injections                                                                | $F_{3,48}=20.98$                                   | <0.0001 | $F_{3,75}=51.73$                                    | <0.0001 |
| Genotype x Injections                                                     | $F_{3,48}=0.0919$                                  | 0.9642  | $F_{3,75}=6.148$                                    | 0.0471  |

814

| Voltammetry - T80 - dorsomedial striatum (DMS) (Supplementary Fig. 13L,M) |                |         |               |         |
|---------------------------------------------------------------------------|----------------|---------|---------------|---------|
|                                                                           | VGLUT3cKO mice |         | VAcHTcKO mice |         |
| Mann Whitney                                                              |                |         |               |         |
| Controls vs mutant littermates                                            |                |         |               |         |
| <i>KCl injection</i>                                                      | n              | p-value | n             | p-value |
| K1                                                                        | 9-9            | 0.9090  | 10-13         | 0.0492  |
| K2                                                                        | 9-9            | 0.6502  | 10-13         | 0.4734  |
| K3                                                                        | 9-9            | 0.6517  | 10-13         | 0.3051  |
| K4                                                                        | 9-9            | 0.8421  | 10-13         | 0.8433  |

815

| Voltammetry - T80 - dorsolateral striatum (DLS) (Supplementary Fig. 13N,O) |                        |         |                         |         |
|----------------------------------------------------------------------------|------------------------|---------|-------------------------|---------|
|                                                                            | VGLUT3cKO mice (n=8-9) |         | VAcHTcKO mice (n=16-17) |         |
| Two-way repeated measures                                                  |                        |         |                         |         |
| Controls vs mutant littermates                                             |                        |         |                         |         |
|                                                                            | F-value                | p-value | F-value                 | p-value |
| Genotype                                                                   | $F_{1,15}=1.310$       | 0.2704  | $F_{1,31}=3.323$        | 0.0787  |
| Injections                                                                 | $F_{3,45}=27.30$       | <0.0001 | $F_{3,93}=43.16$        | <0.0001 |
| Genotype x Injections                                                      | $F_{3,45}=1.230$       | 0.3098  | $F_{3,93}=2.957$        | 0.0368  |

816

| Voltammetry - T80 - dorsolateral striatum (DLS) (Supplementary Fig. 12N,O) |                                |                 |               |                 |
|----------------------------------------------------------------------------|--------------------------------|-----------------|---------------|-----------------|
|                                                                            | VGLUT3cKO mice                 |                 | VAcHTcKO mice |                 |
|                                                                            | Mann Whitney                   |                 |               |                 |
|                                                                            | Controls vs mutant littermates |                 |               |                 |
| <i>KCl injection</i>                                                       | n                              | <i>p</i> -value | n             | <i>p</i> -value |
| K1                                                                         | 9-9                            | 0.3088          | 16-17         | 0.0713          |
| K2                                                                         | 9-9                            | 0.3568          | 16-17         | 0.9147          |
| K3                                                                         | 9-9                            | 0.9056          | 16-17         | 0.0766          |
| K4                                                                         | 9-9                            | 0.1316          | 16-17         | 0.0482          |

817

| Voltammetry - DA release - dorsomedial striatum (DMS) (Supplementary Fig. 12P) |                                |                 |               |                 |
|--------------------------------------------------------------------------------|--------------------------------|-----------------|---------------|-----------------|
|                                                                                | VGLUT3cKO mice                 |                 | VAcHTcKO mice |                 |
|                                                                                | Mann Whitney                   |                 |               |                 |
|                                                                                | Controls vs mutant littermates |                 |               |                 |
| <i>KCl injection</i>                                                           | n                              | <i>p</i> -value | n             | <i>p</i> -value |
| K2                                                                             | 9-9                            | 0.9090          | 11-16         | 0.0271          |
| K3                                                                             | 9-9                            | >0.9999         | 11-16         | 0.0484          |
| K4                                                                             | 9-9                            | 0.8142          | 11-16         | 0.0045          |

818

| Voltammetry - DA release - dorsolateral striatum (DLS) (Supplementary Fig. 12Q) |                                |                 |               |                 |
|---------------------------------------------------------------------------------|--------------------------------|-----------------|---------------|-----------------|
|                                                                                 | VGLUT3cKO mice                 |                 | VAcHTcKO mice |                 |
|                                                                                 | Mann Whitney                   |                 |               |                 |
|                                                                                 | Controls vs mutant littermates |                 |               |                 |
| <i>KCl injection</i>                                                            | n                              | <i>p</i> -value | n             | <i>p</i> -value |
| K2                                                                              | 9-9                            | 0.7475          | 16-17         | 0.7285          |
| K3                                                                              | 9-9                            | 0.9518          | 16-17         | 0.5633          |
| K4                                                                              | 9-9                            | 0.1883          | 16-17         | 0.4073          |

819

820

821 **Table S19: Statistics for Supplementary Figure 14**

| Binge-like sucrose overconsumption model (Supplementary Fig. 14A,B) |                     |         |
|---------------------------------------------------------------------|---------------------|---------|
| VChTcKO-DMS mice (n=11-11)                                          |                     |         |
| <i>Food consumption H0-H4</i><br>(Supplementary Fig. 14A)           | F-value             | p-value |
| Genotype                                                            | $F_{1,20}=0.4283$   | 0.5203  |
| Time (Days)                                                         | $F_{15,300}=9.975$  | <0.0001 |
| Genotype x Time                                                     | $F_{15,300}=0.7358$ | 0.7475  |
| <i>Water consumption H0-H4</i><br>(Supplementary Fig. 14B)          | F-value             | p-value |
| Genotype                                                            | $F_{15,300}=0.7430$ | 0.3989  |
| Time (Days)                                                         | $F_{15,300}=1.838$  | 0.0292  |
| Genotype x Time                                                     | $F_{15,300}=0.5433$ | 0.9149  |

822

| Sucrose preference (Supplementary Fig. 14C)   |         |
|-----------------------------------------------|---------|
| VChTcKO-DMS mice                              |         |
| Unpaired t-test                               |         |
| AAV-GFP injected vs AAV-Cre-GFP injected mice |         |
| n                                             | p-value |
| 11-11                                         | 0.7067  |

823

| Sucrose consumption after chow preload (Supplementary Fig. 14D) |       |         |
|-----------------------------------------------------------------|-------|---------|
| VChTcKO-DMS mice                                                |       |         |
| unpaired t-test                                                 |       |         |
| AAV-GFP injected vs AAV-Cre-GFP injected mice                   |       |         |
|                                                                 | n     | p-value |
| H0-H4                                                           | 11-11 | 0.0151  |
| H0-H1                                                           | 11-11 | 0.0140  |
| H1-H4                                                           | 11-11 | 0.136   |

824

| Food consumption during chow preload (Supplementary Fig. 14E) |         |         |
|---------------------------------------------------------------|---------|---------|
| VChTcKO-DMS mice                                              |         |         |
| Unpaired t-test                                               |         |         |
| AAV-GFP injected vs AAV-Cre-GFP injected mice                 |         |         |
|                                                               | n       | p-value |
| H0-H4                                                         | n=11-11 | 0.8752  |

825

826

827 **Table S20: Statistics for Supplementary Figure 15**

| Activity-based anorexia model – L-DOPA treatment – BASELINE<br>(Supplementary Figure 15A,B)                       |                     |         |
|-------------------------------------------------------------------------------------------------------------------|---------------------|---------|
| Two-way ANOVA repeated measures                                                                                   |                     |         |
| Controls-saline vs mutant littermates-saline, Controls-L-Dopa and mutant littermates-L-Dopa (n=10 for each group) |                     |         |
| <i>Body weight</i><br>(Supplementary Fig. 15A)                                                                    | F-value             | p-value |
| Group                                                                                                             | $F_{3,36}=0.1780$   | 0.9106  |
| Time (Days)                                                                                                       | $F_{18,216}=51.66$  | <0.0001 |
| Group x Time                                                                                                      | $F_{18,216}=0.6168$ | 0.8846  |
| <i>Food intake</i><br>(Supplementary Fig. 15B)                                                                    | F-value             | p-value |
| Group                                                                                                             | $F_{3,36}=0.0866$   | 0.9669  |
| Time (Days)                                                                                                       | $F_{18,216}=242.1$  | <0.0001 |
| Group x Time                                                                                                      | $F_{18,216}=1.265$  | 0.2132  |

828

| Activity-based anorexia model – Donepezil treatment – BASELINE<br>(Supplementary Figure 15C,D)                    |                     |         |
|-------------------------------------------------------------------------------------------------------------------|---------------------|---------|
| Two-way ANOVA repeated measures                                                                                   |                     |         |
| Controls-saline vs mutant littermates-saline, Controls-L-Dopa and mutant littermates-L-Dopa (n=10 for each group) |                     |         |
| <i>Body weight</i><br>(Supplementary Fig. 15C)                                                                    | F-value             | p-value |
| Group                                                                                                             | $F_{3,36}=0.1342$   | 0.9391  |
| Time (Days)                                                                                                       | $F_{18,216}=12.84$  | <0.0001 |
| Group x Time                                                                                                      | $F_{18,216}=0.5735$ | 0.9161  |
| <i>Food intake</i><br>(Supplementary Fig. 15D)                                                                    | F-value             | p-value |
| Group                                                                                                             | $F_{3,36}=0.1038$   | 0.9573  |
| Time (Days)                                                                                                       | $F_{18,216}=40.90$  | <0.0001 |
| Group x Time                                                                                                      | $F_{18,216}=0.9838$ | 0.4795  |

829

830

831

| Activity-based anorexia model – L-DOPA treatment (Supplementary Figure 15E)                                       |                    |         |
|-------------------------------------------------------------------------------------------------------------------|--------------------|---------|
| Two-way ANOVA repeated measures                                                                                   |                    |         |
| Controls-saline vs mutant littermates-saline, Controls-L-Dopa and mutant littermates-L-Dopa (n=10 for each group) |                    |         |
| <i>Food intake</i><br>(Supplementary Fig. 15E)                                                                    | F-value            | p-value |
| Group                                                                                                             | $F_{3,36}=5.217$   | 0.0043  |
| Time (Days)                                                                                                       | $F_{7,252}=27.73$  | <0.0001 |
| Group x Time                                                                                                      | $F_{21,252}=1.417$ | 0.1101  |

832

| Activity-based anorexia model – L-DOPA treatment (Supplementary Figure 15E)                                       |                    |         |
|-------------------------------------------------------------------------------------------------------------------|--------------------|---------|
| Three-way ANOVA                                                                                                   |                    |         |
| Controls-saline vs mutant littermates-saline, Controls-L-Dopa and mutant littermates-L-Dopa (n=10 for each group) |                    |         |
| <i>Food intake</i><br>(Supplementary Fig. 15F)                                                                    | F-value            | p-value |
| Group                                                                                                             | $F_{1,160}=26.96$  | <0.0001 |
| Time (Days)                                                                                                       | $F_{7,160}=10.03$  | <0.0001 |
| Drug                                                                                                              | $F_{1,160}=30.41$  | <0.0001 |
| Group x Time                                                                                                      | $F_{7,160}=1.705$  | 0.1112  |
| Drug x Time                                                                                                       | $F_{7,160}=0.8561$ | 0.5427  |
| Group x Drug                                                                                                      | $F_{1,160}=4.419$  | 0.0371  |
| Group x Drug x Time                                                                                               | $F_{7,160}=1.005$  | 0.4297  |

833

834

835

| Activity-based anorexia model - Donepezil treatment (Supplementary Figure 15F)                                         |                    |         |
|------------------------------------------------------------------------------------------------------------------------|--------------------|---------|
| Two-way ANOVA repeated measures                                                                                        |                    |         |
| Controls-saline vs mutant littermates-saline, Controls-donepezil and mutant littermates-donepezil (n=9 for each group) |                    |         |
| <i>Food intake</i><br>(Supplementary Fig. 15F)                                                                         | F-value            | p-value |
| Group                                                                                                                  | $F_{3,32}=4.682$   | 0.0080  |
| Time (Days)                                                                                                            | $F_{7,224}=40.88$  | <0.0001 |
| Group x Time                                                                                                           | $F_{21,224}=2.800$ | 0.0522  |

836

| Activity-based anorexia model – Donepezil treatment (Supplementary Figure 15F)                                    |                    |         |
|-------------------------------------------------------------------------------------------------------------------|--------------------|---------|
| Three-way ANOVA                                                                                                   |                    |         |
| Controls-saline vs mutant littermates-saline, Controls-L-Dopa and mutant littermates-L-Dopa (n=10 for each group) |                    |         |
| <i>Food intake</i><br>(Supplementary Fig. 15F)                                                                    | F-value            | p-value |
| Group                                                                                                             | $F_{1,256}=35.48$  | <0.0001 |
| Time (Days)                                                                                                       | $F_{7,256}=21.00$  | <0.0001 |
| Drug                                                                                                              | $F_{1,256}=14.58$  | 0.0002  |
| Group x Time                                                                                                      | $F_{7,256}=0.9648$ | 0.4575  |
| Drug x Time                                                                                                       | $F_{7,256}=0.5554$ | 0.7916  |
| Group x Drug                                                                                                      | $F_{1,256}=11.71$  | 0.0007  |
| Group x Drug x Time                                                                                               | $F_{7,256}=0.9354$ | 0.4796  |

837

838 **Table S21: Statistics for Supplementary Figure 16**

839

| Food consumption during chow preload (Supplementary Figure 16A,B)              |         |         |
|--------------------------------------------------------------------------------|---------|---------|
| VGLUT3cKO mice                                                                 |         |         |
| Unpaired t-test                                                                |         |         |
| Controls vs mutant littermates                                                 |         |         |
|                                                                                | n       | p-value |
| Conso. regular food during prefeeding -(after FR1) Supplementary Figure 16A    | n=11-12 | 0.6168  |
| Conso. sucrose pellets during prefeeding (after FR1) Supplementary Figure 16A  | n=11-12 | 0.1794  |
| Conso. sucrose pellets during prefeeding -(after FR1) Supplementary Figure 16B | n=10-13 | 0.8055  |
| Conso. sucrose pellets during prefeeding (after RI) Supplementary Figure 16B   | n=10-13 | 0.3818  |

840

| Food consumption during chow preload (Supplementary Figure 16C,D)              |         |         |
|--------------------------------------------------------------------------------|---------|---------|
| VGLUT3-KO mice                                                                 |         |         |
| Unpaired t-test                                                                |         |         |
| Controls vs mutant littermates                                                 |         |         |
|                                                                                | n       | p-value |
| Conso. regular food during prefeeding -(after FR1) Supplementary Figure 16C    | n=11-12 | 0.2959  |
| Conso. sucrose pellets during prefeeding (after FR1) Supplementary Figure 16C  | n=11-12 | 0.9969  |
| Conso. sucrose pellets during prefeeding -(after FR1) Supplementary Figure 16D | n=11-12 | 0.8260  |
| Conso. sucrose pellets during prefeeding (after RI) Supplementary Figure 16D   | n=11-12 | 0.7733  |

841

842

843

| Food consumption during chow preload (Supplementary Figure 16E,F)                 |         |         |
|-----------------------------------------------------------------------------------|---------|---------|
| VChTcKO male mice                                                                 |         |         |
| Unpaired t-test                                                                   |         |         |
| Controls vs mutant littermates                                                    |         |         |
|                                                                                   | N       | p-value |
| Conso. regular food during prefeeding -(after FR1)<br>Supplementary Figure 16E    | n=12-12 | 0.3357  |
| Conso. sucrose pellets during prefeeding (after FR1)<br>Supplementary Figure 16E  | n=12-12 | 0.5599  |
| Conso. sucrose pellets during prefeeding -(after FR1)<br>Supplementary Figure 16F | n=11-11 | 0.3576  |
| Conso. sucrose pellets during prefeeding (after RI)<br>Supplementary Figure 16F   | n=11-11 | 0.7237  |

844

| Food consumption during chow preload (Supplementary Figure 16G)                  |         |         |
|----------------------------------------------------------------------------------|---------|---------|
| VChTcKO female mice                                                              |         |         |
| Unpaired t-test                                                                  |         |         |
| Controls vs mutant littermates                                                   |         |         |
|                                                                                  | N       | p-value |
| Conso. regular food during prefeeding -(after FR1)<br>Supplementary Figure 16E   | n=11-13 | 0.6211  |
| Conso. sucrose pellets during prefeeding (after FR1)<br>Supplementary Figure 16E | n=11-13 | 0.8820  |

845

| Ratio sucrose/(sucrose+food) during chow preload (Supplementary Figure 16 H,I,J) |         |         |
|----------------------------------------------------------------------------------|---------|---------|
| Unpaired t-test                                                                  |         |         |
| Controls vs mutant littermates                                                   |         |         |
|                                                                                  | N       | p-value |
| VChTcKO females (after FR1)<br>Supplementary Figure 16H                          | n=11-13 | 0.4816  |
| VChTcKO males (after FR1)<br>Supplementary Figure 16I                            | n=12-12 | 0.5232  |
| VChTcKO males (after RI)<br>Supplementary Figure 16J                             | n=11-11 | 0.6102  |

846

847



848

## Supplementary Figures, Text and Tables

849

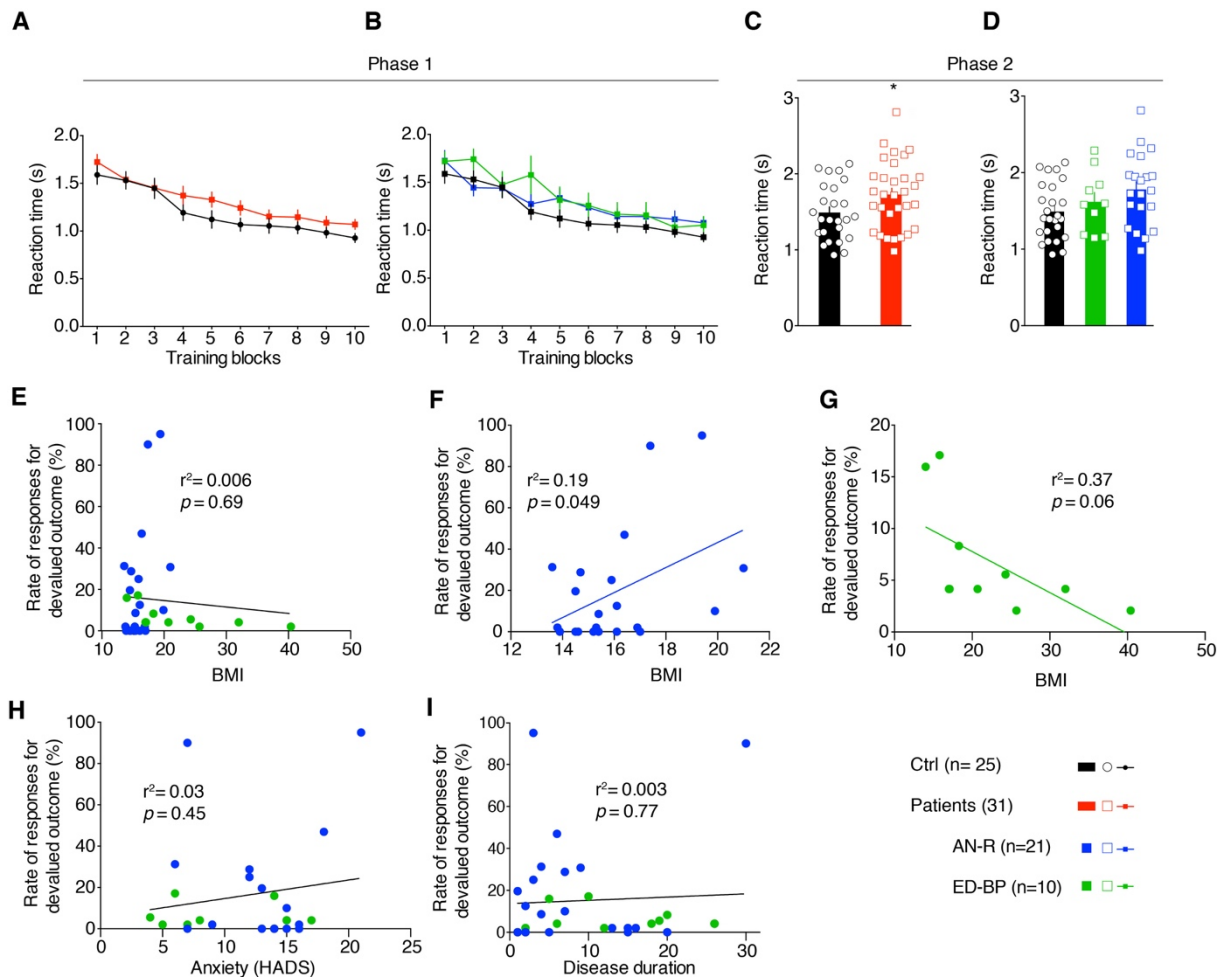

850

851 **Supplementary Figure 1.**

852 Analysis of eating disorder patients and healthy controls using a computer-based  
853 neurocognitive task.

854 (A) Mean reaction time across the training blocks of phase-1 (instrumental learning stage) for  
855 patients with eating disorders and healthy controls. (B) Mean reaction time across the  
856 training blocks of phase-1 (instrumental learning stage) for AN-R patients, ED-BP patients  
857 and healthy controls. (C) Mean reaction time during phase-2 (outcome devaluation stage)  
858 for patients with eating disorders and healthy controls. (D) Mean reaction time during phase-  
859 2 (outcome devaluation stage) for AN-R patients, ED-BP patients and healthy controls. (E-  
860 G) Simple linear regression between rate of responses for devalued outcome (phase-3) and  
861 the body mass index (BMI) of ED patients. (H) Simple linear regression between rate of  
862 responses for devalued outcome (phase-3) and anxiety (HADS) of ED patients. (I) Simple  
863 linear regression between rate of responses for devalued outcome (phase-3) and disease  
864 duration of ED patients. Two-way ANOVA repeated measures for (A), (B) unpaired t-test for

865 (C), one-way ANOVA followed by Dunnett post-hoc test for (D). Pearson linear regression for  
866 (E) to (I).  
867  
868

869

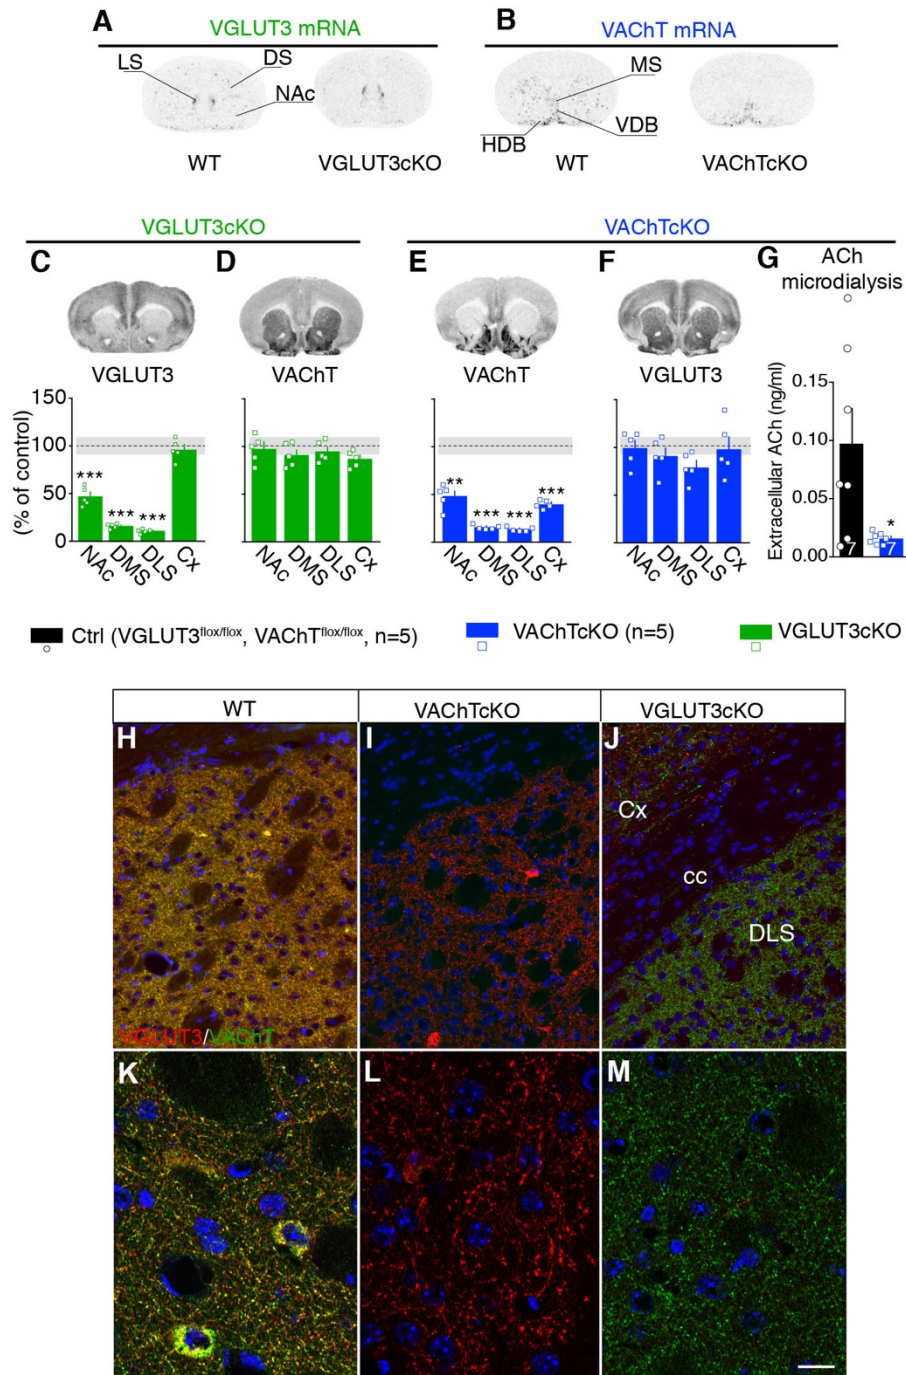

887

888 **Supplementary Figure 2.**

889 **Anatomical validation of VGLUT3cKO mice and VACHTcKO mice.**

890 (A-G) VACHT or VGLUT3 expressions were characterized by *in situ* hybridization (A,B) and  
 891 immunohistochemistry (C-G) in the striatum of VACHTcKO mice and VGLUT3cKO mice.

892 (A) VGLUT3 transcript was deleted from the striatum of VGLUT3cKO mice but was still

893 present in other areas (septum, cortex or basal forebrain). (B) VACHT mRNA was absent

894 from the dorsal striatum (DS) and nucleus accumbens (NAc) of VAcHTcKO mice but was still  
895 detected in the diagonal band (HDB). **(C)** At the protein level, VGLUT3 expression was  
896 almost completely deleted in the DMS and in the DLS of VGLUT3cKO mice. However, 50%  
897 of the protein was still present in the ventral striatum or NAc of mutant mice. **(D)** VAcHT  
898 expression was not affected in the striatum of VGLUT3cKO mice. **(E)** VAcHT expression was  
899 removed from the dorsal striatum of VAcHTcKO mice. Around 50% of the protein was still  
900 expressed in the NAc and  $\approx$  40% in the cortex of VAcHTcKO mice. **(F)** In contrast, VGLUT3  
901 expression was not affected in VAcHTcKO mice. **(G)** Extracellular ACh release in control  
902 mice and VAcHTcKO mice measured by *in vivo* microdialysis. **(H-M)** Immunofluorescent  
903 labelling of VGLUT3 (in red) or VAcHT (in green) in the dorsal striatum of VGLUT3cKO mice  
904 or VAcHTcKO mice demonstrating specificity of transporter deletion. Nuclei are stained in  
905 blue (DAPI). Scale bars (in M): 50 $\mu$ m for h-j and 15 $\mu$ m for k-m. cc, corpus callosum; Cx,  
906 cerebral cortex; DMS, dorsomedial striatum. DLS, dorsolateral striatum; DS, dorsal striatum;  
907 HDB, horizontal diagonal band; NAc, nucleus accumbens; VDB, Vertical diagonal band.  
908 Unpaired t-test for (C-G). \* $p$ <0.05, \*\* $p$ <0.01, \*\*\* $p$ <0.001. All data are mean  $\pm$  SEM.

909

910

911

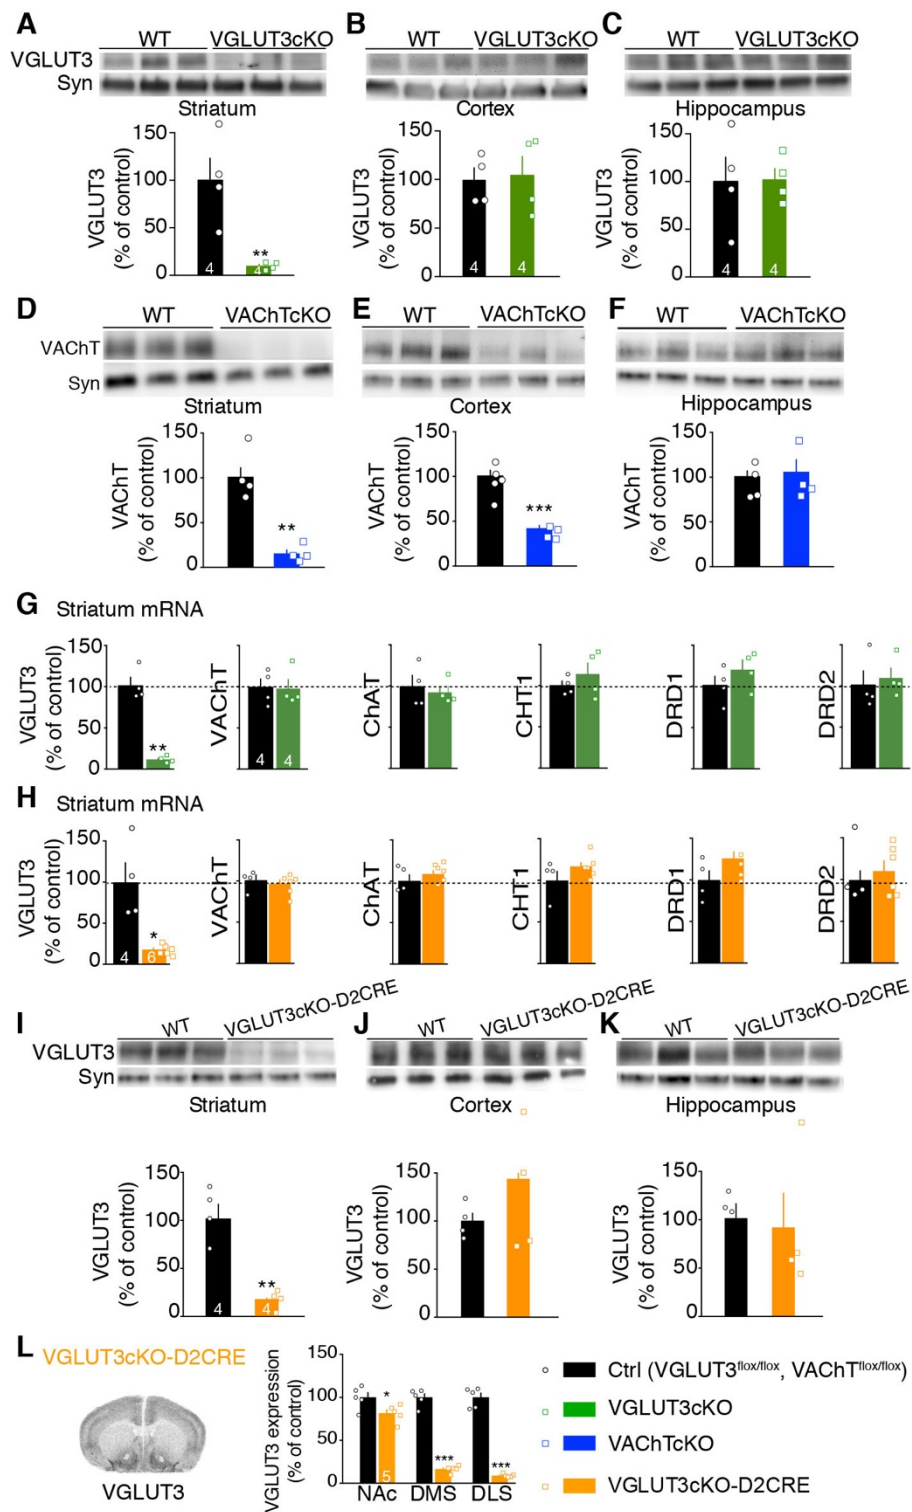

954

955 **Supplementary Figure 3.**

956 **Additional anatomical validation of VGLUT3 or VACHT deletion.**

957 (A-C) Quantification by Western blot of VGLUT3 in the striatum (A), cortex (B) and  
958 hippocampus (C) of VGLUT3cKO mice and controls. VGLUT3 was dramatically reduced

959 from the striatum of VGLUT3cKO mice whereas no modifications were observed in the  
960 cortex or hippocampus. **(D-F)** Quantification of VACHT in the striatum **(D)**, cortex **(E)** and  
961 hippocampus **(F)** of VACHTcKO mice and controls. VACHT protein was almost completely  
962 deleted from the striatum whereas its expression was not modified in the hippocampus.  
963 However, a 50% decrease of VACHT expression was detected in the cortex of VACHTcKO  
964 mice suggesting that cholinergic neurons from the basal forebrain (projecting to the cortex)  
965 express the D2 receptor. **(G-H)** Quantification by RT-qPCR of transcripts coding for VGLUT3,  
966 VACHT, ChAT, CHT1, DRD1 and DRD2 in VGLUT3cKO **(G)** and VGLUT3cKO-D2CRE mice  
967 **(H)**. VGLUT3 mRNA was selectively removed from the striatum of both mutant lines.  
968 VGLUT3 deletion did not impact the expression of cholinergic markers like VACHT, ChAT,  
969 CHT1 neither impacted DRD2 or DRD1 receptors expression. Quantifications are expressed  
970 as % of littermate controls. **(I-K)** Quantification by Western blot of VGLUT3 in VGLUT3cKO-  
971 D2CRE mice and controls in the striatum **(I)**, cortex **(J)** and hippocampus **(K)**. VGLUT3 was  
972 selectively removed from the striatum of VGLUT3cKO-D2CRE mice. **(L)** Quantification of  
973 VGLUT3 expression in the striatum of VGLUT3cKO-D2CRE mice by  
974 immunautoradiography. As observed with VGLUT3cKO mice, VGLUT3 expression was  
975 markedly decreased in the DMS and in the DLS but more moderately in the NAc of  
976 VGLUT3cKO-D2CRE mice. Unpaired t-test for (A-L). \* $p < 0.05$ , \*\* $p < 0.01$ , \*\*\* $p < 0.001$ . All data  
977 are mean  $\pm$  SEM.  
978

979

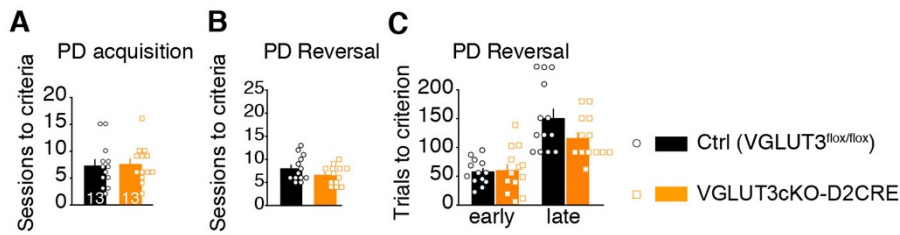

980

981

982 **Supplementary Figure 4.**983 **Pairwise visual discrimination task in VGLUT3cKO-D2CRE.**984 **(A-C)** Performance of VGLUT3cKO-D2CRE mice (n=13) and littermate controls (n=13)985 during pairwise discrimination task with reversal. **(A)** Performance in the acquisition phase of  
986 the task expressed as the number of training sessions required until the mice reached criteria  
987 (80% correct responses out of 30 completed trials in two consecutive sessions). **(B)**

988 Performance in the reversal phase of the task. Number of training sessions required for mice

989 to criteria (same as for acquisition). **(C)** Performance of mice during the early and late

990 phases of reversal. Unpaired t-test for (A) and (B). Two-way ANOVA for (C) and Bonferroni's

991 post hoc comparison. All data are mean ± SEM.

992

993

994

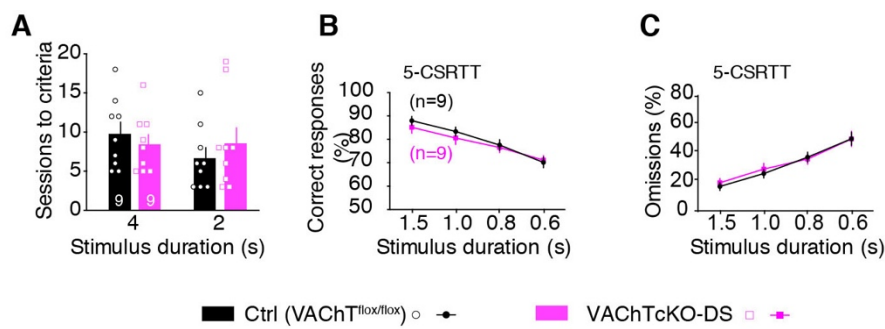

1000

1001 **Supplementary Figure 5.**

1002 **Cognitive evaluation of mice lacking VAcHT in the dorsal striatum using the 5-CSRTT**  
 1003 **and impact of VAcHT genetic deletion on inhibitory control in mice.**

1004 **(A-C)** Five-choice serial-reaction time task (5-CSRTT) was used to assess attention in  
 1005 VAcHTcKO-DS mice (n=9) and controls (n=9). **(A)** Number of training sessions required to  
 1006 reach criteria. **(B)** Response accuracy during probe sessions with decreasing stimulus  
 1007 duration. **(C)** Percentage of omitted responses during probe sessions. VAcHTcKO-DS mice  
 1008 performed similarly as controls during 5-CSRTT, showing that these mice did not suffer from  
 1009 any attentional deficit. Two-way ANOVA for (A-C) and Bonferroni's post hoc comparison. All  
 1010 data are mean  $\pm$  SEM.

1011



1012

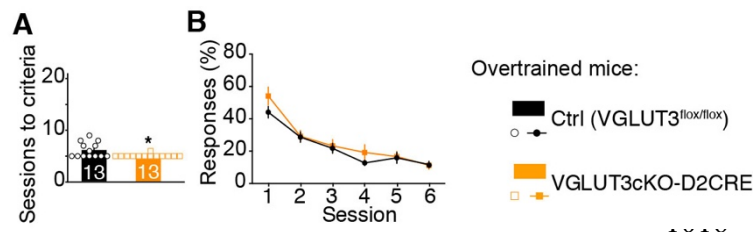

1017

1018 **Supplementary Figure 6.**1019 **Extinction tests using touchscreen tasks with overtrained mice**

1020 **(A, B)** Extinction tests were performed in mice that were trained in other touchscreen tasks  
 1021 previously. **(A)** Number of training sessions required for VGLUT3cKO-D2CRE mice learn the  
 1022 task. **(B)** Extinction response for VGLUT3cKO-D2CRE mice. Unpaired t-test for (A), Two-way  
 1023 ANOVA repeated measures for (B) and Bonferroni's post hoc comparison. \* $p < 0.05$ . All data  
 1024 are mean  $\pm$  SEM.

1025

1026

1027

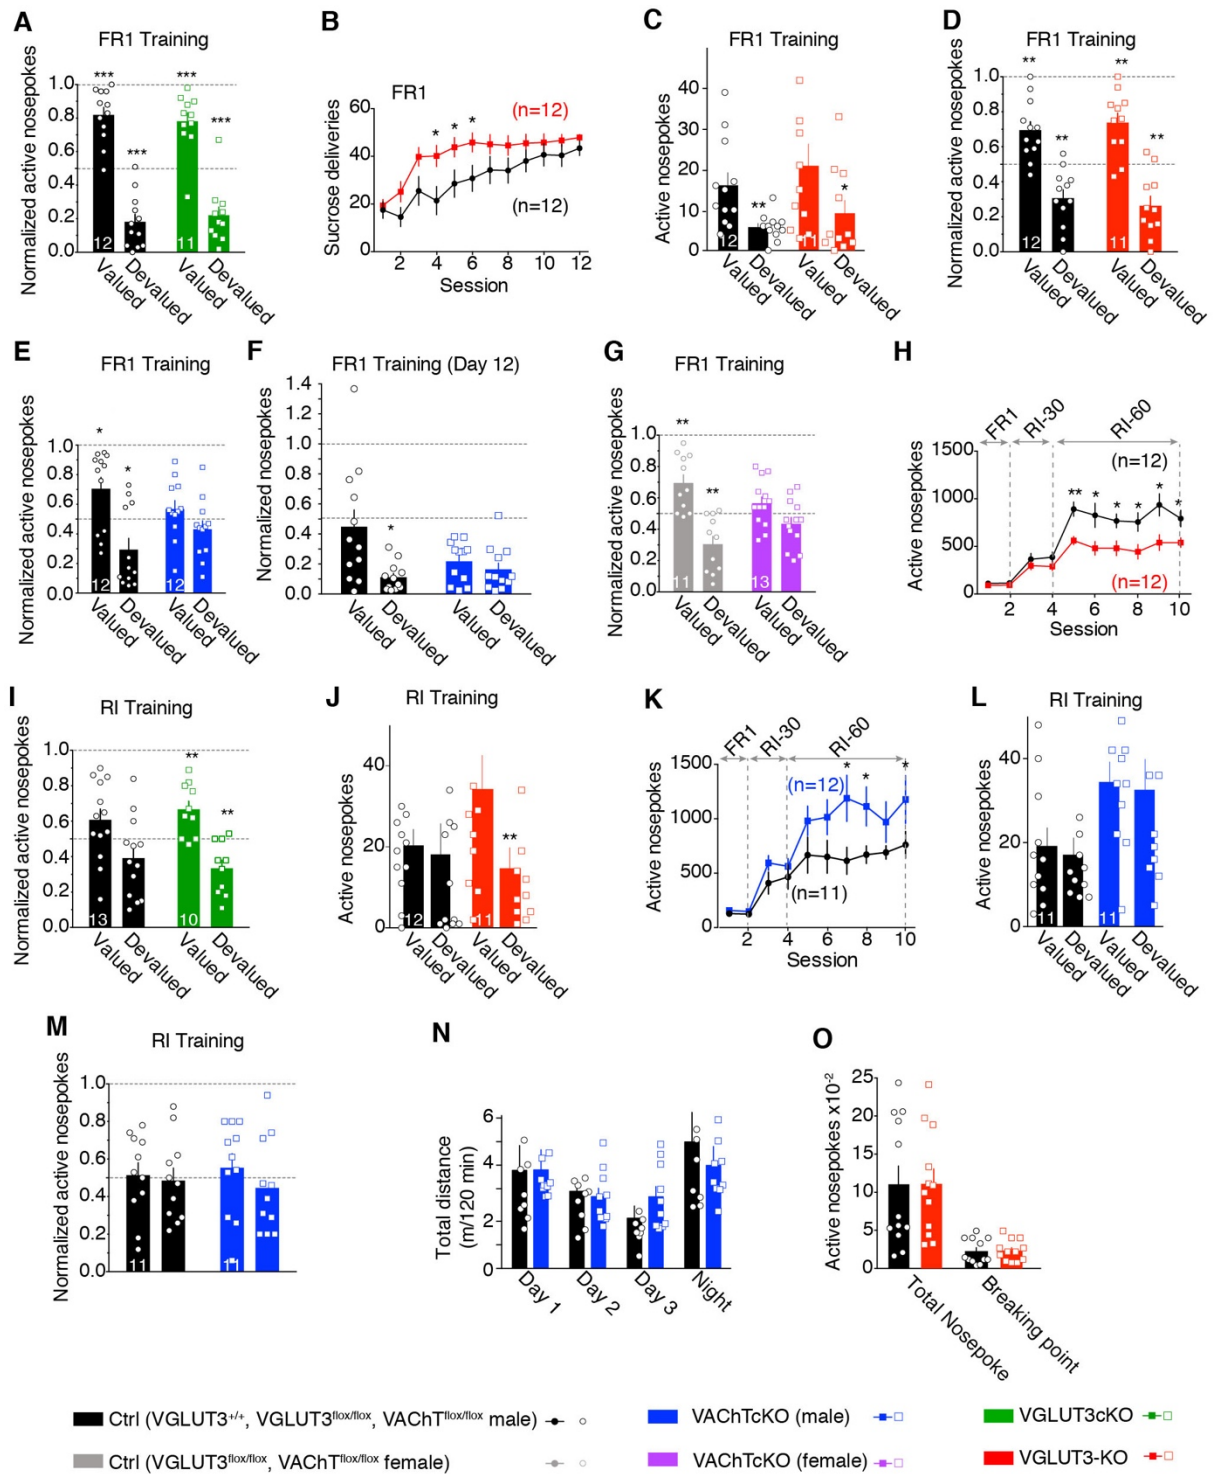

1028

1029 **Supplementary Figure 7.**

1030 **Normalized performance devaluation tests for all lines, VGLUT3-KO constitutive mice**  
 1031 **and VAcHTcKO mice performance in RI training compared to control littermates,**  
 1032 **locomotor activity of VAcHTcKO mice vs controls and motivation (PR) of VGLUT3-KO**  
 1033 **mice.**

1034

1035 **(A)** Normalized performance of VGLUT3cKO mice and controls during devaluation test after  
1036 FR1 training. **(B)** Number of sucrose deliveries during the initial instrumental training (FR1)  
1037 for VGLUT3-KO mice and control littermates. **(C)** Number of active nosepekes during  
1038 devaluation tests after FR1 initial training for VGLUT3-KO mice and controls, showing they  
1039 are both sensitive to devaluation (goal-directed behavior). **(D)** Normalized performance of  
1040 VGLUT3-KO mice and controls during devaluation test after FR1 training. **(E)** Normalized  
1041 performance of VACHTcKO mice and controls during devaluation test after FR1 training. **(F)**  
1042 Normalized performance by last day training performance of male VACHTcKO mice and  
1043 controls during devaluation test after FR1 training. **(G)** Normalized performance of female  
1044 VACHTcKO mice and controls during devaluation test after FR1 training. **(H)** Number of  
1045 active nosepekes during the initial and late phases of random-interval (RI) training (RI-30 and  
1046 RI-60) for VGLUT3-KO mice and control littermates. Note the decreased nosepoke activity  
1047 during RI training for VGLUT3-KO mice compared to controls. **(I)** Normalized performance of  
1048 VGLUT3cKO mice and controls during devaluation test after RI training. **(J)** Number of active  
1049 nosepekes during devaluation tests after RI training for VGLUT3-KO mice and controls,  
1050 showing that controls developed habits (same performance in valued and devalued  
1051 conditions), whereas VGLUT3-KO mice are stuck in goal-directed behaviors. **(K)** Number of  
1052 active nosepekes during the initial and late phases of random-interval (RI) training (RI-30 and  
1053 RI-60) for VACHTcKO mice and control littermates. Note the increased nosepoke activity  
1054 during RI training for VACHTcKO mice compared to controls. **(L)** Number of active  
1055 nosepekes during devaluation tests after RI training for AChTcKO mice and controls,  
1056 showing that both genotypes developed habitual behavior. **(M)** Normalized performance of  
1057 VACHTcKO mice and controls during devaluation test after RI training. **(N)** Locomotor activity  
1058 of VACHTcKO mice and control littermates in a new or a familiar environment (Day 1, 2 and  
1059 3), and during day and night periods. **(O)** Progressive ratio for VGLUT3-KO mice and  
1060 controls. Two-way ANOVA repeated measures for (B), (H), (K) and post hoc comparison with  
1061 the method of contrasts. One way sample t-test for (A), (D), (E), (G), (I), (M). (B), (D), (F).  
1062 Paired t-test for (C), (J), (L). Unpaired t-test for (N), (O). \* $p < 0.05$ , \*\* $p < 0.01$ , \*\*\* $p < 0.001$ . All  
1063 data are mean  $\pm$  SEM.

1064

1065

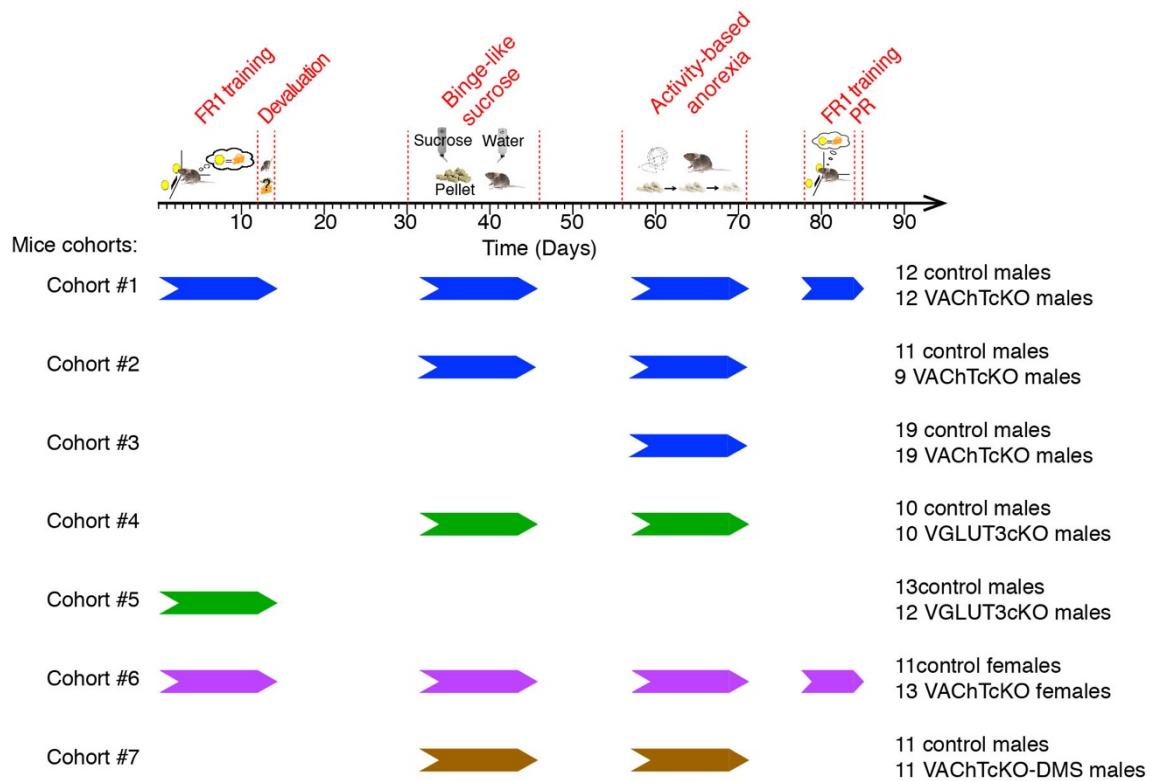

1066

1067 **Supplementary Figure 8.**1068 **Experimental design and major cohorts of mice used in behavioral experiments.**

1069 - Cohorts 1 and 6 were used to perform longitudinal experiments (goal-directed  
 1070 behaviors/habits evaluation, sucrose binge, ABA) described on Figure 3F-H and Fig. 4B-D, I.  
 1071 Results obtained with these animals were also used to perform statistical analyses shown on  
 1072 Figure 5.

1073 - Cohort 2 was used to perform controls for binge and activity-based anorexia models.

1074 Results collected with these mice are shown on Supplementary Figures 10 and 11

1075 - Cohort 3 was used to perform pharmacological experiments described on Figure 7.

1076 - Cohort 4 was used for experiments described on Supplementary Fig. 9.

1077 - Cohort 5 was used for experiments described on Figure 3B-E.

1078 - Cohort 7: AAV-CRE (VChTcKO-DMS) or AAV-GFP (controls) were used for experiments  
 1079 described on Figure 6I-M.

1080

1081

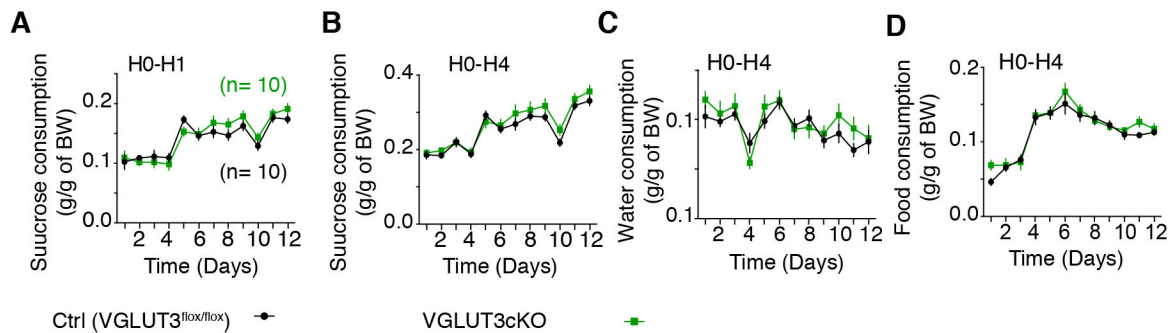

1082

1083 **Supplementary Figure 9.**1084 **Performance of VGLUT3cKO mice during binge-like sucrose overconsumption model.**

1085 **(A-D)** Binge-like sucrose overconsumption model. **(A)** Sucrose consumption during the first  
 1086 hour of access (H0-H1) for VGLUT3cKO mice (n=10) and littermates controls (n=10). **(B)**  
 1087 Sucrose consumption during the total duration of access (H0-H4) for VGLUT3cKO mice and  
 1088 controls. **(C)** Water consumption during the total duration of access for VGLUT3cKO mice  
 1089 and controls. **(D)** Food consumption during the total duration of access for VGLUT3cKO mice  
 1090 and controls. Two-way ANOVA repeated measures for (A) to (D) and post hoc comparison  
 1091 with the method of contrasts. All data are mean  $\pm$  SEM.

1092

1093

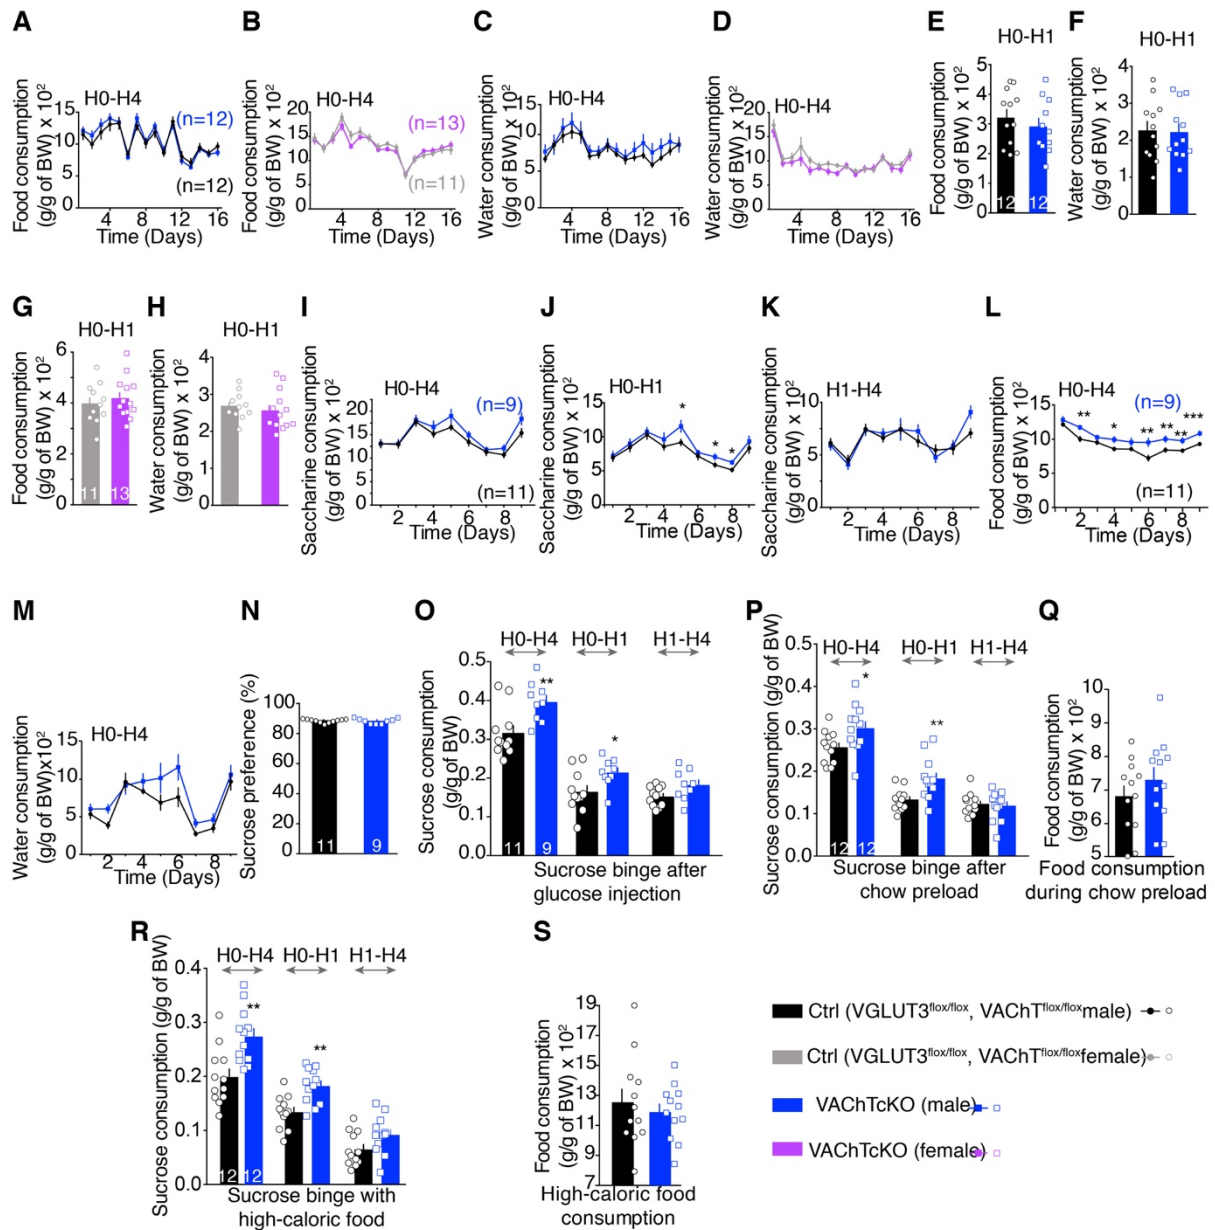

1094

1095 **Supplementary Figure 10.**1096 **VACHtCKO mice and littermate controls during sucrose binge-like overconsumption.**

1097 **(A-H)** Binge-like sucrose overconsumption model. **(A)** Food consumption during the total duration  
 1098 of access (H0-H4) for male VACHtCKO mice and control mice. **(B)** Food consumption during  
 1099 the total duration of access (H0-H4) for female VACHtCKO mice and control mice. **(C)**  
 1100 water consumption during the total duration of access for male VACHtCKO mice and controls. **(D)**  
 1101 Water consumption during the total duration of access for female VACHtCKO mice and  
 1102 control mice. **(E)** Food consumption during the 1<sup>st</sup> hour of access (H0-H1) for male  
 1103 VACHtCKO mice and control mice after 16 days of sucrose binge-like model. **(F)** Water  
 1104 consumption during the 1<sup>st</sup> hour of access (H0-H1) for male VACHtCKO mice and control

1105 mice after 16 days of sucrose binge-like model. **(G)** Food consumption during the 1<sup>st</sup> hour of  
1106 access (H0-H1) for female VAcHTcKO mice and control mice after 16 days of sucrose binge-  
1107 like model. **(H)** Water consumption during the 1<sup>st</sup> hour of access (H0-H1) for female  
1108 VAcHTcKO mice and control mice after 16 days of sucrose binge-like model. **(I-M)**  
1109 Saccharine binge-like overconsumption model. Saccharine (a non-caloric sweetener) was  
1110 tested instead of sucrose in the binge-like overconsumption model **(I)** Saccharine  
1111 consumption during the total duration of access for VAcHTcKO males and control mice (H0-  
1112 H4) **(J)** Saccharine consumption during the 1<sup>st</sup> hour of access (H0-H1) for VAcHTcKO males  
1113 and control mice. **(K)** Saccharine consumption during the 3 last hours of access (H1-H4) for  
1114 VAcHTcKO mice and control mice. **(L)** Food consumption during the total duration of access  
1115 for VAcHTcKO mice and control mice (H0-H4). **(M)** Water consumption during the total  
1116 duration of access for VAcHTcKO mice and control mice (H0-H4). Note that VAcHTcKO  
1117 males consumed significantly more saccharine than controls during the 1<sup>st</sup> hour of access  
1118 and more food during the total duration of the test. **(N)** Two-bottle choice procedure to  
1119 determine preference for sucrose solution over water with VAcHTcKO mice and littermate  
1120 controls. **(O-Q)** Sucrose consumption by mice trained to sucrose binge for 16 days was  
1121 measured after exposing animals to an intraperitoneal injection of glucose solution 30  
1122 minutes before the session or after *ad libitum* food for one hour (“chow preload”). **(O)**  
1123 Sucrose consumption during the total duration of access (H0-H4) in glucose injected male  
1124 mice. **(P)** Sucrose consumption after chow pre-load in different periods of testing (H0-H4).  
1125 **(Q)** Food consumption during chow preload for male VAcHTcKO mice and controls. Note  
1126 that after glucose injection or chow preload, VAcHTcKO mice binged significantly more  
1127 sucrose than control mice. **(R)** Sucrose consumption when appetitive food (high fat/high  
1128 sugar pellets) was used instead of regular food for VAcHTcKO male mice and controls. **(S)**  
1129 Consumption of high-caloric food for VAcHTcKO male mice and controls. Two-way ANOVA  
1130 repeated measures for (A) to (D), (I) to (M) and post hoc comparison with the method of  
1131 contrasts. Unpaired t-test for (E) to (H), and (N) to (S). \* $p < 0.05$ , \*\* $p < 0.01$ , \*\*\* $p < 0.001$ . All  
1132 data are mean  $\pm$  SEM.

1133



1134

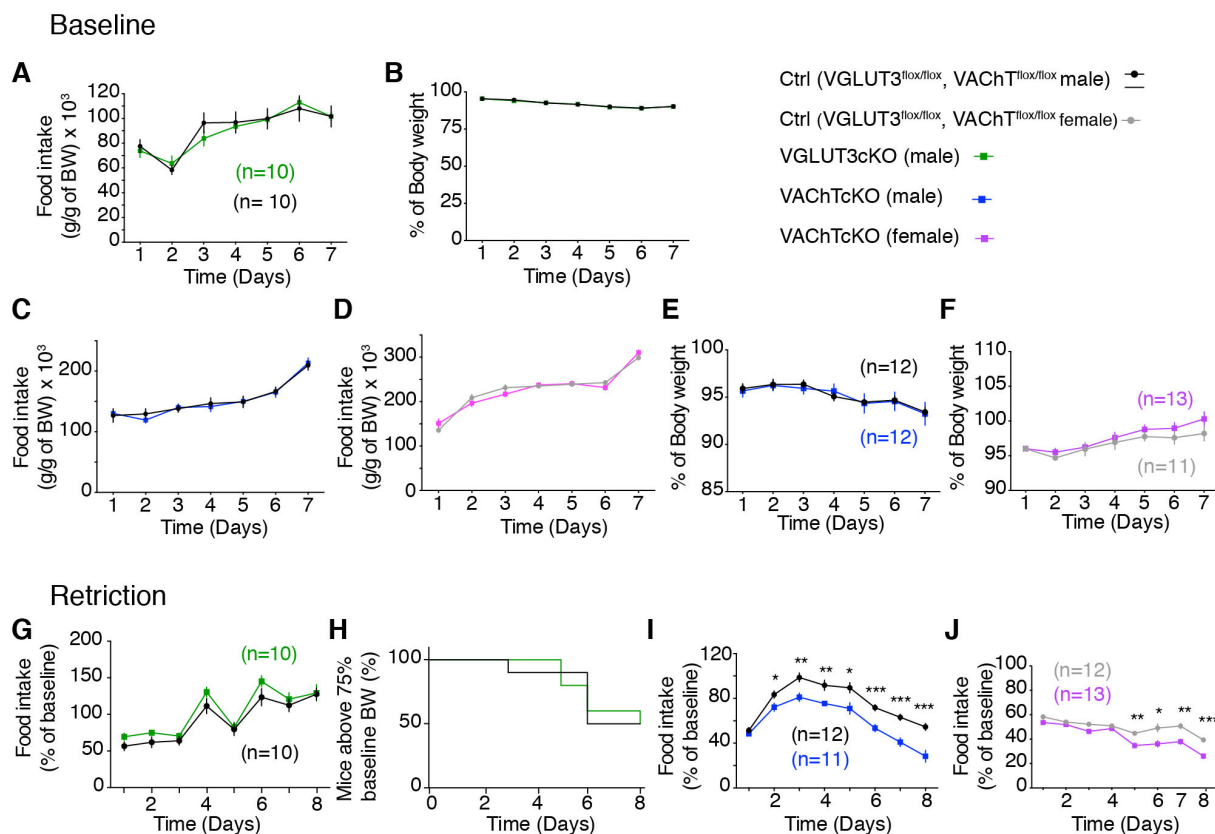

1135

1136

**Supplementary Figure 11.**

1137

**VGLUT3cKO mice, VACHTcKO mice and littermate controls during ABA model.**1138 **(A)** Daily food intake and **(B)** body weight of VGLUT3cKO male mice (n=10) and respective1139 controls (n=10) during baseline period before the ABA test. **(C, D)** Daily food intake and **(E,**1140 **F)** body weight of VACHTcKO male (n=12) and female (n=13) mice and respective controls1141 (n=11-12) during baseline period before the ABA test. **(G)** VGLUT3cKO mice (n=10) and

1142 controls (n=10) food intake during the restriction period of the activity-based anorexia model.

1143 **(H)** Percentage of VGLUT3cKO mice and controls that reached less than 75% of their1144 baseline body weight (BW) during ABA restriction period. **(I, J)** Daily food consumption

1145 during food-restriction period of the ABA test for VACHTcKO male (n=11) and female (n=13)

1146 mice compared to littermate controls (n=11-12), expressed as a percentage of baseline

1147 intake. Two-way ANOVA repeated measures for (A-G, I, J) and post hoc comparison with the

1148 method of contrasts. Kaplan-Meier test for (H) and post hoc comparison with log-rank

1149 Mantel–Cox and Gehan-Breslow-Wilcoxon tests. \**p*<0.05, \*\**p*<0.01, \*\*\**p*<0.001. All data are

1150 mean ± SEM.



1151

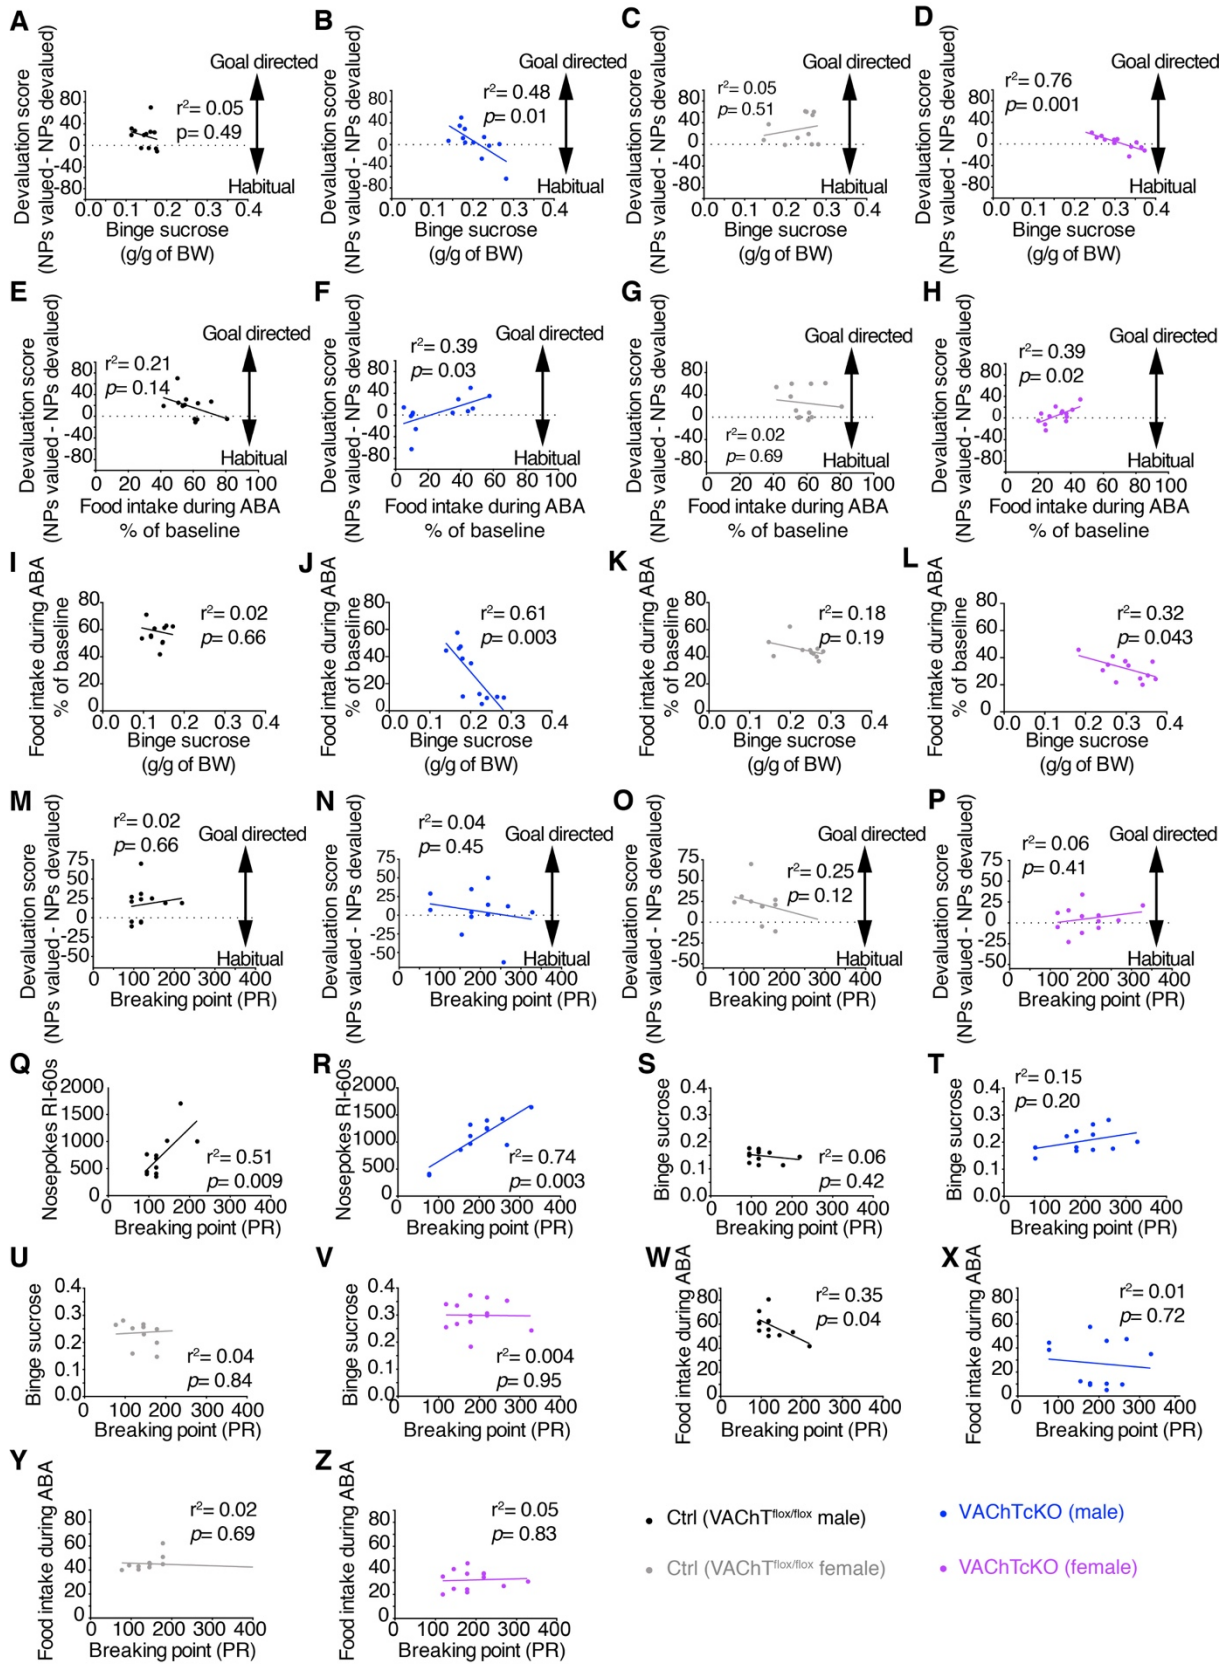

1152

1153

Supplementary Figure 12.

1154

1155 **Two-by-two Pearson correlation analyses reveal that propensity for habits, but not**  
1156 **motivation, predicts vulnerability to maladaptive eating in VACHTcKO mice.**

1157 Four groups of mice were used: male control mice, male VACHTcKO mice, female control  
1158 mice and female VACHTcKO mice. These mice performed successively: instrumental training  
1159 and outcome devaluation tests to evaluate the balance between goal-directed behaviors and  
1160 habits, motivation using the progressive ratio procedure, binge-like sucrose overconsumption  
1161 test and activity-based anorexia model. This design allowed us to run correlation analyses  
1162 between these 4 behavioral components. **(A-D)** A significant correlation was found between  
1163 the propensity to form habits and sucrose intake in the binge-like sucrose overconsumption  
1164 model for both **(B)** male and **(D)** female VACHTcKO mice. **(A,C)** On the other hand, this  
1165 correlation was not present in control mice. **(F,H)** The more VACHTcKO mice (males and  
1166 females) used habitual behavior, the more they developed dramatic food-restriction in the  
1167 activity-based anorexia model. **(E,G)** This correlation was not observed in control mice. **(J,L)**  
1168 The vulnerability of VACHTcKO mice for binge-like sucrose overconsumption was correlated  
1169 with the tendency to develop self-starvation in the activity-based anorexia model. **(I,K)** This  
1170 was not the observed in control mice. As shown in Fig. 1o, motivation was increased in  
1171 VACHTcKO male mice compared to controls. **(M-O)** However, motivation was not correlated  
1172 with propensity to develop habits, either in controls **(M,O)** or in mutant mice **(N,P)**. **(Q, R)**  
1173 Higher breaking points during the progressive ratio test was correlated with the number of  
1174 nose pokes during sucrose self-administration using the random-interval procedure, for both  
1175 controls **(Q)** and VACHTcKO mice **(R)**. **(U-Z)** Importantly, motivation was not correlated with  
1176 the vulnerability to develop maladaptive eating behaviors, with the exception of food intake in  
1177 male controls during activity-based anorexia **(W)**.

1178  
1179

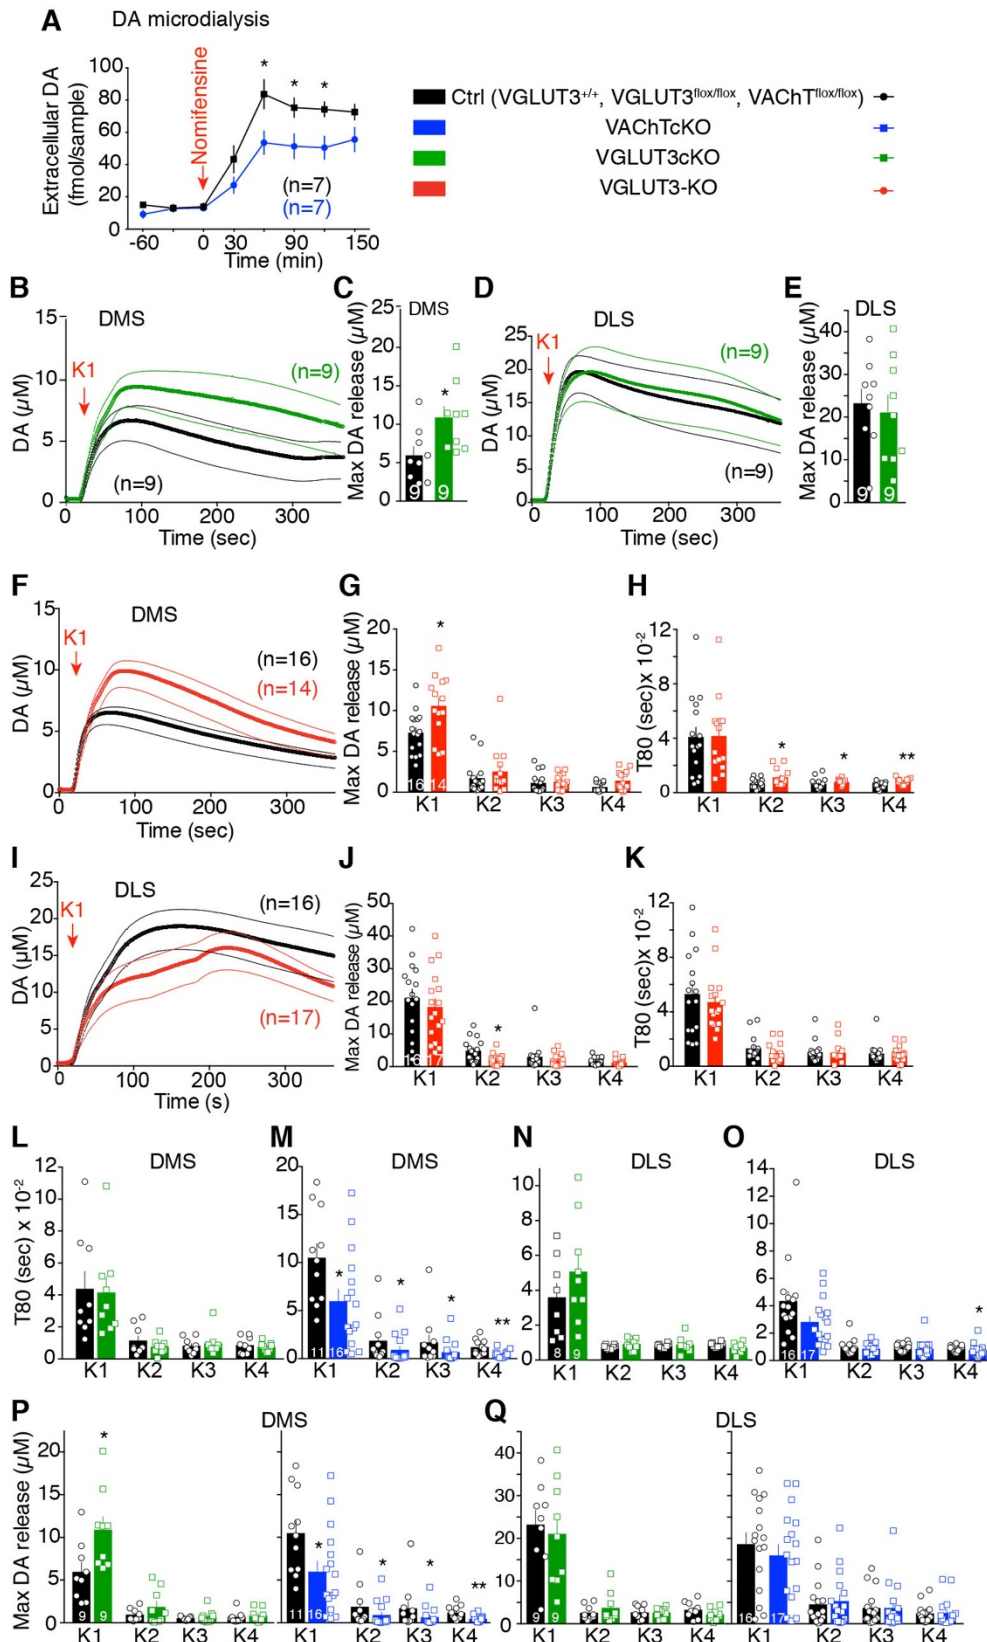

1207

1209 **DA release in the dorsal striatum of VAcHTcKO mice, VGLUT3cKO mice and**  
1210 **constitutive VGLUT3-KO mice compared with control littermates.**

1211 **(A)** Extracellular DA levels measured by *in vivo* microdialysis in the dorsal striatum of  
1212 VAcHTcKO mice (n=7) and controls (n=7) in baseline condition (-60 - 0 min) and after a  
1213 single local infusion of nomifensine (10 $\mu$ M, a dopamine reuptake inhibitor ; 0 - 150 min) *via*  
1214 the microdialysis probe. **(B)** DA release measured by *in vivo* voltammetry after KCl-induced  
1215 depolarization (K1) in the dorsomedial striatum (DMS) of VGLUT3cKO mice (n=9) and  
1216 control littermates (n=9). **(C)** Maximum DA release after KCl depolarization in the DMS of  
1217 VGLUT3cKO and controls. **(D)** DA release measured by *in vivo* voltammetry in the  
1218 dorsolateral (DLS) of VGLUT3cKO mice and controls after KCl-induced depolarization (K1).  
1219 **(E)** Maximum DA release after KCl depolarization in the DLS of VGLUT3cKO mice and  
1220 controls. **(F)** DA release measured by *in vivo* voltammetry in DMS of VGLUT3-KO mice  
1221 (n=14) and controls (n=16) after KCl-induced depolarization (K1). **(G)** Maximum DA release  
1222 after KCl-induced depolarization (K1-K4) in the DMS for VGLUT3-KO mice and controls. **(H)**  
1223 Accommodation of DA efflux (T80) after consecutive KCl stimulation in the DMS of  
1224 VGLUT3cKO mice and controls. **(I)** DA release measured by *in vivo* voltammetry in DLS  
1225 of VGLUT3-KO (n=17) and controls (n=16) after KCl-induced depolarization (K1). **(J)**  
1226 Maximum DA release after KCl-induced depolarization (K1-K4) in the DLS for VGLUT3-KO  
1227 mice and controls. **(K)** Accommodation of DA efflux (T80) after consecutive KCl stimulation  
1228 (K1-K4) in the DLS of VGLUT3-KO mice and controls. **(L)** Accommodation of DA efflux (T80)  
1229 after consecutive KCl stimulation (K1-K4) in the DMS of VGLUT3cKO mice and controls. **(M)**  
1230 Accommodation of DA efflux (T80) after consecutive KCl stimulation (K1-K4) in the DMS of  
1231 VAcHTcKO mice (n=16) and controls (n=11). **(N)** Accommodation of DA efflux (T80) after  
1232 consecutive KCl stimulation (K1-K4) in the DLS of VGLUT3cKO mice and controls. **(O)**  
1233 Accommodation of DA efflux (T80) after consecutive KCl stimulation (K1-K4) in the DLS of  
1234 VAcHTcKO mice (n=17) and controls (n=16). **(P)** Maximum DA release after KCl-induced  
1235 depolarization (K1-K4) in the DMS for VGLUT3cKO and control mice or VAcHTcKO mice  
1236 and controls. **(Q)** Maximum DA release after KCl-induced depolarization (K1-K4) in the DLS  
1237 for VGLUT3cKO mice and controls or VAcHTcKO mice and controls. Note that regulation of  
1238 DA release was only found in the DMS of VAcHTcKO mice, VGLUT3cKO mice or VGLUT3-  
1239 KO mice, but not in the DLS. Two-way ANOVA repeated measures for (A), (B), (D), (F), (I)  
1240 and Mann Whitney for (C), (E), (G), (H), (J), (K), and (L) to (Q). Bonferroni's post hoc  
1241 comparison for (A). \* $p < 0.05$ , \*\* $p < 0.01$ . All data are mean  $\pm$  SEM.

1242

1243

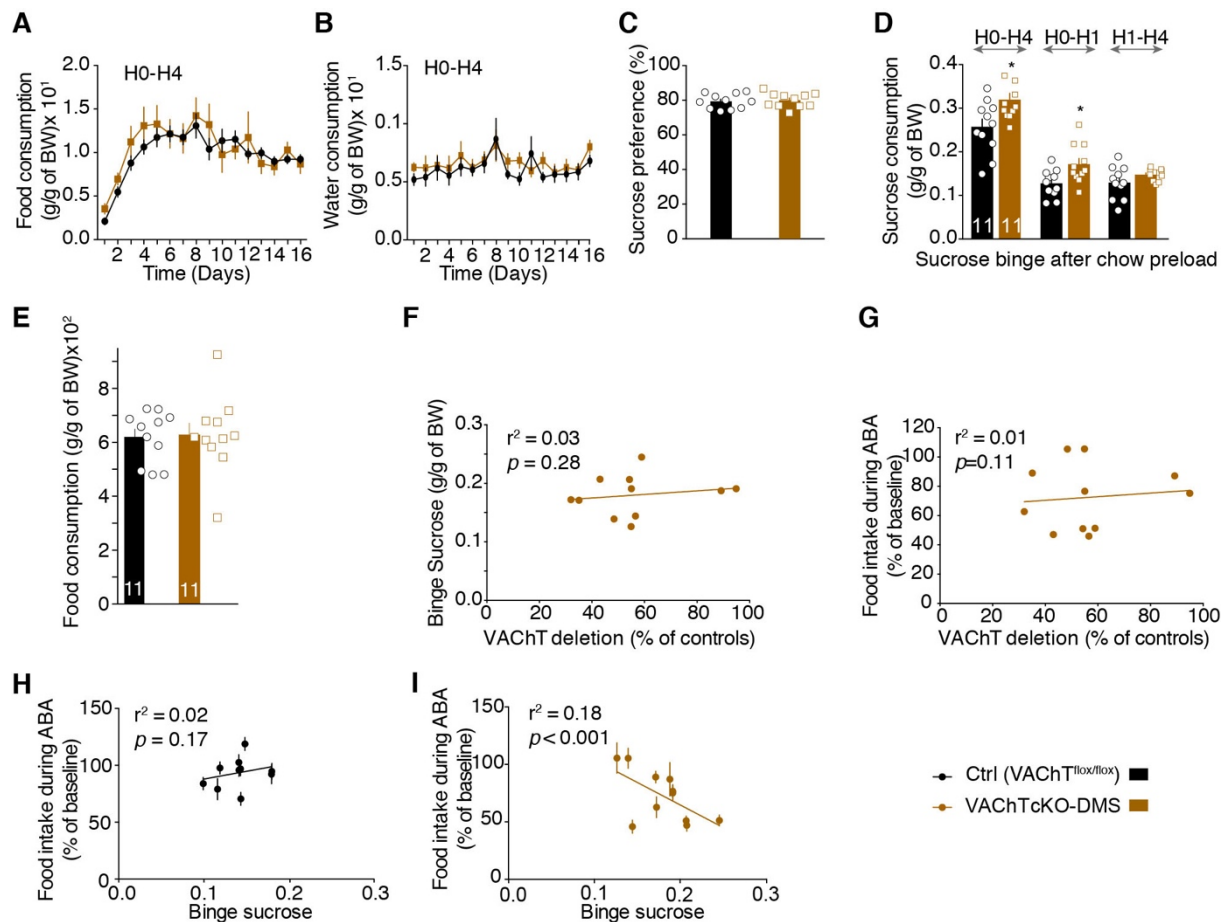

1244

1245 **Supplementary Figure 14.**

1246 **Additional results on the performance of VAcHTcKO-DMS mice and control littermates**  
 1247 **during binge-like sucrose overconsumption and activity-based anorexia models.**

1248 **(A)** Food consumption of VAcHTcKO-DMS mice and control littermates along the 16 days of  
 1249 binge-like testing during the total period of access (H0-H4). **(B)** Water consumption during the  
 1250 total duration of access (H0-H4) of VAcHTcKO-DMS mice and controls. **(C)** Sucrose  
 1251 preference of VAcHTcKO-DMS mice and controls. **(D)** Sucrose consumption during the total  
 1252 duration of sucrose access (H0-H4), the first hour of access (H0-H1) and the 3 last hours  
 1253 (H1-H4) for VAcHTcKO-DMS mice and controls after mice have been exposed for 1 hour to  
 1254 *ad libitum* food (chow pre-load). **(E)** Food intake of VAcHTcKO-DMS mice and controls  
 1255 during chow pre-load. **(F)** Pearson linear regression comparing the extent of VAcHT deletion  
 1256 (measured by the density of the labelling using immunohistochemistry) in individual  
 1257 VAcHTcKO-DMS mice (25-100%) with the quantity of sucrose consumed in the first hour of  
 1258 access to sucrose during binge-like model. **(G)** Pearson linear regression comparing the  
 1259 extent of VAcHT deletion in individual VAcHTcKO-DMS mice with food intake measured  
 1260 during food-restriction period of ABA model. Note that no significant correlation was  
 1261 observed between VAcHT deletion and binge or ABA phenotypes, suggesting that even a

1262 partial disruption of VAcHT expression in the DMS is sufficient to precipitate maladaptive  
1263 eating. **(H)** Correlation analysis between sucrose consumption in the first hour of access to  
1264 sucrose during binge-like model and food intake during food-restriction period of ABA model  
1265 for control mice. **(i)** Correlation analysis between sucrose consumption in the first hour of  
1266 access to sucrose during binge-like model and food intake during food-restriction period of  
1267 ABA model for VAcHTcKO-DMS mice. Note that a significant correlation between sucrose  
1268 bingeing and decreased food intake is specifically observed in VAcHTcKO-DMS mice. Two-  
1269 way ANOVA repeated measure for (A), (B) and post hoc comparison with the method of  
1270 contrasts. Unpaired t-test for (C) to (E). Dimensional analyses were performed by parametric  
1271 simple linear regressions for (F) to (I). \* $p < 0.05$ . All data are mean  $\pm$  SEM.

1272



1273

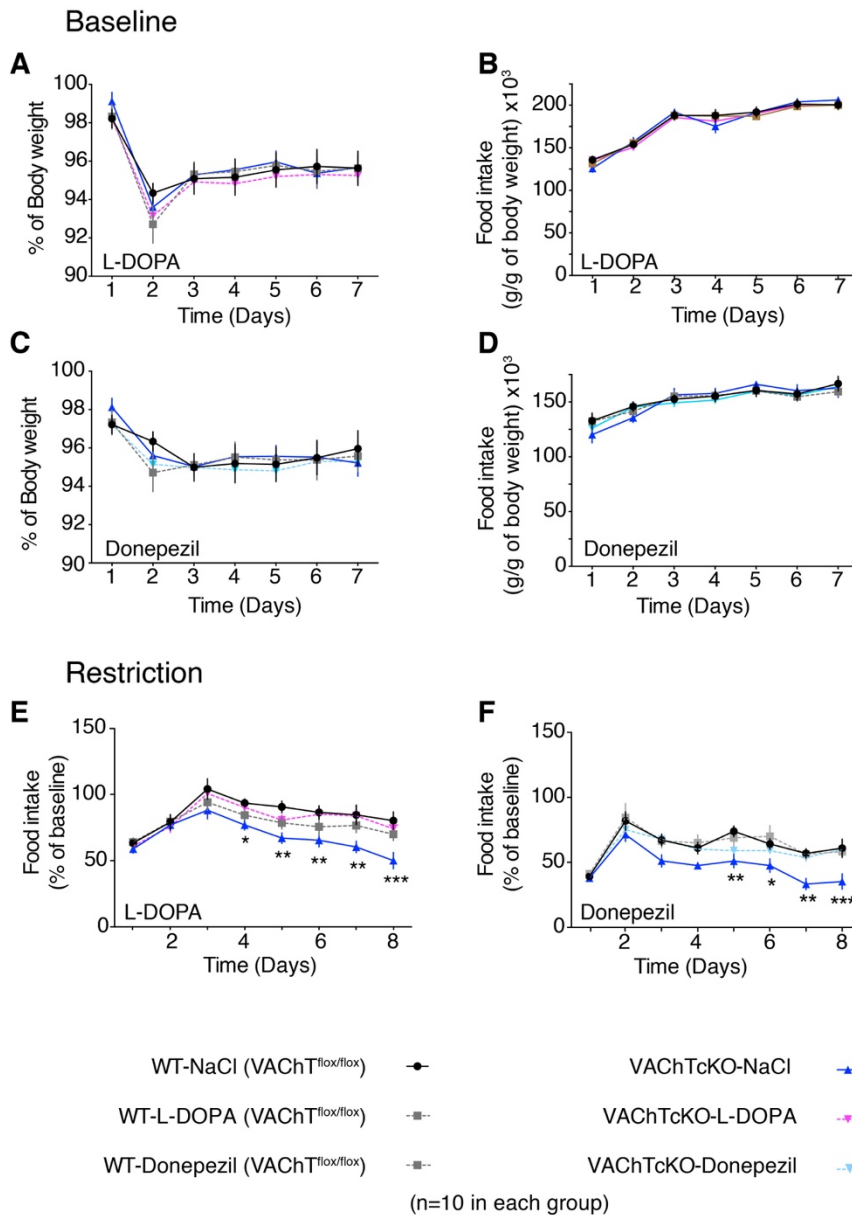

1272

1293

1294 **Supplementary Figure 15.**

1295 **Additional results on the performance of control and VChTcKO mice in the activity-**  
 1296 **based anorexia model in the presence or absence of chronic treatment with L-DOPA**  
 1297 **or donepezil.**

1298 **(A,B)** Chronic pharmacological treatment (IP injection) with L-DOPA (15mg.kg<sup>-1</sup>) **(A)** Daily  
 1299 food intake for VChTcKO or control mice treated with saline or L-DOPA during baseline of  
 1300 the ABA test. **(B)** Mean daily BW change during baseline of the ABA test for VChTcKO  
 1301 mice or control mice treated with saline or L-DOPA. **(C,D).** Chronic pharmacological

1302 treatment (IP injection) with Donepezil ( $0.3\text{mg}\cdot\text{kg}^{-1}$ ). **(C)** Daily food intake for VACHTcKO  
1303 mice or control mice treated with saline or Donepezil during baseline of the ABA test. **(D)**  
1304 Mean daily BW change during baseline of the ABA test for VACHTcKO mice or control mice  
1305 treated with saline or Donepezil. **(E, F)** Daily food consumption during food-restriction period  
1306 of ABA for VACHTcKO male and female mice treated with L-DOPA **(E)** or Donepezil **(F)**  
1307 compared to littermate controls. Two-way ANOVA repeated measure for (A-F) and post hoc  
1308 comparison with Dunnett's test. \* $p<0.05$ , \*\* $p<0.01$ , \*\*\* $p<0.001$ . All data are mean  $\pm$  SEM.  
1309



1310

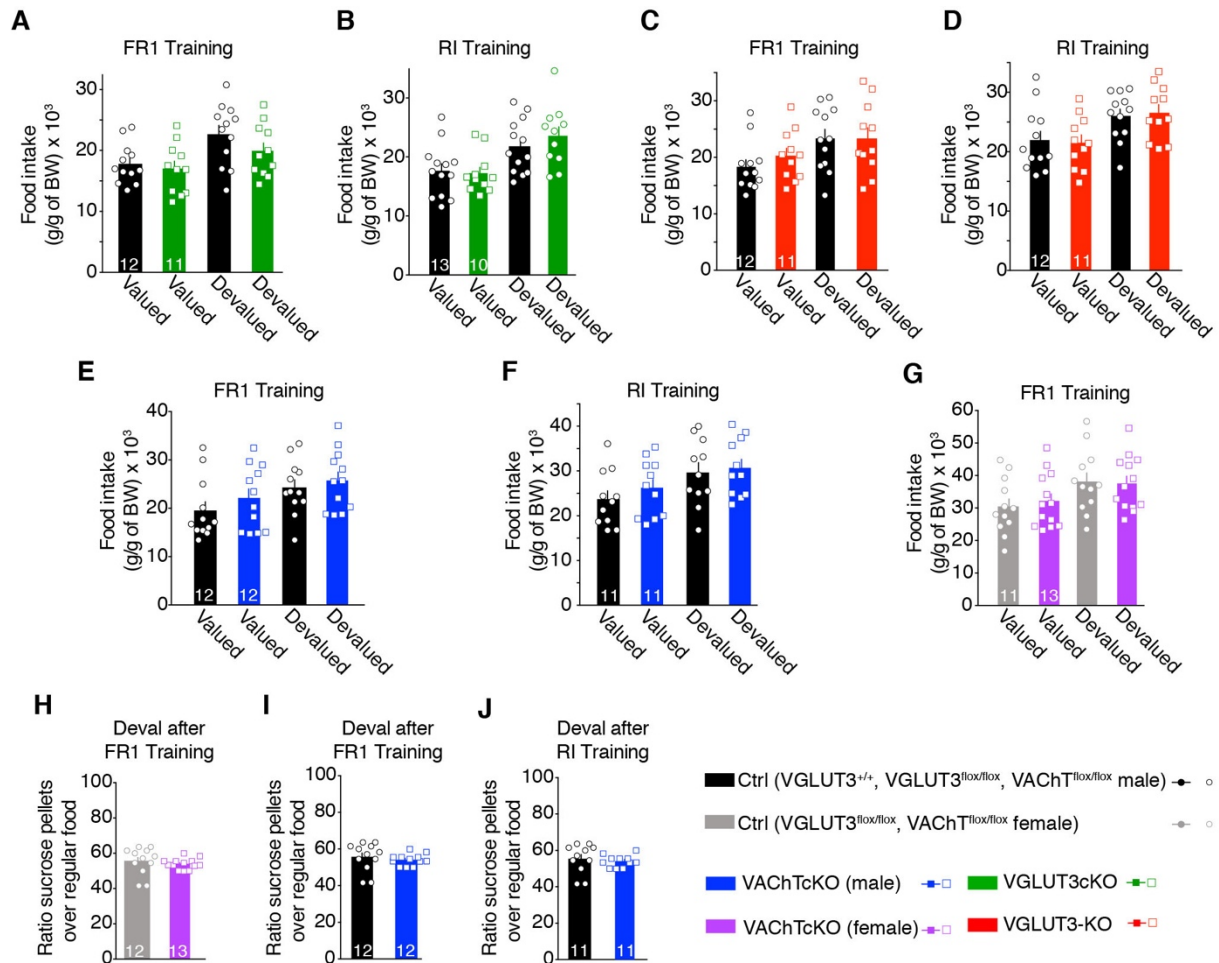

1311

1312

**Supplementary Figure 16.**

1313

**Food consumption of control and mutant mouse lines during the 1-hour pre-feeding**

1314

**period preceding devaluation tests.**

1315

(A-G). Mean food intake of VGLUT3cKO mice (A,B), VGLUT3-KO mice (C,D), male

1316

VAcHTcKO mice (E,F) and female VAcHTcKO mice (G) during the 60-min prefeeding period

1317

with free access to either regular home chow (valued) or sucrose pellets (devalued) before

1318

devaluation test. (H-J) Ratio between the quantity of sucrose pellets versus regular home

1319

chow consumed over 2 days of devaluations tests for VAcHTcKO mice, females (H) and

1320

males (I,J). Unpaired t-test for (A) to (J).

1321

Suppl Figure 3A

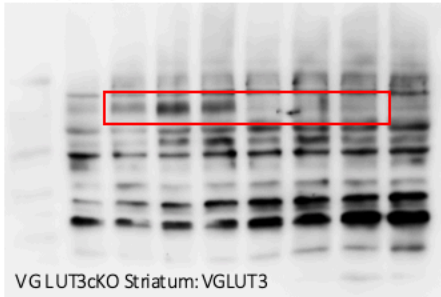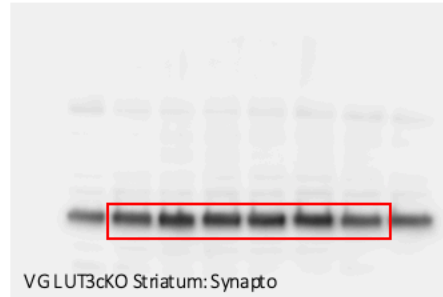

Suppl Figure 3B

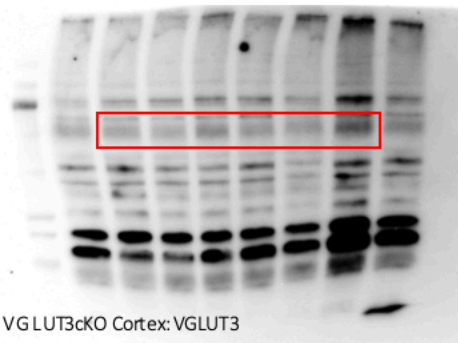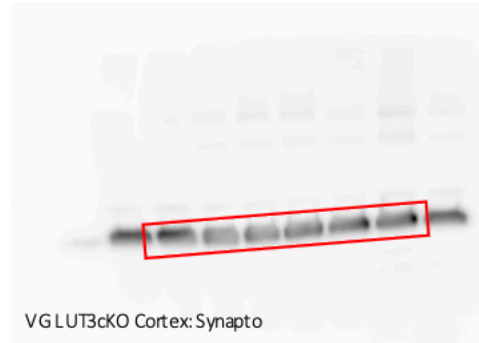

Suppl Figure 3C

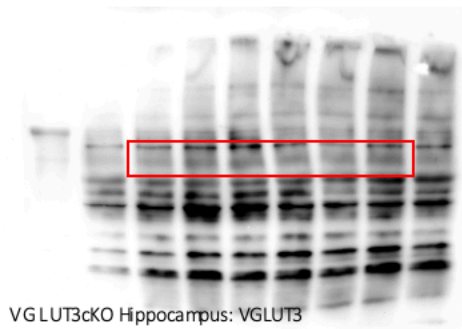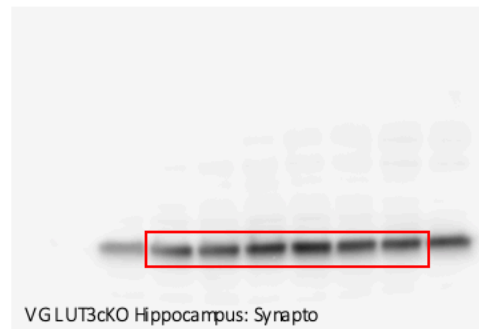

Suppl Figure 3D

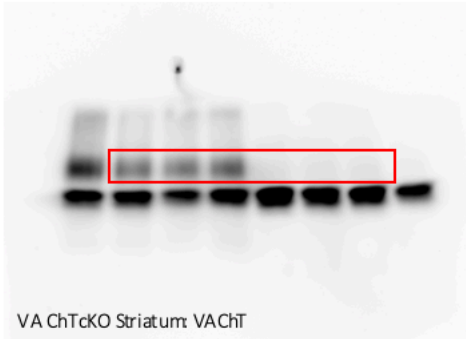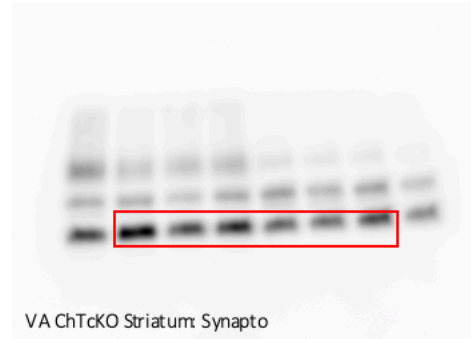

Suppl Figure 3E

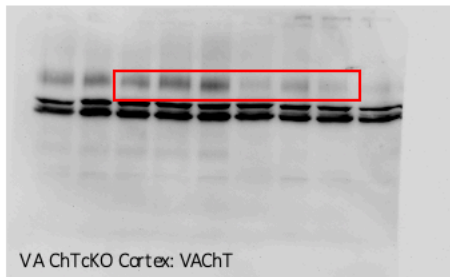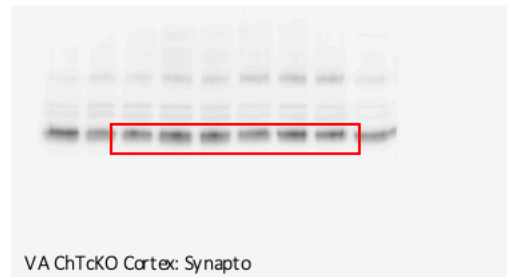

Suppl Figure 3F

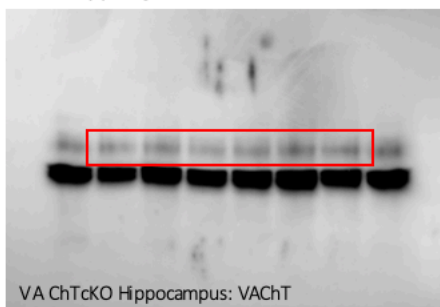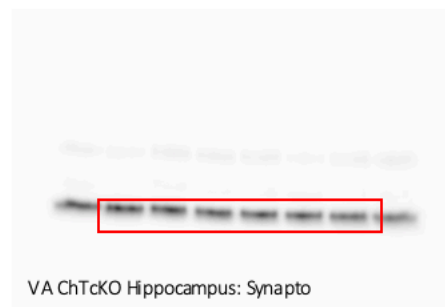

Suppl Figure 3I

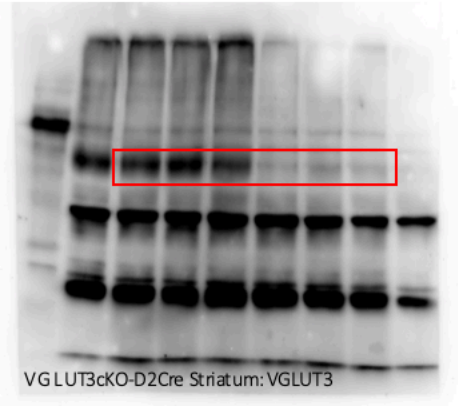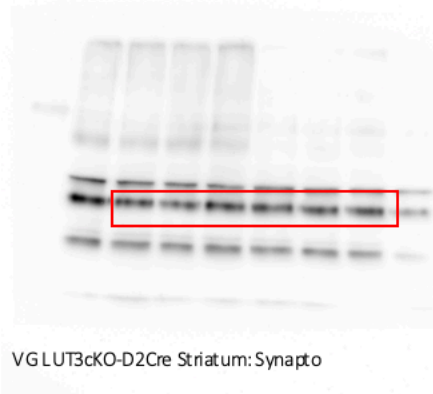

Suppl Figure 3J

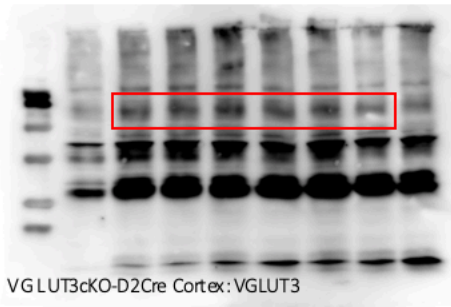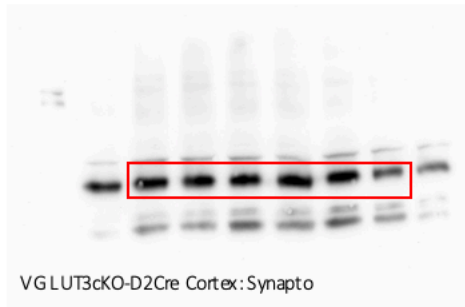

Suppl Figure 3K

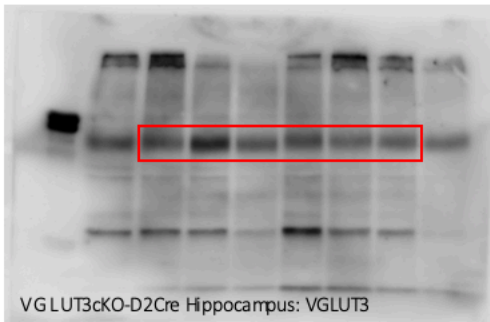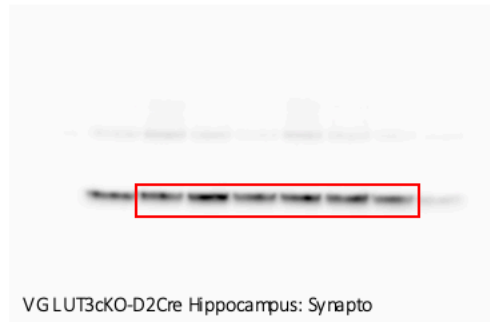

1322 **References**

- 1323 1. Godier LR, de Wit S, Pinto A, Steinglass JE, Greene AL, Scaife J, et al. An  
1324 investigation of habit learning in Anorexia Nervosa. *Psychiatry Res.* 2016;244:214-22.
- 1325 2. Worbe Y, Savulich G, de Wit S, Fernandez-Egea E, and Robbins TW. Tryptophan  
1326 Depletion Promotes Habitual over Goal-Directed Control of Appetitive Responding in  
1327 Humans. *Int J Neuropsychopharmacol.* 2015;18(10):pyv013.
- 1328 3. Amilhon B, Lopicard E, Renoir T, Mongeau R, Popa D, Poirel O, et al. VGLUT3  
1329 (vesicular glutamate transporter type 3) contribution to the regulation of serotonergic  
1330 transmission and anxiety. *J Neurosci.* 2010;30(6):2198-210.
- 1331 4. Gras C, Amilhon B, Lopicard EM, Poirel O, Vinatier J, Herbin M, et al. The vesicular  
1332 glutamate transporter VGLUT3 synergizes striatal acetylcholine tone. *Nat Neurosci.*  
1333 2008;11(3):292-300.
- 1334 5. Fasano C, Rocchetti J, Pietrajtis K, Zander JF, Manseau F, Sakae DY, et al.  
1335 Regulation of the Hippocampal Network by VGLUT3-Positive CCK- GABAergic Basket Cells.  
1336 *Front Cell Neurosci.* 2017;11:140.
- 1337 6. Martins-Silva C, De Jaeger X, Guzman MS, Lima RD, Santos MS, Kushmerick C, et  
1338 al. Novel strains of mice deficient for the vesicular acetylcholine transporter: insights on  
1339 transcriptional regulation and control of locomotor behavior. *PLoS One.* 2011;6(3):e17611.
- 1340 7. Guzman MS, De Jaeger X, Drangova M, Prado MA, Gros R, and Prado VF. Mice with  
1341 selective elimination of striatal acetylcholine release are lean, show altered energy  
1342 homeostasis and changed sleep/wake cycle. *J Neurochem.* 2013;124(5):658-69.
- 1343 8. Guevara BH, Talmaciu RK, Hoffmann IS, and Cubeddu LX. Comparative dopamine-  
1344 acetylcholine interactions in the ventral and dorsal striatum of rabbit and rat brain. *Brain Res.*  
1345 1996;733(1):105-7.
- 1346 9. Jongen-Relo AL, Docter GJ, Jonker AJ, and Voorn P. Differential localization of  
1347 mRNAs encoding dopamine D1 or D2 receptors in cholinergic neurons in the core and shell  
1348 of the rat nucleus accumbens. *Brain Res Mol Brain Res.* 1995;28(1):169-74.
- 1349 10. Janickova H, Rosborough K, Al-Onaizi M, Kljakic O, Guzman MS, Gros R, et al.  
1350 Deletion of the vesicular acetylcholine transporter from pedunculo pontine/laterodorsal  
1351 tegmental neurons modifies gait. *J Neurochem.* 2017;140(5):787-98.
- 1352 11. Kolisnyk B, Al-Onaizi MA, Hirata PH, Guzman MS, Nikolova S, Barbash S, et al.  
1353 Forebrain deletion of the vesicular acetylcholine transporter results in deficits in executive  
1354 function, metabolic, and RNA splicing abnormalities in the prefrontal cortex. *J Neurosci.*  
1355 2013;33(37):14908-20.

- 1356 12. Nithianantharajah J, and Grant SG. Cognitive components in mice and humans:  
1357 combining genetics and touchscreens for medical translation. *Neurobiol Learn Mem.*  
1358 2013;105:13-9.
- 1359 13. Rossi MA, and Yin HH. Methods for studying habitual behavior in mice. *Curr Protoc*  
1360 *Neurosci.* 2012;Chapter 8:Unit 8 29.
- 1361 14. Yasoshima Y, and Shimura T. A mouse model for binge-like sucrose  
1362 overconsumption: Contribution of enhanced motivation for sweetener consumption. *Physiol*  
1363 *Behav.* 2015;138:154-64.
- 1364 15. Klenotich SJ, and Dulawa SC. The activity-based anorexia mouse model. *Methods*  
1365 *Mol Biol.* 2012;829:377-93.
- 1366 16. Herrik KF, Mork A, Richard N, Bundgaard C, Bastlund JF, and de Jong IEM. The 5-  
1367 HT6 receptor antagonist idalopirdine potentiates the effects of acetylcholinesterase inhibition  
1368 on neuronal network oscillations and extracellular acetylcholine levels in the rat dorsal  
1369 hippocampus. *Neuropharmacology.* 2016;107:351-63.
- 1370 17. Sakae DY, Marti F, Lecca S, Vorspan F, Martin-Garcia E, Morel LJ, et al. The  
1371 absence of VGLUT3 predisposes to cocaine abuse by increasing dopamine and glutamate  
1372 signaling in the nucleus accumbens. *Mol Psychiatry.* 2015;20(11):1448-59.
- 1373 18. Richardson NR, and Gratton A. Changes in nucleus accumbens dopamine  
1374 transmission associated with fixed- and variable-time schedule-induced feeding. *Eur J*  
1375 *Neurosci.* 2008;27(10):2714-23.
- 1376 19. Kievit RA, Davis SW, Mitchell DJ, Taylor JR, Duncan J, Cam CANRT, et al. Distinct  
1377 aspects of frontal lobe structure mediate age-related differences in fluid intelligence and  
1378 multitasking. *Nat Commun.* 2014;5:5658.
- 1379
